# Supplementary material
Source: ML conference proceedings conference paper supplement (https://aclanthology.org/2025.loreslm-1.26)
Supplement: OptionalSupplementaryMaterial [file 2025.loreslm-1.26.OptionalSupplementaryMaterial.zip]

## Sheet: Sheet1
sg_id	wc_id	reddit_id	question	is_causal	reasoning	action_class	source	question_spacy	doc	tokens	tokens_join	tokens_len	5w2h	ttr	nunique_tk	5w2h_reasoning	nwords	unid
		t3_1fufgzg	A vida adulta é só trabalho e casa, rotina assim até o dia da morte? Sério isso?	FALSE			reddit	a vida adulta e so trabalho e casa rotina assim ate o dia da morte serio isso	a vida adulta e so trabalho e casa rotina assim ate o dia da morte serio isso	['a', 'vida', 'adulta', 'e', 'so', 'trabalho', 'e', 'casa', 'rotina', 'assim', 'ate', 'o', 'dia', 'da', 'morte', 'serio', 'isso']	a vida adulta e so trabalho e casa rotina assim ate o dia da morte serio isso	17	Outro	0.941176	16	A pergunta não se encaixa claramente em nenhuma das categorias propostas (O quê, Por quê, Quem, Onde, Quando, Como, Quanto). Ela expressa uma reflexão ou comentário sobre a percepção de vida adulta e rotina, sem uma busca objetiva por informações específicas ou instruções. É uma indagação mais existencial ou retórica sobre a natureza da vida adulta, não buscando uma resposta factual ou informativ…		t3_1fufgzg
		t3_1fugb2y	Altura é realmente a coisa que mais importa em um homem ( fisicamente) ?	FALSE			reddit	altura e realmente a coisa que mais importa em um homem fisicamente	altura e realmente a coisa que mais importa em um homem fisicamente	['altura', 'e', 'realmente', 'a', 'coisa', 'que', 'mais', 'importa', 'em', 'um', 'homem', 'fisicamente']	altura e realmente a coisa que mais importa em um homem fisicamente	12	Outro	1	12	A pergunta está buscando uma opinião ou declaração sobre a importância da altura em homens, mas não se encaixa claramente em nenhuma das categorias fornecidas, pois não está perguntando sobre uma ação, justificativa, responsável, localização, cronologia, método ou custo. A pergunta é mais subjetiva e não se alinha diretamente com as categorias definidas.		t3_1fugb2y
		t3_1fuqr3x	Vocês se sentem anormais por nunca ter um relacionamento?	FALSE			reddit	voces se sentem anormais por nunca ter um relacionamento	voces se sentem anormais por nunca ter um relacionamento	['voces', 'se', 'sentem', 'anormais', 'por', 'nunca', 'ter', 'um', 'relacionamento']	voces se sentem anormais por nunca ter um relacionamento	9	Outro	1	9	A pergunta "Vocês se sentem anormais por nunca ter um relacionamento?" não se encaixa diretamente em nenhuma das categorias listadas, pois não está buscando uma ação, justificativa, pessoa, local, tempo, método ou custo. Em vez disso, a pergunta busca explorar uma percepção ou sentimento pessoal relacionado a uma experiência humana específica, que é não ter tido um relacionamento. Portanto, foi c…		t3_1fuqr3x
		t3_1fuj3vb	O reddit está traduzindo tudo sozinho? Até textos em imagens?	FALSE			reddit	o reddit esta traduzindo tudo sozinho ate textos em imagens	o reddit esta traduzindo tudo sozinho ate textos em imagens	['o', 'reddit', 'esta', 'traduzindo', 'tudo', 'sozinho', 'ate', 'textos', 'em', 'imagens']	o reddit esta traduzindo tudo sozinho ate textos em imagens	10	Como	1	10	A pergunta busca entender o processo ou método pelo qual o Reddit está lidando com a tradução de textos. Está perguntando se o Reddit realiza automaticamente traduções, inclusive de textos contidos nas imagens, focando em como essa ação ocorre.		t3_1fuj3vb
		t3_1fuhsjb	(H33) Sou usuário de cannabis e faço uso diário. Entretanto, tenho uma vida normal, trabalho, estudo, faço academia. O fato de eu ser fumante é um empecilho pra se relacionar amorosamente comigo? Estou velho demais pra isso?	FALSE			reddit	h33 sou usuario de cannabis e faco uso diario entretanto tenho uma vida normal trabalho estudo faco academia o fato de eu ser fumante e um empecilho pra se relacionar amorosamente comigo estou velho demais pra isso	h33 sou usuario de cannabis e faco uso diario entretanto tenho uma vida normal trabalho estudo faco academia o fato de eu ser fumante e um empecilho pra se relacionar amorosamente comigo estou velho demais pra isso	['h33', 'sou', 'usuario', 'de', 'cannabis', 'e', 'faco', 'uso', 'diario', 'entretanto', 'tenho', 'uma', 'vida', 'normal', 'trabalho', 'estudo', 'faco', 'academia', 'o', 'fato', 'de', 'eu', 'ser', 'fumante', 'e', 'um', 'empecilho', 'pra', 'se', 'relacionar', 'amorosamente', 'comigo', 'estou', 'velho', 'demais', 'pra', 'isso']	h33 sou usuario de cannabis e faco uso diario entretanto tenho uma vida normal trabalho estudo faco academia o fato de eu ser fumante e um empecilho pra se relacionar amorosamente comigo estou velho demais pra isso	37	Outro	0.891892	33	As perguntas feitas pelo usuário não se encaixam claramente em nenhuma das categorias fornecidas. A primeira parte questiona se ser fumante de cannabis é um empecilho para relacionamentos amorosos, uma consideração subjetiva e pessoal que não busca ação, justificativa, responsável, localização, tempo, método ou custo específico. A segunda parte sobre "estar velho demais para isso" também não se e…		t3_1fuhsjb
		t3_1fuhthh	De 0 a 10, o quão influente a minha família deveria ser na hora de eu escolher um parceiro (a)?	FALSE			reddit	de 0 a 10 o quao influente a minha familia deveria ser na hora de eu escolher um parceiro a	de 0 a 10 o quao influente a minha familia deveria ser na hora de eu escolher um parceiro a	['de', '0', 'a', '10', 'o', 'quao', 'influente', 'a', 'minha', 'familia', 'deveria', 'ser', 'na', 'hora', 'de', 'eu', 'escolher', 'um', 'parceiro', 'a']	de 0 a 10 o quao influente a minha familia deveria ser na hora de eu escolher um parceiro a	20	Quanto	0.85	17	A pergunta busca saber o grau de influência que a família deveria ter na escolha de um parceiro(a), sendo "de 0 a 10" uma medida de quantidade ou intensidade dessa influência. Portanto, a questão está relacionada a quanto a família deve influenciar.		t3_1fuhthh
		t3_1fuiwvn	Além de sair do país com passaporte para que é obrigado a ter título de eleitor?	FALSE			reddit	alem de sair do pais com passaporte para que e obrigado a ter titulo de eleitor	alem de sair do pais com passaporte para que e obrigado a ter titulo de eleitor	['alem', 'de', 'sair', 'do', 'pais', 'com', 'passaporte', 'para', 'que', 'e', 'obrigado', 'a', 'ter', 'titulo', 'de', 'eleitor']	alem de sair do pais com passaporte para que e obrigado a ter titulo de eleitor	16	O quê	0.9375	15	A pergunta busca identificar quais são as situações ou ações além de sair do país que requerem a posse do título de eleitor, ou seja, está interessada em saber "quais" ações obrigam alguém a ter um título de eleitor. Portanto, a pergunta se encaixa na categoria O quê, que é sobre ações a serem executadas ou a identificação de objeto.		t3_1fuiwvn
		t3_1fu8y1h	Postar stories de música no instagram é cringe?	FALSE			reddit	postar stories de musica no instagram e cringe	postar stories de musica no instagram e cringe	['postar', 'stories', 'de', 'musica', 'no', 'instagram', 'e', 'cringe']	postar stories de musica no instagram e cringe	8	Outro	1	8	A pergunta não se encaixa perfeitamente em nenhuma das categorias fornecidas, pois está pedindo uma avaliação ou opinião sobre algo (postar stories de música no Instagram ser "cringe"), que não se enquadra nas categorias típicas de busca por ação, justificativa, responsável, local, tempo, método ou custo. Portanto, a classificação apropriada é "Outro".		t3_1fu8y1h
		t3_1fu3ehy	Porque as lojas dão desconto pra pagamento via pix, mas pra boleto não?	FALSE			reddit	porque as lojas dao desconto pra pagamento via pix mas pra boleto nao	porque as lojas dao desconto pra pagamento via pix mas pra boleto nao	['porque', 'as', 'lojas', 'dao', 'desconto', 'pra', 'pagamento', 'via', 'pix', 'mas', 'pra', 'boleto', 'nao']	porque as lojas dao desconto pra pagamento via pix mas pra boleto nao	13	Por quê	0.923077	12	A pergunta busca uma justificativa ou motivo para a diferença de tratamento nas formas de pagamento, buscando entender a razão por trás do desconto para pagamento via pix, mas não para boleto. Assim, trata-se de uma pergunta que busca explicar uma razão ou motivação para a situação mencionada.		t3_1fu3ehy
		t3_1fuf2ia	Vocês moram em cidade grande ou pequena?	FALSE			reddit	voces moram em cidade grande ou pequena	voces moram em cidade grande ou pequena	['voces', 'moram', 'em', 'cidade', 'grande', 'ou', 'pequena']	voces moram em cidade grande ou pequena	7	Outro	1	7	A pergunta não se enquadra nas categorias apresentadas, pois ela está pedindo uma informação pessoal sobre o local de residência (se em cidade grande ou pequena), mas não está buscando saber de alguma ação, razão, responsável, local específico, tempo, método, ou custo. Portanto, não se encaixa nas categorias definidas.		t3_1fuf2ia
		t3_1fu5nks	Arquitetura tá valendo a pena?	FALSE			reddit	arquitetura ta valendo a pena	arquitetura ta valendo a pena	['arquitetura', 'ta', 'valendo', 'a', 'pena']	arquitetura ta valendo a pena	5	O quê	1	5	A pergunta "Arquitetura tá valendo a pena?" está buscando uma avaliação sobre a validade ou relevância de estudar ou trabalhar na área de arquitetura. Embora pareça subjetiva, a essência da pergunta é identificar se esta área é considerada vantajosa ou não, o que se alinha com a classificação de "O quê", pois busca identificar ou classificar algo sobre um campo de atuação.		t3_1fu5nks
		t3_1fu2b4w	O quão ruim pode ser a coneequência de puxar o tapete dos colegas?	FALSE			reddit	o quao ruim pode ser a coneequencia de puxar o tapete dos colegas	o quao ruim pode ser a coneequencia de puxar o tapete dos colegas	['o', 'quao', 'ruim', 'pode', 'ser', 'a', 'coneequencia', 'de', 'puxar', 'o', 'tapete', 'dos', 'colegas']	o quao ruim pode ser a coneequencia de puxar o tapete dos colegas	13	Quanto	0.923077	12	A pergunta busca entender a extensão dos impactos ou a gravidade das consequências de uma ação, neste caso, "puxar o tapete dos colegas". Isso envolve uma avaliação do custo ou da magnitude da consequência em termos de efeitos negativos, o que se alinha com perguntas que visam entender "quanto" algo pode ser ruim ou afetar uma situação.		t3_1fu2b4w
		t3_1fuf80r	Na época do VHS, você assistia mais filmes dublados ou legendados?	FALSE			reddit	na epoca do vhs voce assistia mais filmes dublados ou legendados	na epoca do vhs voce assistia mais filmes dublados ou legendados	['na', 'epoca', 'do', 'vhs', 'voce', 'assistia', 'mais', 'filmes', 'dublados', 'ou', 'legendados']	na epoca do vhs voce assistia mais filmes dublados ou legendados	11	O quê	1	11	A pergunta está buscando identificar a preferência pessoal de alguém sobre o tipo de filme assistido (dublado ou legendado) durante a época do VHS. Trata-se de uma questão de identificação de uma escolha ou coisa (tipo de filme) que alguém costumava assistir.		t3_1fuf80r
		t3_1fu0yl6	Porque idosos/adultos mais velhos gostam tanto de assistir crianças cantando?	FALSE			reddit	porque idososadultos mais velhos gostam tanto de assistir criancas cantando	porque idososadultos mais velhos gostam tanto de assistir criancas cantando	['porque', 'idososadultos', 'mais', 'velhos', 'gostam', 'tanto', 'de', 'assistir', 'criancas', 'cantando']	porque idososadultos mais velhos gostam tanto de assistir criancas cantando	10	Por quê	1	10	A pergunta busca entender a justificativa ou motivação para o fato de idosos/adultos mais velhos gostarem de assistir crianças cantando. Está perguntando sobre o motivo por trás desse comportamento específico.		t3_1fu0yl6
		t3_1fuc555	Você tem o senso crítico apurado?	FALSE			reddit	voce tem o senso critico apurado	voce tem o senso critico apurado	['voce', 'tem', 'o', 'senso', 'critico', 'apurado']	voce tem o senso critico apurado	6	Outro	1	6	A pergunta "Você tem o senso crítico apurado?" não se enquadra diretamente em nenhuma das categorias predefinidas, pois trata-se de uma questão introspectiva sobre a presença ou ausência de uma habilidade pessoal, e não busca uma ação específica, justificativa, identificação de responsável, localização, tempo, método, ou custo.		t3_1fuc555
		t3_1fu5x1r	Nunca vi 1. Existe algum Felipe que não faça uso de óculos ?	FALSE			reddit	nunca vi 1 existe algum felipe que nao faca uso de oculos	nunca vi 1 existe algum felipe que nao faca uso de oculos	['nunca', 'vi', '1', 'existe', 'algum', 'felipe', 'que', 'nao', 'faca', 'uso', 'de', 'oculos']	nunca vi 1 existe algum felipe que nao faca uso de oculos	12	Quem	1	12	A pergunta questiona a existência de um indivíduo (no caso, um "Felipe") que possua a característica de não usar óculos, portanto, está procurando saber sobre uma pessoa específica que se encaixe nesse perfil. Isso reflete o intento de identificar "quem" é o "Felipe" que não faz uso de óculos.		t3_1fu5x1r
		t3_1fu36c0	Para filmes melhor soundbar ou uma jbl/harman Bluetooth?	FALSE			reddit	para filmes melhor soundbar ou uma jblharman bluetooth	para filmes melhor soundbar ou uma jblharman bluetooth	['para', 'filmes', 'melhor', 'soundbar', 'ou', 'uma', 'jblharman', 'bluetooth']	para filmes melhor soundbar ou uma jblharman bluetooth	8	O quê	1	8	A pergunta está buscando uma recomendação ou identificação sobre qual aparelho é mais adequado para uso em filmes, uma soundbar ou uma caixa Bluetooth da JBL/Harman. Portanto, está relacionado a saber o que é mais apropriado neste contexto.		t3_1fu36c0
		t3_1ftz5zu	Vc acha possível ganhar na mega sena?	FALSE			reddit	vc acha possivel ganhar na mega sena	vc acha possivel ganhar na mega sena	['vc', 'acha', 'possivel', 'ganhar', 'na', 'mega', 'sena']	vc acha possivel ganhar na mega sena	7	Outro	1	7	A pergunta questiona sobre a possibilidade de ganhar na mega sena, que não se encaixa claramente em nenhuma das categorias predefinidas, pois não está buscando uma ação, justificativa, responsável, local, tempo, método ou custo. É uma pergunta hipotética sobre a possibilidade de um evento aleatório, não ligada diretamente a nenhuma dessas categorias.		t3_1ftz5zu
		t3_1ftvfr6	Porque a vida parece tão simples mas tão complexa ao mesmo tempo?	FALSE			reddit	porque a vida parece tao simples mas tao complexa ao mesmo tempo	porque a vida parece tao simples mas tao complexa ao mesmo tempo	['porque', 'a', 'vida', 'parece', 'tao', 'simples', 'mas', 'tao', 'complexa', 'ao', 'mesmo', 'tempo']	porque a vida parece tao simples mas tao complexa ao mesmo tempo	12	Por quê	0.916667	11	A pergunta está buscando uma justificativa ou explicação para a aparente contradição entre a simplicidade e a complexidade da vida. O uso de "por que" indica que a questão é sobre razões ou motivações, se alinhando com a categoria "Por quê".		t3_1ftvfr6
		t3_1ftsp5v	Em tempos de internet e streaming, você ainda ouve rádio?	FALSE			reddit	em tempos de internet e streaming voce ainda ouve radio	em tempos de internet e streaming voce ainda ouve radio	['em', 'tempos', 'de', 'internet', 'e', 'streaming', 'voce', 'ainda', 'ouve', 'radio']	em tempos de internet e streaming voce ainda ouve radio	10	Outro	1	10	A pergunta "Em tempos de internet e streaming, você ainda ouve rádio?" não se enquadra diretamente em nenhuma das categorias propostas. A pergunta está sondando o comportamento pessoal ou preferência individual do destinatário em relação ao consumo de rádio, o que não se encaixa nas categorias de ação, justificativa, cronologia, técnica, responsabilidade, localização, custo ou quantidade.		t3_1ftsp5v
		t3_1ftzzey	Ideias de janta usando apenas micro-ondas, que não seja comida pronta congelada?	FALSE			reddit	ideias de janta usando apenas microondas que nao seja comida pronta congelada	ideias de janta usando apenas microondas que nao seja comida pronta congelada	['ideias', 'de', 'janta', 'usando', 'apenas', 'microondas', 'que', 'nao', 'seja', 'comida', 'pronta', 'congelada']	ideias de janta usando apenas microondas que nao seja comida pronta congelada	12	O quê	1	12	A pergunta busca por ideias, ou sugestões, de pratos ou receitas que possam ser feitos utilizando um micro-ondas, especificando ainda a condição de não serem refeições prontas e congeladas. Isso enquadra a pergunta em uma situação de identificação ou busca por ações específicas (nesse caso, receitas ou opções de jantar). Portanto, a categoria adequada é "O quê".		t3_1ftzzey
		t3_1ftqw4e	Vou pedir ela em namoro. Devo comprar anel de compromisso?	FALSE			reddit	vou pedir ela em namoro devo comprar anel de compromisso	vou pedir ela em namoro devo comprar anel de compromisso	['vou', 'pedir', 'ela', 'em', 'namoro', 'devo', 'comprar', 'anel', 'de', 'compromisso']	vou pedir ela em namoro devo comprar anel de compromisso	10	O quê	1	10	A pergunta está buscando uma ação a ser executada, que é decidir se deve ou não comprar um anel de compromisso. Portanto, classifica-se como "O quê", pois está relacionado à definição de uma ação.		t3_1ftqw4e
		t3_1fto1mm	É só pra mim? Ou o Reddit começou a traduzir todos os posts de outras línguas?	FALSE			reddit	e so pra mim ou o reddit comecou a traduzir todos os posts de outras linguas	e so pra mim ou o reddit comecou a traduzir todos os posts de outras linguas	['e', 'so', 'pra', 'mim', 'ou', 'o', 'reddit', 'comecou', 'a', 'traduzir', 'todos', 'os', 'posts', 'de', 'outras', 'linguas']	e so pra mim ou o reddit comecou a traduzir todos os posts de outras linguas	16	O quê	1	16	A pergunta busca identificar ou confirmar uma ação específica que está acontecendo no Reddit - a tradução automática dos posts de outras línguas. Isso se enquadra na categoria "O quê", pois está pedindo para verificar ou identificar uma ação ou mudança.		t3_1fto1mm
		t3_1ftr8h4	Você costuma escrever todo dia?	FALSE			reddit	voce costuma escrever todo dia	voce costuma escrever todo dia	['voce', 'costuma', 'escrever', 'todo', 'dia']	voce costuma escrever todo dia	5	Outro	1	5	A pergunta "Você costuma escrever todo dia?" não busca identificar uma ação específica a ser executada, justificativa, responsável, localização, tempo, método ou custo. Trata-se de uma pergunta sobre o hábito pessoal do interlocutor, indagando sobre a frequência de um comportamento específico (escrever todos os dias). Portanto, não se encaixa claramente em nenhuma das categorias fornecidas.		t3_1ftr8h4
		t3_1ftm4q3	Vale apena usar o Gemini?	FALSE			reddit	vale apena usar o gemini	vale apena usar o gemini	['vale', 'apena', 'usar', 'o', 'gemini']	vale apena usar o gemini	5	O quê	1	5	A pergunta "Vale apena usar o Gemini?" busca entender se a ação de usar o Gemini é recomendada ou não, referindo-se à decisão e avaliação do uso dessa ferramenta ou tecnologia. Portanto, está ligada à busca de uma recomendação ou identificação de ação a ser executada, enquadrando-se na categoria "O quê".		t3_1ftm4q3
		t3_1ft9v3f	Você gostaria de ter um filho igual a si mesmo ?	FALSE			reddit	voce gostaria de ter um filho igual a si mesmo	voce gostaria de ter um filho igual a si mesmo	['voce', 'gostaria', 'de', 'ter', 'um', 'filho', 'igual', 'a', 'si', 'mesmo']	voce gostaria de ter um filho igual a si mesmo	10	Outro	1	10	A pergunta "Você gostaria de ter um filho igual a si mesmo?" não se encaixa diretamente em nenhuma das categorias fornecidas, pois não está buscando uma ação específica a ser executada, nem solicitando informações sobre justificação, responsáveis, localização, tempo, métodos ou custos. É uma pergunta hipotética ou reflexiva, que convida à introspecção pessoal ou à expressão de preferência, e, por…		t3_1ft9v3f
		t3_1fszz0n	Conte-me algum relato sobrenatural que vc passou?	FALSE			reddit	conteme algum relato sobrenatural que vc passou	conteme algum relato sobrenatural que vc passou	['conteme', 'algum', 'relato', 'sobrenatural', 'que', 'vc', 'passou']	conteme algum relato sobrenatural que vc passou	7	O quê	1	7	A pergunta está pedindo para que a pessoa conte um relato sobre uma experiência sobrenatural que vivenciou. Isso se enquadra na busca por uma ação específica - a de relatar um evento ou experiência. Portanto, é uma identificação de algo (o relato) que a pessoa tenha vivido.		t3_1fszz0n
		t3_1ftfmci	Estamos voltando pra 2015?	FALSE			reddit	estamos voltando pra 2015	estamos voltando pra 2015	['estamos', 'voltando', 'pra', '2015']	estamos voltando pra 2015	4	Quando	1	4	A pergunta "Estamos voltando pra 2015?" pode ser interpretada como uma indagação sobre uma mudança temporal, questionando se um estado ou condição atual se assemelha ao que era em 2015, sugerindo assim uma comparação de tempo. Portanto, está relacionada a uma questão de ordem cronológica.		t3_1ftfmci
		t3_1ftdblu	Estão animados para o Halloween? ? ? ? ?	FALSE			reddit	estao animados para o halloween	estao animados para o halloween	['estao', 'animados', 'para', 'o', 'halloween']	estao animados para o halloween	5	Outro	1	5	A pergunta "Estão animados para o Halloween?" não se encaixa diretamente em nenhuma das categorias listadas, pois não busca uma ação a ser executada (O quê), uma justificativa ou motivação (Por quê), questiona quem é responsável (Quem), busca um local (Onde), tem cunho cronológico (Quando), investiga um método ou estado (Como), ou envolve custos (Quanto). É uma pergunta sobre estado emocional ou …		t3_1ftdblu
		t3_1ftcbu5	Shifting é real, ou é um delírio coletivo?	FALSE			reddit	shifting e real ou e um delirio coletivo	shifting e real ou e um delirio coletivo	['shifting', 'e', 'real', 'ou', 'e', 'um', 'delirio', 'coletivo']	shifting e real ou e um delirio coletivo	8	Outro	0.875	7	A pergunta busca entender a natureza de "shifting", questionando se é algo real ou se se trata de um delírio coletivo. No entanto, não se enquadra especificamente em nenhuma das categorias listadas, pois não é uma pergunta sobre ação, motivo, responsável, local, tempo, método ou custo. Portanto, é classificada como "Outro".		t3_1ftcbu5
		t3_1ftcqvp	Alguém pode me tirar uma dúvida de História?	FALSE			reddit	alguem pode me tirar uma duvida de historia	alguem pode me tirar uma duvida de historia	['alguem', 'pode', 'me', 'tirar', 'uma', 'duvida', 'de', 'historia']	alguem pode me tirar uma duvida de historia	8	Outro	1	8	A pergunta "Alguém pode me tirar uma dúvida de História?" não fornece informações suficientes para classificá-la nas categorias fornecidas, pois não especifica sobre o que é a dúvida, como, onde, quem, quando, porquê, quanto ou o que está relacionado. É uma pergunta muito aberta e genérica, portanto, não se encaixa claramente em nenhuma das categorias definidas.		t3_1ftcqvp
		t3_1ft9gi3	Que pensamentos e atitudes positivas você costuma ter durante o dia ?	FALSE			reddit	que pensamentos e atitudes positivas voce costuma ter durante o dia	que pensamentos e atitudes positivas voce costuma ter durante o dia	['que', 'pensamentos', 'e', 'atitudes', 'positivas', 'voce', 'costuma', 'ter', 'durante', 'o', 'dia']	que pensamentos e atitudes positivas voce costuma ter durante o dia	11	O quê	1	11	A pergunta está pedindo para identificar quais são os pensamentos e atitudes positivas que a pessoa tem durante o dia. Isso se encaixa na categoria "O quê" porque busca uma ação (pensamentos e atitudes) a ser identificada.		t3_1ft9gi3
		t3_1ft37cu	Tem algum problema ser homem e usar calça legging?	FALSE			reddit	tem algum problema ser homem e usar calca legging	tem algum problema ser homem e usar calca legging	['tem', 'algum', 'problema', 'ser', 'homem', 'e', 'usar', 'calca', 'legging']	tem algum problema ser homem e usar calca legging	9	O quê	1	9	A pergunta está buscando identificar se existe um problema associado à ação de um homem usar calça legging, que está relacionado a uma ação ou situação específica. Portanto, a categoria "O quê" é a mais adequada, pois está relacionada à identificação de um problema ou situação específica.		t3_1ft37cu
		t3_1ft8isd	Alguém ai pra explicar o caso do Diddy?	FALSE			reddit	alguem ai pra explicar o caso do diddy	alguem ai pra explicar o caso do diddy	['alguem', 'ai', 'pra', 'explicar', 'o', 'caso', 'do', 'diddy']	alguem ai pra explicar o caso do diddy	8	O quê	1	8	A pergunta solicita uma explicação sobre o "caso do Diddy", o que indica uma busca por informações ou definição do que ocorreu nesse caso específico. Está interessada em saber a ação, evento ou situação envolvendo Diddy, o que se enquadra na categoria "O quê".		t3_1ft8isd
		t3_1ft5c5b	Já é possivel contratar drones para arremessar mijo e fezes em pessoas cretinas com provas concretas?	FALSE			reddit	ja e possivel contratar drones para arremessar mijo e fezes em pessoas cretinas com provas concretas	ja e possivel contratar drones para arremessar mijo e fezes em pessoas cretinas com provas concretas	['ja', 'e', 'possivel', 'contratar', 'drones', 'para', 'arremessar', 'mijo', 'e', 'fezes', 'em', 'pessoas', 'cretinas', 'com', 'provas', 'concretas']	ja e possivel contratar drones para arremessar mijo e fezes em pessoas cretinas com provas concretas	16	O quê	0.9375	15	A pergunta está buscando a identificação de um serviço/especificidade - a capacidade de contratar drones para um fim específico (arremessar mijo e fezes em pessoas). Isso se encaixa na categoria "O quê", pois está perguntando sobre a viabilidade ou existência de uma ação ou serviço.		t3_1ft5c5b
		t3_1ft9rl0	Alguem ai recomenda alguma série ou filme que ensine coisas uteis sobre a vida?	FALSE			reddit	alguem ai recomenda alguma serie ou filme que ensine coisas uteis sobre a vida	alguem ai recomenda alguma serie ou filme que ensine coisas uteis sobre a vida	['alguem', 'ai', 'recomenda', 'alguma', 'serie', 'ou', 'filme', 'que', 'ensine', 'coisas', 'uteis', 'sobre', 'a', 'vida']	alguem ai recomenda alguma serie ou filme que ensine coisas uteis sobre a vida	14	O quê	1	14	A pergunta busca uma recomendação de uma série ou filme que ensine coisas úteis sobre a vida, o que se enquadra em "o quê", pois está pedindo uma identificação ou sugestão de algo específico a ser assistido.		t3_1ft9rl0
		t3_1ftbsju	Canais de reação de vídeos terror, sem crime ?	FALSE			reddit	canais de reacao de videos terror sem crime	canais de reacao de videos terror sem crime	['canais', 'de', 'reacao', 'de', 'videos', 'terror', 'sem', 'crime']	canais de reacao de videos terror sem crime	8	Outro	0.875	7	A pergunta "Canais de reação de vídeos terror, sem crime?" não se encaixa claramente em nenhuma das categorias especificadas. A pergunta não fornece um contexto claro que permita inferir se está buscando uma explicação, um responsável, um local, um tempo, como algo acontece, ou outros aspectos relacionados às classificações apresentadas. Parece tratar-se de uma declaração ou busca por uma recomen…		t3_1ftbsju
		t3_1fsru4h	Você ainda estaria com seu parceiro(a) se ele(a) não tivesse dinheiro?	FALSE			reddit	voce ainda estaria com seu parceiroa se elea nao tivesse dinheiro	voce ainda estaria com seu parceiroa se elea nao tivesse dinheiro	['voce', 'ainda', 'estaria', 'com', 'seu', 'parceiroa', 'se', 'elea', 'nao', 'tivesse', 'dinheiro']	voce ainda estaria com seu parceiroa se elea nao tivesse dinheiro	11	Outro	1	11	A pergunta explora uma suposição hipotética sobre um relacionamento amoroso sem uma condição financeira específica, mas não se enquadra claramente em nenhuma das categorias fornecidas, pois não busca uma ação, justificativa específica, identificação de alguém, lugar, momento específico, método, ou custo. É mais uma reflexão pessoal que não se alinha diretamente às categorias detalhadas.		t3_1fsru4h
		t3_1ft9b86	Existe alguma comunidade de herpes HSV-1/HSV-2 em ptbr?	FALSE			reddit	existe alguma comunidade de herpes hsv1hsv2 em ptbr	existe alguma comunidade de herpes hsv1hsv2 em ptbr	['existe', 'alguma', 'comunidade', 'de', 'herpes', 'hsv1hsv2', 'em', 'ptbr']	existe alguma comunidade de herpes hsv1hsv2 em ptbr	8	Onde	1	8	A pergunta busca saber a localização de uma comunidade específica que discute herpes HSV-1/HSV-2 em português, indicando uma preocupação sobre onde encontrar tal grupo, se ele existe. Portanto, se encaixa na categoria "Onde", pois refere-se à busca por um local (neste caso, uma comunidade online ou física).		t3_1ft9b86
		t3_1fssl2g	Oque deu um 360° na sua vida desde que você era mais novo pra cá?	FALSE			reddit	oque deu um 360 na sua vida desde que voce era mais novo pra ca	oque deu um 360 na sua vida desde que voce era mais novo pra ca	['oque', 'deu', 'um', '360', 'na', 'sua', 'vida', 'desde', 'que', 'voce', 'era', 'mais', 'novo', 'pra', 'ca']	oque deu um 360 na sua vida desde que voce era mais novo pra ca	15	O quê	1	15	A pergunta busca identificar o evento ou mudança significativa que ocorreu na vida de alguém, desde que era mais jovem até o momento presente. Portanto, trata-se de identificar uma ação ou evento responsável por uma transformação significativa, encaixando-se melhor na categoria "O quê".		t3_1fssl2g
		t3_1fszhnf	Berserk merece um remake da segunda temporada? Oque acham?	FALSE			reddit	berserk merece um remake da segunda temporada oque acham	berserk merece um remake da segunda temporada oque acham	['berserk', 'merece', 'um', 'remake', 'da', 'segunda', 'temporada', 'oque', 'acham']	berserk merece um remake da segunda temporada oque acham	9	O quê	1	9	A pergunta está buscando opiniões ou ideias sobre a ação de dar um remake para a segunda temporada de Berserk, o que se alinha com perguntas que buscam uma ação a ser executada ou uma avaliação sobre a necessidade de uma ação específica.		t3_1fszhnf
		t3_1ft8c57	Vc tbm sente vergonha alheia de gente que não entende ironia(com exceção de autistas, é claro)?	FALSE			reddit	vc tbm sente vergonha alheia de gente que nao entende ironiacom excecao de autistas e claro	vc tbm sente vergonha alheia de gente que nao entende ironiacom excecao de autistas e claro	['vc', 'tbm', 'sente', 'vergonha', 'alheia', 'de', 'gente', 'que', 'nao', 'entende', 'ironiacom', 'excecao', 'de', 'autistas', 'e', 'claro']	vc tbm sente vergonha alheia de gente que nao entende ironiacom excecao de autistas e claro	16	Quem	0.9375	15	A pergunta está inquirindo sobre quem (no sentido de um grupo de pessoas) sente vergonha alheia de gente que não entende ironia. A menção de "você" implica em uma autoidentificação ou identificação de outras pessoas que compartilham esse sentimento. Portanto, a questão principal é sobre quem experimenta essa emoção específica.		t3_1ft8c57
		t3_1ft7czp	As gostosas que você conhece são burras?	FALSE			reddit	as gostosas que voce conhece sao burras	as gostosas que voce conhece sao burras	['as', 'gostosas', 'que', 'voce', 'conhece', 'sao', 'burras']	as gostosas que voce conhece sao burras	7	Quem	1	7	A pergunta está indagando sobre a característica (inteligência ou burrice) de um grupo específico de pessoas ("as gostosas que você conhece"). Embora não identifique diretamente o responsável por uma ação, a pergunta está centrada em um grupo de indivíduos específicos, tornando-se uma questão sobre "quem" em termos de características pessoais.		t3_1ft7czp
		t3_1ft6oxu	Você sabe os nomes de todas as ruas do seu bairro?	FALSE			reddit	voce sabe os nomes de todas as ruas do seu bairro	voce sabe os nomes de todas as ruas do seu bairro	['voce', 'sabe', 'os', 'nomes', 'de', 'todas', 'as', 'ruas', 'do', 'seu', 'bairro']	voce sabe os nomes de todas as ruas do seu bairro	11	O quê	1	11	A pergunta está inquirindo sobre a identificação de todas as ruas em um bairro específico. Isso se enquadra na categoria "O quê", pois busca saber quais são os nomes das ruas, relacionadas à identificação de algo.		t3_1ft6oxu
		t3_1ft12r4	Alguém que pratique Baseball ou Que tenha um taco?	FALSE			reddit	alguem que pratique baseball ou que tenha um taco	alguem que pratique baseball ou que tenha um taco	['alguem', 'que', 'pratique', 'baseball', 'ou', 'que', 'tenha', 'um', 'taco']	alguem que pratique baseball ou que tenha um taco	9	Quem	0.888889	8	A pergunta está buscando identificar pessoas específicas, ou seja, quem pratica Baseball ou possui um taco. É uma tentativa de descobrir quem se encaixa nessas descrições.		t3_1ft12r4
		t3_1fsv1fz	Você faria novamente, do zero, uma graduação caso você não tenha feito ela bem feita?	FALSE			reddit	voce faria novamente do zero uma graduacao caso voce nao tenha feito ela bem feita	voce faria novamente do zero uma graduacao caso voce nao tenha feito ela bem feita	['voce', 'faria', 'novamente', 'do', 'zero', 'uma', 'graduacao', 'caso', 'voce', 'nao', 'tenha', 'feito', 'ela', 'bem', 'feita']	voce faria novamente do zero uma graduacao caso voce nao tenha feito ela bem feita	15	Outro	0.933333	14	A pergunta "Você faria novamente, do zero, uma graduação caso você não tenha feito ela bem feita?" parece ser uma pergunta reflexiva ou hipotética, pedindo uma opinião ou decisão pessoal sobre repetir ou não uma ação passada. Ela não busca uma resposta objetiva sobre ação, motivo, responsável, localização, tempo, método ou custo, mas sim explora uma escolha pessoal hipotética, o que não se encaix…		t3_1fsv1fz
		t3_1fsthmt	Porque blogueiros que são apenas garotos propaganda de empresas, tem um hype e importância tão elevada na sociedade e pra opinião pública ?	FALSE			reddit	porque blogueiros que sao apenas garotos propaganda de empresas tem um hype e importancia tao elevada na sociedade e pra opiniao publica	porque blogueiros que sao apenas garotos propaganda de empresas tem um hype e importancia tao elevada na sociedade e pra opiniao publica	['porque', 'blogueiros', 'que', 'sao', 'apenas', 'garotos', 'propaganda', 'de', 'empresas', 'tem', 'um', 'hype', 'e', 'importancia', 'tao', 'elevada', 'na', 'sociedade', 'e', 'pra', 'opiniao', 'publica']	porque blogueiros que sao apenas garotos propaganda de empresas tem um hype e importancia tao elevada na sociedade e pra opiniao publica	22	Por quê	0.954545	21	A pergunta está buscando uma justificativa ou razão para o fenômeno de blogueiros, que atuam como garotos propaganda, terem tanta credibilidade e importância na sociedade. A pessoa quer entender o motivo por trás desse comportamento ou status atribuído a esses influenciadores.		t3_1fsthmt
		t3_1fsvx65	Existe algum sub-reddit para comerciantes se ajudarem dando dicas entre outras coisas?	FALSE			reddit	existe algum subreddit para comerciantes se ajudarem dando dicas entre outras coisas	existe algum subreddit para comerciantes se ajudarem dando dicas entre outras coisas	['existe', 'algum', 'subreddit', 'para', 'comerciantes', 'se', 'ajudarem', 'dando', 'dicas', 'entre', 'outras', 'coisas']	existe algum subreddit para comerciantes se ajudarem dando dicas entre outras coisas	12	Onde	1	12	A pergunta está buscando a localização de um sub-reddit específico que serve para comerciantes se ajudarem e darem dicas, portanto, o foco está em encontrar um lugar ou espaço online específico onde essa troca de dicas acontece. Isso se alinha com perguntas que buscam indicações sobre lugares para fins específicos.		t3_1fsvx65
		t3_1fsivhc	Porque a volta é sempre mais rápida?	FALSE			reddit	porque a volta e sempre mais rapida	porque a volta e sempre mais rapida	['porque', 'a', 'volta', 'e', 'sempre', 'mais', 'rapida']	porque a volta e sempre mais rapida	7	Por quê	1	7	A pergunta busca uma justificativa ou motivo para entender por que, em certas situações, o retorno é mais rápido em comparação à ida. Isso envolve uma busca por razões, causas ou explicações, encaixando-se, portanto, na categoria "Por quê".		t3_1fsivhc
		t3_1fsm7q8	Porque em alguns posts dá para ver a quantidade de upvote/downvote nos comentário e em outro não?	FALSE			reddit	porque em alguns posts da para ver a quantidade de upvotedownvote nos comentario e em outro nao	porque em alguns posts da para ver a quantidade de upvotedownvote nos comentario e em outro nao	['porque', 'em', 'alguns', 'posts', 'da', 'para', 'ver', 'a', 'quantidade', 'de', 'upvotedownvote', 'nos', 'comentario', 'e', 'em', 'outro', 'nao']	porque em alguns posts da para ver a quantidade de upvotedownvote nos comentario e em outro nao	17	Por quê	0.941176	16	A pergunta busca obter uma justificativa ou motivo para a diferença na visibilidade da quantidade de upvotes e downvotes em comentários de diferentes posts. Ela está questionando a razão pela qual isso ocorre, ou seja, está em busca de uma explicação ou motivo para essa situação.		t3_1fsm7q8
		t3_1fsz3tw	O Ronaldo(Gato Galáctico)foi cancelado alguns meses atrás por beber leite puro mesmo ou foi delírio coletivo?	FALSE			reddit	o ronaldogato galacticofoi cancelado alguns meses atras por beber leite puro mesmo ou foi delirio coletivo	o ronaldogato galacticofoi cancelado alguns meses atras por beber leite puro mesmo ou foi delirio coletivo	['o', 'ronaldogato', 'galacticofoi', 'cancelado', 'alguns', 'meses', 'atras', 'por', 'beber', 'leite', 'puro', 'mesmo', 'ou', 'foi', 'delirio', 'coletivo']	o ronaldogato galacticofoi cancelado alguns meses atras por beber leite puro mesmo ou foi delirio coletivo	16	Quem	1	16	A pergunta busca saber quem foi cancelado, sendo neste caso o Ronaldo, também conhecido como Gato Galáctico. O foco está em identificar quem foi alvo de um cancelamento (real ou não), portanto, a categoria adequada é "Quem".		t3_1fsz3tw
		t3_1fse625	Vocês prefeririam nascer com muita beleza e com extrema dificuldade de comunicação, ou com bastante feiura, mas com uma habilidade social muito acima da média ????	FALSE			reddit	voces prefeririam nascer com muita beleza e com extrema dificuldade de comunicacao ou com bastante feiura mas com uma habilidade social muito acima da media	voces prefeririam nascer com muita beleza e com extrema dificuldade de comunicacao ou com bastante feiura mas com uma habilidade social muito acima da media	['voces', 'prefeririam', 'nascer', 'com', 'muita', 'beleza', 'e', 'com', 'extrema', 'dificuldade', 'de', 'comunicacao', 'ou', 'com', 'bastante', 'feiura', 'mas', 'com', 'uma', 'habilidade', 'social', 'muito', 'acima', 'da', 'media']	voces prefeririam nascer com muita beleza e com extrema dificuldade de comunicacao ou com bastante feiura mas com uma habilidade social muito acima da media	25	Outro	0.88	22	A pergunta apresentada não busca informações sobre ações, justificativas, autores, locais, momentos, métodos ou custos. Ela propõe um dilema hipotético sobre preferências pessoais, colocando em comparação características de beleza e habilidades sociais. Portanto, não se encaixa em nenhuma das categorias fornecidas de forma clara, sendo mais adequada à categoria "Outro".		t3_1fse625
		t3_1fsp4ge	Você é uma pessoa que tem amigos, porém, solitária?	FALSE			reddit	voce e uma pessoa que tem amigos porem solitaria	voce e uma pessoa que tem amigos porem solitaria	['voce', 'e', 'uma', 'pessoa', 'que', 'tem', 'amigos', 'porem', 'solitaria']	voce e uma pessoa que tem amigos porem solitaria	9	Outro	1	9	A pergunta parece estar mais relacionada a uma reflexão pessoal ou estado emocional do que a qualquer uma das categorias padrão de perguntas sobre informações factuais ou metodológicas. É uma questão introspectiva que não busca uma ação, justificação, identificação, localização, cronologia, método ou quantificação específica. Portanto, não se encaixa claramente em nenhuma das categorias definidas.		t3_1fsp4ge
		t3_1fskfom	Você é metrossexual?	FALSE			reddit	voce e metrossexual	voce e metrossexual	['voce', 'e', 'metrossexual']	voce e metrossexual	3	Outro	1	3	A pergunta "Você é metrossexual?" não se encaixa em nenhuma das categorias fornecidas, pois trata-se de uma pergunta pessoal sobre identidade ou estilo de vida, e não busca uma ação, justificativa, cronologia, método, localização, quantidade ou responsável. Portanto, classifica-se como "Outro".		t3_1fskfom
		t3_1fsxtks	Você também odeia ser pobre?	FALSE			reddit	voce tambem odeia ser pobre	voce tambem odeia ser pobre	['voce', 'tambem', 'odeia', 'ser', 'pobre']	voce tambem odeia ser pobre	5	Outro	1	5	A pergunta não se encaixa em nenhuma das categorias especificadas. Ela não busca uma ação a ser executada, uma justificativa, identificação de responsável, localização, cronologia, método ou custo. É uma pergunta subjetiva que expressa uma opinião ou sentimento pessoal, solicitando uma resposta igualmente subjetiva sobre o sentimento de 'odiar ser pobre'. Portanto, ela não se classifica em nenhum…		t3_1fsxtks
		t3_1fso6kk	Vocês ficaram com alguma sequela da covid?	FALSE			reddit	voces ficaram com alguma sequela da covid	voces ficaram com alguma sequela da covid	['voces', 'ficaram', 'com', 'alguma', 'sequela', 'da', 'covid']	voces ficaram com alguma sequela da covid	7	Como	1	7	A pergunta "Vocês ficaram com alguma sequela da covid?" está inquirindo sobre o estado das pessoas após terem contraído a Covid-19, mais especificamente se desenvolveram algum efeito ou condição residual. Isso cai na categoria de "Como" pois se relaciona a entender o estado ou condição atual das pessoas após um evento - neste caso, após terem tido Covid-19.		t3_1fso6kk
		t3_1fsj68d	Já falaram mal de voce na frente das suas costas?	FALSE			reddit	ja falaram mal de voce na frente das suas costas	ja falaram mal de voce na frente das suas costas	['ja', 'falaram', 'mal', 'de', 'voce', 'na', 'frente', 'das', 'suas', 'costas']	ja falaram mal de voce na frente das suas costas	10	Outro	1	10	A pergunta "Já falaram mal de voce na frente das suas costas?" não se enquadra diretamente em nenhuma das categorias especificadas. A questão é mais uma expressão coloquial ou confusa que não busca diretamente uma ação a ser executada, uma justificativa, identificação de responsável, localização, temporalidade, método, ou custo. É mais uma pergunta sobre experiências de vida pessoal.		t3_1fsj68d
		t3_1fsbo9h	Sugestões de coisas legais pra fazer em call com alguém?	FALSE			reddit	sugestoes de coisas legais pra fazer em call com alguem	sugestoes de coisas legais pra fazer em call com alguem	['sugestoes', 'de', 'coisas', 'legais', 'pra', 'fazer', 'em', 'call', 'com', 'alguem']	sugestoes de coisas legais pra fazer em call com alguem	10	O quê	1	10	A pergunta está pedindo sugestões de atividades ou ações que podem ser feitas durante uma chamada com alguém. Isso se enquadra na categoria "O quê", pois a pessoa está buscando ideias sobre quais ações podem ser realizadas.		t3_1fsbo9h
		t3_1fsh31s	Voces imaginam as pessoas aqui consoante os seus respetivos avatares?	FALSE			reddit	voces imaginam as pessoas aqui consoante os seus respetivos avatares	voces imaginam as pessoas aqui consoante os seus respetivos avatares	['voces', 'imaginam', 'as', 'pessoas', 'aqui', 'consoante', 'os', 'seus', 'respetivos', 'avatares']	voces imaginam as pessoas aqui consoante os seus respetivos avatares	10	Outro	1	10	A pergunta trata sobre a imaginação pessoal das "pessoas aqui" de acordo com os "seus respetivos avatares", algo que não se encaixa nas categorias padrão de ações, motivos, responsáveis, locais, tempos, métodos, ou custos. É uma questão subjetiva sobre a percepção e não se enquadra em nenhuma das categorias específicas fornecidas.		t3_1fsh31s
		t3_1fseshf	Vocês gostaria de viver até os 100 anos ? Vocês teriam forças para realizarem atividade sozinhas, mas obviamente estariam sem beleza. Iai, iam querer ?	FALSE			reddit	voces gostaria de viver ate os 100 anos voces teriam forcas para realizarem atividade sozinhas mas obviamente estariam sem beleza iai iam querer	voces gostaria de viver ate os 100 anos voces teriam forcas para realizarem atividade sozinhas mas obviamente estariam sem beleza iai iam querer	['voces', 'gostaria', 'de', 'viver', 'ate', 'os', '100', 'anos', 'voces', 'teriam', 'forcas', 'para', 'realizarem', 'atividade', 'sozinhas', 'mas', 'obviamente', 'estariam', 'sem', 'beleza', 'iai', 'iam', 'querer']	voces gostaria de viver ate os 100 anos voces teriam forcas para realizarem atividade sozinhas mas obviamente estariam sem beleza iai iam querer	23	Outro	0.956522	22	A pergunta não se encaixa nas categorizações propostas, pois trata-se de uma reflexão pessoal sobre longevidade, capacidades físicas e percepção de beleza, ao invés de uma busca por informações específicas dentro das categorias que incluem ações, justificativas, responsáveis, locais, tempo, métodos ou custos.		t3_1fseshf
		t3_1fsg7fo	Se segurança é dever do estado, então se alguém for assaltado ele pode /deve processar o estado?	FALSE			reddit	se seguranca e dever do estado entao se alguem for assaltado ele pode deve processar o estado	se seguranca e dever do estado entao se alguem for assaltado ele pode deve processar o estado	['se', 'seguranca', 'e', 'dever', 'do', 'estado', 'entao', 'se', 'alguem', 'for', 'assaltado', 'ele', 'pode', 'deve', 'processar', 'o', 'estado']	se seguranca e dever do estado entao se alguem for assaltado ele pode deve processar o estado	17	O quê	0.882353	15	A pergunta está buscando saber qual a ação que pode ou deve ser tomada em relação a um incidente específico (ser assaltado), questionando se há a possibilidade ou necessidade de processar o estado. A intenção é identificar a ação cabível diante do dever do estado em prover segurança.		t3_1fsg7fo
		t3_1fsk3ui	Alguem ai recomenda algum site de chat de psicológico online gratuito?	FALSE			reddit	alguem ai recomenda algum site de chat de psicologico online gratuito	alguem ai recomenda algum site de chat de psicologico online gratuito	['alguem', 'ai', 'recomenda', 'algum', 'site', 'de', 'chat', 'de', 'psicologico', 'online', 'gratuito']	alguem ai recomenda algum site de chat de psicologico online gratuito	11	Onde	0.909091	10	A pergunta está pedindo indicações sobre locais virtuais (sites) específicos onde pode-se encontrar serviços de chat psicológico online gratuito. Isso se encaixa na categoria "Onde", pois trata-se de uma solicitação de indicação de lugares com um propósito específico.		t3_1fsk3ui
		t3_1fsi4o2	Faço uso de concerta para tratamento do TDAH. Posso iniciar tratamento com minoxidil junto?	FALSE			reddit	faco uso de concerta para tratamento do tdah posso iniciar tratamento com minoxidil junto	faco uso de concerta para tratamento do tdah posso iniciar tratamento com minoxidil junto	['faco', 'uso', 'de', 'concerta', 'para', 'tratamento', 'do', 'tdah', 'posso', 'iniciar', 'tratamento', 'com', 'minoxidil', 'junto']	faco uso de concerta para tratamento do tdah posso iniciar tratamento com minoxidil junto	14	Como	0.928571	13	A pergunta busca saber se o início de um tratamento com minoxidil pode ser feito concomitantemente com o uso de concerta, atentando-se para a compatibilidade ou método adequado para realizar ambos os tratamentos simultaneamente. Assim, a questão trata do “como” em relação à execução de tratamentos médicos simultâneos.		t3_1fsi4o2
		t3_1fsi2bo	Oq faz um Homem com H maiúsculo?	FALSE			reddit	oq faz um homem com h maiusculo	oq faz um homem com h maiusculo	['oq', 'faz', 'um', 'homem', 'com', 'h', 'maiusculo']	oq faz um homem com h maiusculo	7	O quê	1	7	A pergunta busca identificar ou definir quais atributos, ações ou características qualificam um "Homem com H maiúsculo". Ela está explorando o que determina ou faz um homem ser considerado assim, se concentrando em aspectos ou comportamentos que definiriam essa expressão. Portanto, a resposta esperada indica o que é necessário para ser um "Homem com H maiúsculo".		t3_1fsi2bo
		t3_1fs716s	Uma cerveja antes do almoço é muito bom pra ficar pensando melhor?	FALSE			reddit	uma cerveja antes do almoco e muito bom pra ficar pensando melhor	uma cerveja antes do almoco e muito bom pra ficar pensando melhor	['uma', 'cerveja', 'antes', 'do', 'almoco', 'e', 'muito', 'bom', 'pra', 'ficar', 'pensando', 'melhor']	uma cerveja antes do almoco e muito bom pra ficar pensando melhor	12	Outro	1	12	A pergunta "Uma cerveja antes do almoço é muito bom pra ficar pensando melhor?" não se encaixa em nenhuma das categorias apresentadas, pois não se trata de questionar sobre ação, justificativa, pessoa, local, tempo, método ou custo. Parece ser uma frase afirmativa em forma de pergunta, buscando, talvez, validação ou opiniões. Portanto, não se enquadra nas categorias dadas.		t3_1fs716s
		t3_1fs50br	nesse domingo oq ta faltando pra vc pra compoletar/melhorar o dia?	FALSE			reddit	nesse domingo oq ta faltando pra vc pra compoletarmelhorar o dia	nesse domingo oq ta faltando pra vc pra compoletarmelhorar o dia	['nesse', 'domingo', 'oq', 'ta', 'faltando', 'pra', 'vc', 'pra', 'compoletarmelhorar', 'o', 'dia']	nesse domingo oq ta faltando pra vc pra compoletarmelhorar o dia	11	Outro	0.909091	10	A pergunta questiona o que está faltando para completar ou melhorar o dia da pessoa no domingo. Apesar de mencionar "o que", a estrutura informal e a natureza subjetiva da pergunta, que se refere a sentimentos ou necessidades pessoais, não se encaixa perfeitamente em nenhuma das categorias predefinidas, que são mais objetivas e específicas. Por isso, a melhor classificação é "Outro".		t3_1fs50br
		t3_1fs7tna	Coloquei uma calça na máquina sem me atentar que só podia lavar a seco. Será que estraguei?	FALSE			reddit	coloquei uma calca na maquina sem me atentar que so podia lavar a seco sera que estraguei	coloquei uma calca na maquina sem me atentar que so podia lavar a seco sera que estraguei	['coloquei', 'uma', 'calca', 'na', 'maquina', 'sem', 'me', 'atentar', 'que', 'so', 'podia', 'lavar', 'a', 'seco', 'sera', 'que', 'estraguei']	coloquei uma calca na maquina sem me atentar que so podia lavar a seco sera que estraguei	17	Outro	0.941176	16	A pergunta "Coloquei uma calça na máquina sem me atentar que só podia lavar a seco. Será que estraguei?" não se encaixa claramente em nenhuma das categorias especificadas. Ela expressa uma preocupação ou dúvida sobre o estado da calça após ter sido lavada de maneira inadequada, mas não pergunta diretamente o quê fazer, por que, quem, onde, quando, como ou quanto, mas sim expressa uma incerteza ou…		t3_1fs7tna
		t3_1frzeb9	Você é filiado a algum partido político? Se não, pretende se filiar algum dia?	FALSE			reddit	voce e filiado a algum partido politico se nao pretende se filiar algum dia	voce e filiado a algum partido politico se nao pretende se filiar algum dia	['voce', 'e', 'filiado', 'a', 'algum', 'partido', 'politico', 'se', 'nao', 'pretende', 'se', 'filiar', 'algum', 'dia']	voce e filiado a algum partido politico se nao pretende se filiar algum dia	14	Outro	0.857143	12	A pergunta "Você é filiado a algum partido político? Se não, pretende se filiar algum dia?" não se encaixa diretamente em nenhuma das categorias especificadas. A primeira parte da pergunta ("Você é filiado a algum partido político?") poderia ser uma pergunta de identificação ("O quê"), mas a segunda parte não cabe em nenhuma das categorias e trata de uma intenção ou decisão pessoal, que não está …		t3_1frzeb9
		t3_1frpfsx	Você é uma pessoa mais colorida ou mais dark?	FALSE			reddit	voce e uma pessoa mais colorida ou mais dark	voce e uma pessoa mais colorida ou mais dark	['voce', 'e', 'uma', 'pessoa', 'mais', 'colorida', 'ou', 'mais', 'dark']	voce e uma pessoa mais colorida ou mais dark	9	Outro	0.888889	8	A pergunta "Você é uma pessoa mais colorida ou mais dark?" refere-se à preferência pessoal ou estilo individual de alguém, o que não se encaixa em nenhuma das categorias pré-definidas como O quê, Por quê, Quem, Onde, Quando, Como ou Quanto. Esta pergunta parece ser mais introspectiva e está mais relacionada a autoidentidade ou autopercepção.		t3_1frpfsx
		t3_1frvkxy	Estamos vivendo a geração bet?	FALSE			reddit	estamos vivendo a geracao bet	estamos vivendo a geracao bet	['estamos', 'vivendo', 'a', 'geracao', 'bet']	estamos vivendo a geracao bet	5	Outro	1	5	A pergunta "Estamos vivendo a geração bet?" não se encaixa diretamente em nenhuma das categorias especificadas. Não busca uma ação específica (O quê), nem uma justificativa (Por quê), um responsável (Quem), um lugar (Onde), uma cronologia (Quando), um método ou estado (Como), ou um custo (Quanto). A pergunta é mais uma reflexão ou afirmação sobre a sociedade e a geração atual, sem solicitar uma i…		t3_1frvkxy
		t3_1frtah6	Oque você mais queria que fosse fácil comprar pela Internet?	FALSE			reddit	oque voce mais queria que fosse facil comprar pela internet	oque voce mais queria que fosse facil comprar pela internet	['oque', 'voce', 'mais', 'queria', 'que', 'fosse', 'facil', 'comprar', 'pela', 'internet']	oque voce mais queria que fosse facil comprar pela internet	10	O quê	1	10	A pergunta busca identificar um objeto ou algo específico que a pessoa gostaria de comprar pela internet. Está solicitando informação sobre algum item desejado ou a ação de comprar algo, portanto, se enquadra na categoria "O quê".		t3_1frtah6
		t3_1frsrni	Você já se encontrou em uma situação "paranormal"??	FALSE			reddit	voce ja se encontrou em uma situacao paranormal	voce ja se encontrou em uma situacao paranormal	['voce', 'ja', 'se', 'encontrou', 'em', 'uma', 'situacao', 'paranormal']	voce ja se encontrou em uma situacao paranormal	8	Outro	1	8	A pergunta questiona se alguém já teve uma experiência pessoal em uma situação classificada como "paranormal". A classificação não cai em nenhuma das categorias detalhadas (O quê, Por quê, Quem, Onde, Quando, Como, Quanto) pois não busca identificar uma ação, justificativa, responsável, local, cronologia, método, ou custo. É uma pergunta sobre experiências pessoais ou percepções individuais, que …		t3_1frsrni
		t3_1frsgyg	você já viu uma estrela cadente?	FALSE			reddit	voce ja viu uma estrela cadente	voce ja viu uma estrela cadente	['voce', 'ja', 'viu', 'uma', 'estrela', 'cadente']	voce ja viu uma estrela cadente	6	Outro	1	6	A pergunta "você já viu uma estrela cadente?" não se enquadra nas categorias especificadas pois não está focada em obter uma informação prática, cronológica, ou de localização. É uma pergunta pessoal sobre a experiência individual de ver uma estrela cadente, sem implicação direta com ações, justificativas, responsáveis, lugares, tempos, métodos, ou custos.		t3_1frsgyg
		t3_1frczhb	Quantas pessoas que vocês conhecem digitam deslizando o dedo sobre o teclado do celular?	FALSE			reddit	quantas pessoas que voces conhecem digitam deslizando o dedo sobre o teclado do celular	quantas pessoas que voces conhecem digitam deslizando o dedo sobre o teclado do celular	['quantas', 'pessoas', 'que', 'voces', 'conhecem', 'digitam', 'deslizando', 'o', 'dedo', 'sobre', 'o', 'teclado', 'do', 'celular']	quantas pessoas que voces conhecem digitam deslizando o dedo sobre o teclado do celular	14	Quanto	0.928571	13	A pergunta está interessada na quantidade de pessoas que têm o hábito de digitar deslizando o dedo sobre o teclado do celular. Isso remete à ideia de quantificação, tornando a categoria "Quanto" a mais adequada.		t3_1frczhb
		t3_1frphs4	É mesmo uma merda morar em Paranaguá?	FALSE			reddit	e mesmo uma merda morar em paranagua	e mesmo uma merda morar em paranagua	['e', 'mesmo', 'uma', 'merda', 'morar', 'em', 'paranagua']	e mesmo uma merda morar em paranagua	7	Outro	1	7	A pergunta não se encaixa em nenhuma das categorias listadas. Não está buscando uma ação ou identificação (O quê), justificativa (Por quê), responsável (Quem), localização (Onde), informações cronológicas (Quando), método (Como) ou custo (Quanto). É uma pergunta de opinião, que não se enquadra nas categorias definidas.		t3_1frphs4
		t3_1frkcua	oq vcs al mossaram hj?	FALSE			reddit	oq vcs al mossaram hj	oq vcs al mossaram hj	['oq', 'vcs', 'al', 'mossaram', 'hj']	oq vcs al mossaram hj	5	O quê	1	5	A pergunta "oq vcs al mossaram hj?" está perguntando sobre o que as pessoas consumiram em uma refeição hoje. Isso se enquadra na categoria "O quê" pois está buscando uma descrição ou identificação de algo específico - neste caso, a comida que foi consumida.		t3_1frkcua
		t3_1fro0uk	Se não fosse o medo quantas religiões sobrariam?	FALSE			reddit	se nao fosse o medo quantas religioes sobrariam	se nao fosse o medo quantas religioes sobrariam	['se', 'nao', 'fosse', 'o', 'medo', 'quantas', 'religioes', 'sobrariam']	se nao fosse o medo quantas religioes sobrariam	8	Outro	1	8	A pergunta "Se não fosse o medo quantas religiões sobrariam?" não se encaixa claramente em nenhuma das categorias estabelecidas. Ela envolve uma especulação filosófica ou hipotética que não busca uma data, método, localização, justificativa direta, responsável, nem envolve uma questão financeira ou de recurso. É mais uma questão de reflexão sobre a influência do medo nas religiões, sem uma respos…		t3_1fro0uk
		t3_1frecld	Tem mais alguém aí que faz tudo com a mão direita, mas escreve com a mão esquerda?	FALSE			reddit	tem mais alguem ai que faz tudo com a mao direita mas escreve com a mao esquerda	tem mais alguem ai que faz tudo com a mao direita mas escreve com a mao esquerda	['tem', 'mais', 'alguem', 'ai', 'que', 'faz', 'tudo', 'com', 'a', 'mao', 'direita', 'mas', 'escreve', 'com', 'a', 'mao', 'esquerda']	tem mais alguem ai que faz tudo com a mao direita mas escreve com a mao esquerda	17	Quem	0.823529	14	A pergunta busca identificar indivíduos que compartilham uma característica específica – usar a mão direita para tudo, exceto para escrever. Portanto, está indagando sobre quem possui essa característica.		t3_1frecld
		t3_1frqczs	Você compartimentaliza seus contatos? Ou você deixa seus amigos conhecerem seus amigos de outros locais?	FALSE			reddit	voce compartimentaliza seus contatos ou voce deixa seus amigos conhecerem seus amigos de outros locais	voce compartimentaliza seus contatos ou voce deixa seus amigos conhecerem seus amigos de outros locais	['voce', 'compartimentaliza', 'seus', 'contatos', 'ou', 'voce', 'deixa', 'seus', 'amigos', 'conhecerem', 'seus', 'amigos', 'de', 'outros', 'locais']	voce compartimentaliza seus contatos ou voce deixa seus amigos conhecerem seus amigos de outros locais	15	Outro	0.733333	11	A pergunta apresentada não se encaixa diretamente nas categorias listadas. Ela está mais relacionada a uma prática ou comportamento pessoal em relação ao gerenciamento de contatos e amigos, e não está perguntando sobre uma ação específica, justificativa, pessoa, lugar, tempo, método ou custo. Portanto, nenhuma das oito categorias propostas cobre adequadamente o contexto dessa pergunta.		t3_1frqczs
		t3_1frclc4	Galera que tem costume de ficar tocando/pegando nos outros: é por ansiedade ou um sinal?	FALSE			reddit	galera que tem costume de ficar tocandopegando nos outros e por ansiedade ou um sinal	galera que tem costume de ficar tocandopegando nos outros e por ansiedade ou um sinal	['galera', 'que', 'tem', 'costume', 'de', 'ficar', 'tocandopegando', 'nos', 'outros', 'e', 'por', 'ansiedade', 'ou', 'um', 'sinal']	galera que tem costume de ficar tocandopegando nos outros e por ansiedade ou um sinal	15	Por quê	1	15	A pergunta busca uma justificativa ou motivação por trás do comportamento de "ficar tocando/pegando nos outros". Isso se alinha com a categoria "Por quê", que envolve perguntas que buscam explicações sobre o motivo ou razão de algo acontecer.		t3_1frclc4
		t3_1frp1gh	Indicações de podcast para ouvir?	FALSE			reddit	indicacoes de podcast para ouvir	indicacoes de podcast para ouvir	['indicacoes', 'de', 'podcast', 'para', 'ouvir']	indicacoes de podcast para ouvir	5	O quê	1	5	A pergunta "Indicações de podcast para ouvir?" está solicitando recomendações ou sugestões de podcasts específicos, que podem ser considerados como objetos ou itens para ouvir. Portanto, ela se encaixa na categoria "O quê", que se refere à identificação de algo.		t3_1frp1gh
		t3_1frokxv	Pasteis de R$15 / R$18 valem a pena ?	FALSE			reddit	pasteis de r$15 r$18 valem a pena	pasteis de r$15 r$18 valem a pena	['pasteis', 'de', 'r$', '15', 'r$', '18', 'valem', 'a', 'pena']	pasteis de r$ 15 r$ 18 valem a pena	9	Outro	0.888889	8	A pergunta não se encaixa perfeitamente nas categorias disponíveis, pois não busca especificar uma ação, justificativa, pessoa, local, tempo, modo ou custo em recursos específicos, como tempo ou dinheiro. O questionamento sobre o valor de pasteis em relação ao preço pago é mais subjetivo, relacionado a uma opinião pessoal ou análise de custo-benefício, sem um foco claro em qualquer uma das catego…		t3_1frokxv
		t3_1frchfu	Alguém pode me explicar porque tão chamando o Kanye West de herói ou algo assim esses dias?	FALSE			reddit	alguem pode me explicar porque tao chamando o kanye west de heroi ou algo assim esses dias	alguem pode me explicar porque tao chamando o kanye west de heroi ou algo assim esses dias	['alguem', 'pode', 'me', 'explicar', 'porque', 'tao', 'chamando', 'o', 'kanye', 'west', 'de', 'heroi', 'ou', 'algo', 'assim', 'esses', 'dias']	alguem pode me explicar porque tao chamando o kanye west de heroi ou algo assim esses dias	17	Por quê	1	17	A pergunta busca a justificativa ou motivo pelo qual as pessoas estão chamando Kanye West de "herói" ou algo semelhante, ou seja, está pedindo uma explicação para o comportamento ou opinião recente das pessoas a respeito do Kanye West.		t3_1frchfu
		t3_1fr4d67	Precisava me livrar dessa agonia e reencontrar um vídeo de dois angolanos se ofendendo de forma muito criativa e humilhante. Alguém sabe?	FALSE			reddit	precisava me livrar dessa agonia e reencontrar um video de dois angolanos se ofendendo de forma muito criativa e humilhante alguem sabe	precisava me livrar dessa agonia e reencontrar um video de dois angolanos se ofendendo de forma muito criativa e humilhante alguem sabe	['precisava', 'me', 'livrar', 'dessa', 'agonia', 'e', 'reencontrar', 'um', 'video', 'de', 'dois', 'angolanos', 'se', 'ofendendo', 'de', 'forma', 'muito', 'criativa', 'e', 'humilhante', 'alguem', 'sabe']	precisava me livrar dessa agonia e reencontrar um video de dois angolanos se ofendendo de forma muito criativa e humilhante alguem sabe	22	Onde	0.909091	20	A pergunta contém um pedido implícito de localização, ou seja, o autor está buscando a localização ou reencaminhamento de um vídeo específico. Embora a palavra "onde" não seja explicitamente utilizada, a intenção de encontrar a localização do vídeo sobressai, indicando que a lacuna na sua informação é a localização. Portanto, a categoria apropriada é "Onde".		t3_1fr4d67
		t3_1fr3ngo	Jogos de desinteresse, instiga ou atrapalha?	FALSE			reddit	jogos de desinteresse instiga ou atrapalha	jogos de desinteresse instiga ou atrapalha	['jogos', 'de', 'desinteresse', 'instiga', 'ou', 'atrapalha']	jogos de desinteresse instiga ou atrapalha	6	Outro	1	6	A pergunta "Jogos de desinteresse, instiga ou atrapalha?" não se encaixa claramente em nenhuma das categorias fornecidas. Está formulada de forma que busca uma opinião sobre o efeito dos jogos de desinteresse, se eles incitam ou prejudicam. As categorias típicas não abordam a natureza subjetiva ou a análise de impacto psicológico ou comportamental que a pergunta sugere.		t3_1fr3ngo
		t3_1fqys9p	oque é uma república? É uma lugar para morar?	FALSE			reddit	oque e uma republica e uma lugar para morar	oque e uma republica e uma lugar para morar	['oque', 'e', 'uma', 'republica', 'e', 'uma', 'lugar', 'para', 'morar']	oque e uma republica e uma lugar para morar	9	O quê	0.777778	7	A pergunta busca identificar o que é uma república, se referindo à definição ou explicação do termo, e faz uma associação se é ou não um lugar para morar. Isso está relacionado à identificação e reconhecimento de algo.		t3_1fqys9p
		t3_1fqnnua	Pra vc, oq caracteriza um "hétero top"?	FALSE			reddit	pra vc oq caracteriza um hetero top	pra vc oq caracteriza um hetero top	['pra', 'vc', 'oq', 'caracteriza', 'um', 'hetero', 'top']	pra vc oq caracteriza um hetero top	7	O quê	1	7	A pergunta busca identificar as características que definem o conceito de um "hétero top". Está pedindo uma descrição ou definição de algo. Portanto, se encaixa na categoria "O quê", que é usada para perguntas sobre a identificação de algo.		t3_1fqnnua
		t3_1fqkv8z	Vc acredita no sobrenatural (religião, Deus, espíritos, etc), ouq isso tudo eh apenas algo manifestado pela mente e não existe?	FALSE			reddit	vc acredita no sobrenatural religiao deus espiritos etc ouq isso tudo eh apenas algo manifestado pela mente e nao existe	vc acredita no sobrenatural religiao deus espiritos etc ouq isso tudo eh apenas algo manifestado pela mente e nao existe	['vc', 'acredita', 'no', 'sobrenatural', 'religiao', 'deus', 'espiritos', 'etc', 'ouq', 'isso', 'tudo', 'eh', 'apenas', 'algo', 'manifestado', 'pela', 'mente', 'e', 'nao', 'existe']	vc acredita no sobrenatural religiao deus espiritos etc ouq isso tudo eh apenas algo manifestado pela mente e nao existe	20	Outro	1	20	A pergunta busca saber a crença pessoal do interlocutor sobre a existência do sobrenatural, religião, Deus e espíritos, comparando isso com uma manifestação da mente. Não se encaixa nas categorias fornecidas, pois não pergunta sobre uma ação específica, nem busca justificativas, responsáveis, locais, tempos, métodos ou custos. É uma questão de opinião pessoal e crença.		t3_1fqkv8z
		t3_1fqut54	Coca Coca de Oreo ou Oreo de Coca Cola?	FALSE			reddit	coca coca de oreo ou oreo de coca cola	coca coca de oreo ou oreo de coca cola	['coca', 'coca', 'de', 'oreo', 'ou', 'oreo', 'de', 'coca', 'cola']	coca coca de oreo ou oreo de coca cola	9	Outro	0.555556	5	A pergunta "Coca Cola de Oreo ou Oreo de Coca Cola?" não se encaixa nas categorias dadas, pois parece ser mais uma escolha ou preferência entre dois produtos hipotéticos ou de conceito inspirados entre a marca de bebida Coca Cola e a marca de biscoitos Oreo. As categorias disponíveis são perguntas objetivas relacionadas a ações, razões, identidades, locais, tempos, métodos, ou custos, enquanto es…		t3_1fqut54
		t3_1fqky84	Se vc pudesse pedir qqr coisa no universo, oq pediria? Considerando q viraria verdade?	FALSE			reddit	se vc pudesse pedir qqr coisa no universo oq pediria considerando q viraria verdade	se vc pudesse pedir qqr coisa no universo oq pediria considerando q viraria verdade	['se', 'vc', 'pudesse', 'pedir', 'qqr', 'coisa', 'no', 'universo', 'oq', 'pediria', 'considerando', 'q', 'viraria', 'verdade']	se vc pudesse pedir qqr coisa no universo oq pediria considerando q viraria verdade	14	O quê	1	14	A pergunta está buscando saber qual coisa, objeto, situação ou ação a pessoa escolheria ou desejaria se pudesse pedir qualquer coisa no universo. Isso se encaixa na categoria "O quê", pois é uma questão sobre a identificação ou escolha de algo específico.		t3_1fqky84
		t3_1fqp39m	Vida urbana ou vida rural?	FALSE			reddit	vida urbana ou vida rural	vida urbana ou vida rural	['vida', 'urbana', 'ou', 'vida', 'rural']	vida urbana ou vida rural	5	Outro	0.8	4	A pergunta "Vida urbana ou vida rural?" não se enquadra em nenhuma das categorias especificadas (O quê, Por quê, Quem, Onde, Quando, Como, Quanto). Não se trata de uma pergunta que busca obter informações específicas sobre ações, justificativas, responsáveis, locais, cronologia, métodos ou custos. É uma questão comparativa ou de preferência entre dois modos de vida distintos (urbano e rural) e po…		t3_1fqp39m
		t3_1fqsux3	Vocês iriam ao almoço de família ou iriam para um torneio (nível baixo) de xadrez?	FALSE			reddit	voces iriam ao almoco de familia ou iriam para um torneio nivel baixo de xadrez	voces iriam ao almoco de familia ou iriam para um torneio nivel baixo de xadrez	['voces', 'iriam', 'ao', 'almoco', 'de', 'familia', 'ou', 'iriam', 'para', 'um', 'torneio', 'nivel', 'baixo', 'de', 'xadrez']	voces iriam ao almoco de familia ou iriam para um torneio nivel baixo de xadrez	15	Outro	0.866667	13	A pergunta apresenta um dilema ou escolha pessoal entre duas opções (um almoço de família ou um torneio de xadrez), sem buscar uma ação específica, justificativa, identificação, local, momento temporal, método ou custo. Assim, não se encaixa claramente em nenhuma das categorias listadas.		t3_1fqsux3
		t3_1fqrk79	Voces tambem acham Pearl Jam superestimado?	FALSE			reddit	voces tambem acham pearl jam superestimado	voces tambem acham pearl jam superestimado	['voces', 'tambem', 'acham', 'pearl', 'jam', 'superestimado']	voces tambem acham pearl jam superestimado	6	Outro	1	6	A pergunta está pedindo a opinião subjetiva do interlocutor sobre a banda Pearl Jam, questionando se eles são considerados superestimados. Não se encaixa em nenhuma das categorias específicas de ação, justificativa, responsabilidade, localização, cronologia, método ou custo.		t3_1fqrk79
		t3_1fqxdpc	Tem alguém com menos de 20 anos nesse app kkkkk?	FALSE			reddit	tem alguem com menos de 20 anos nesse app kkkkk	tem alguem com menos de 20 anos nesse app kkkkk	['tem', 'alguem', 'com', 'menos', 'de', '20', 'anos', 'nesse', 'app', 'kkkkk']	tem alguem com menos de 20 anos nesse app kkkkk	10	Quem	1	10	A pergunta está indagando sobre a identidade das pessoas que têm menos de 20 anos utilizando o aplicativo, logo é uma pergunta focada em quem são essas pessoas. Isso se alinha com a categoria "Quem", que se refere a perguntas sobre quem executou uma ação, quem é responsável ou, neste caso, quem possui uma determinada característica (ter menos de 20 anos).		t3_1fqxdpc
		t3_1fqqsdk	Vocês possuem alguma lembrança da sua infância em que não sabem se realmente aconteceu ou é um sonho/devaneio?	FALSE			reddit	voces possuem alguma lembranca da sua infancia em que nao sabem se realmente aconteceu ou e um sonhodevaneio	voces possuem alguma lembranca da sua infancia em que nao sabem se realmente aconteceu ou e um sonhodevaneio	['voces', 'possuem', 'alguma', 'lembranca', 'da', 'sua', 'infancia', 'em', 'que', 'nao', 'sabem', 'se', 'realmente', 'aconteceu', 'ou', 'e', 'um', 'sonhodevaneio']	voces possuem alguma lembranca da sua infancia em que nao sabem se realmente aconteceu ou e um sonhodevaneio	18	Outro	1	18	A pergunta não se enquadra diretamente em nenhuma das categorias especificadas, pois não está pedindo uma ação, justificativa, identificação de quem, lugar, tempo, método ou custo. A pergunta está mais relacionada a experiências pessoais e lembranças, não se alinhando às categorias definidas.		t3_1fqqsdk
		t3_1fqm5gt	Você frequenta biblioteca pública?	FALSE			reddit	voce frequenta biblioteca publica	voce frequenta biblioteca publica	['voce', 'frequenta', 'biblioteca', 'publica']	voce frequenta biblioteca publica	4	Outro	1	4	A pergunta "Você frequenta biblioteca pública?" não se encaixa claramente em nenhuma das categorias especificadas, pois é uma pergunta direta e pessoal que busca uma resposta de sim ou não sobre o hábito de alguém frequentar bibliotecas públicas. Não está buscando uma ação, justificativa, responsável, localização, tempo, método ou custo.		t3_1fqm5gt
		t3_1fq8yo3	Pq uber acc corrida e e fica piruando pra cancelar?	FALSE			reddit	pq uber acc corrida e e fica piruando pra cancelar	pq uber acc corrida e e fica piruando pra cancelar	['pq', 'uber', 'acc', 'corrida', 'e', 'e', 'fica', 'piruando', 'pra', 'cancelar']	pq uber acc corrida e e fica piruando pra cancelar	10	Por quê	0.9	9	A pergunta busca justificar o comportamento dos motoristas da Uber, querendo saber a razão (ou objetivo) por trás de aceitarem corridas e depois ficarem procurando motivos para cancelar. Portanto, a questão é sobre a motivação ou razão desse comportamento.		t3_1fq8yo3
		t3_1fq9uwe	Existe uma idade mínima ou ideal para aprender sobre política e economia?	FALSE			reddit	existe uma idade minima ou ideal para aprender sobre politica e economia	existe uma idade minima ou ideal para aprender sobre politica e economia	['existe', 'uma', 'idade', 'minima', 'ou', 'ideal', 'para', 'aprender', 'sobre', 'politica', 'e', 'economia']	existe uma idade minima ou ideal para aprender sobre politica e economia	12	Quando	1	12	A pergunta "Existe uma idade mínima ou ideal para aprender sobre política e economia?" busca saber em que momento cronológico é apropriado ou recomendado começar a estudar esses temas. Isso se alinha com questões sobre "quando" uma ação ou evento deve acontecer.		t3_1fq9uwe
		t3_1fqao23	Vc tem medo de algo ou de alguma coisa que o pessoal fala que é besteira ou algo estúpido?	FALSE			reddit	vc tem medo de algo ou de alguma coisa que o pessoal fala que e besteira ou algo estupido	vc tem medo de algo ou de alguma coisa que o pessoal fala que e besteira ou algo estupido	['vc', 'tem', 'medo', 'de', 'algo', 'ou', 'de', 'alguma', 'coisa', 'que', 'o', 'pessoal', 'fala', 'que', 'e', 'besteira', 'ou', 'algo', 'estupido']	vc tem medo de algo ou de alguma coisa que o pessoal fala que e besteira ou algo estupido	19	O quê	0.789474	15	A pergunta busca identificar se a pessoa tem medo de algo específico. Está focada na identificação de um objeto ou coisa pela qual a pessoa sente medo, sem buscar justificativas, responsáveis, locais, métodos, ou valores associados a esse medo.		t3_1fqao23
		t3_1fqh8k3	Seu trabalho envolve computador?	FALSE			reddit	seu trabalho envolve computador	seu trabalho envolve computador	['seu', 'trabalho', 'envolve', 'computador']	seu trabalho envolve computador	4	Outro	1	4	A pergunta "Seu trabalho envolve computador?" não se enquadra em nenhuma das categorias fornecidas. Ela é uma pergunta direta pedindo uma confirmação ou negação sobre o uso de computador no trabalho de uma pessoa, mas não busca saber a execução de uma ação (O quê), justificativas ou motivações (Por quê), responsáveis por ações (Quem), localização (Onde), tempo (Quando), métodos ou estados (Como),…		t3_1fqh8k3
		t3_1fpnpj7	É normal não ter amigos?	FALSE			reddit	e normal nao ter amigos	e normal nao ter amigos	['e', 'normal', 'nao', 'ter', 'amigos']	e normal nao ter amigos	5	Outro	1	5	A pergunta "É normal não ter amigos?" não se encaixa diretamente em nenhuma das categorias predefinidas, pois não busca uma ação, justificativa, responsabilidade, localização, momento cronológico, método ou medida de custo. Em vez disso, é uma questão sobre normalidade social ou status pessoal que não se alinha claramente com as categorias listadas.		t3_1fpnpj7
		t3_1fq0owk	A incidência do autismo está aumentando ou são os diagnósticos que estão aumentando, conduzindo a essa impressão?	FALSE			reddit	a incidencia do autismo esta aumentando ou sao os diagnosticos que estao aumentando conduzindo a essa impressao	a incidencia do autismo esta aumentando ou sao os diagnosticos que estao aumentando conduzindo a essa impressao	['a', 'incidencia', 'do', 'autismo', 'esta', 'aumentando', 'ou', 'sao', 'os', 'diagnosticos', 'que', 'estao', 'aumentando', 'conduzindo', 'a', 'essa', 'impressao']	a incidencia do autismo esta aumentando ou sao os diagnosticos que estao aumentando conduzindo a essa impressao	17	Por quê	0.882353	15	A pergunta busca uma justificativa ou motivação para a impressão de que a incidência do autismo está aumentando. Está questionando se o aumento é real ou aparente devido ao aumento nos diagnósticos.		t3_1fq0owk
		t3_1fpxz6y	Porque todo mundo não vai atrás do Pomo de ouro no Quadribol?	FALSE			reddit	porque todo mundo nao vai atras do pomo de ouro no quadribol	porque todo mundo nao vai atras do pomo de ouro no quadribol	['porque', 'todo', 'mundo', 'nao', 'vai', 'atras', 'do', 'pomo', 'de', 'ouro', 'no', 'quadribol']	porque todo mundo nao vai atras do pomo de ouro no quadribol	12	Por quê	1	12	A pergunta busca uma justificativa ou razão para a ação de todos não irem atrás do Pomo de ouro no Quadribol. Ela está pedindo a motivação por trás de uma estratégia ou decisão no jogo.		t3_1fpxz6y
		t3_1fpxtq3	Preciso comprar uma cama e colchão. Melhor comprar em loja de colchão ou de departamento/móveis?	FALSE			reddit	preciso comprar uma cama e colchao melhor comprar em loja de colchao ou de departamentomoveis	preciso comprar uma cama e colchao melhor comprar em loja de colchao ou de departamentomoveis	['preciso', 'comprar', 'uma', 'cama', 'e', 'colchao', 'melhor', 'comprar', 'em', 'loja', 'de', 'colchao', 'ou', 'de', 'departamentomoveis']	preciso comprar uma cama e colchao melhor comprar em loja de colchao ou de departamentomoveis	15	Onde	0.8	12	A pergunta está buscando uma indicação de lugar mais adequado para realizar a compra (loja de colchão ou loja de departamento/móveis), o que se alinha com a categoria "Onde", pois se refere a pedidos de indicação sobre lugares com fins específicos.		t3_1fpxtq3
		t3_1fptlqq	Pra console ps5/seriesX com foco em mundo aberto e campanha, seria melhor um monitor 4k 60hz ou resolução menor e mais hz?	FALSE			reddit	pra console ps5seriesx com foco em mundo aberto e campanha seria melhor um monitor 4k 60hz ou resolucao menor e mais hz	pra console ps5seriesx com foco em mundo aberto e campanha seria melhor um monitor 4k 60hz ou resolucao menor e mais hz	['pra', 'console', 'ps5seriesx', 'com', 'foco', 'em', 'mundo', 'aberto', 'e', 'campanha', 'seria', 'melhor', 'um', 'monitor', '4k', '60hz', 'ou', 'resolucao', 'menor', 'e', 'mais', 'hz']	pra console ps5seriesx com foco em mundo aberto e campanha seria melhor um monitor 4k 60hz ou resolucao menor e mais hz	22	O quê	0.954545	21	A pergunta busca identificar qual opção de monitor seria melhor para uso em console PS5/SeriesX focado em mundo aberto e campanha. Trata-se de uma escolha ou recomendação específica para uma situação, e não de como fazer algo, justificativa ou local, entre outros.		t3_1fptlqq
		t3_1fq1hlo	Que tipo de VPN exatamente que não pode usar ou então, multa de 50 mil?	FALSE			reddit	que tipo de vpn exatamente que nao pode usar ou entao multa de 50 mil	que tipo de vpn exatamente que nao pode usar ou entao multa de 50 mil	['que', 'tipo', 'de', 'vpn', 'exatamente', 'que', 'nao', 'pode', 'usar', 'ou', 'entao', 'multa', 'de', '50', 'mil']	que tipo de vpn exatamente que nao pode usar ou entao multa de 50 mil	15	O quê	0.866667	13	A pergunta busca a identificação de um tipo específico de VPN que, se usado, resultaria em uma multa de 50 mil. Ela está questionando qual é a ação ou ferramenta que não deve ser utilizada, portanto, encaixa-se na categoria "O quê".		t3_1fq1hlo
		t3_1fppmth	Você possui pessoas dependentes de você ou você é sozinho(a)?	FALSE			reddit	voce possui pessoas dependentes de voce ou voce e sozinhoa	voce possui pessoas dependentes de voce ou voce e sozinhoa	['voce', 'possui', 'pessoas', 'dependentes', 'de', 'voce', 'ou', 'voce', 'e', 'sozinhoa']	voce possui pessoas dependentes de voce ou voce e sozinhoa	10	Outro	0.8	8	A pergunta "Você possui pessoas dependentes de você ou você é sozinho(a)?" não se encaixa claramente em nenhuma das categorias fornecidas. Ela não busca saber uma ação, justificativa, responsável, local, tempo, método, ou custo. Em vez disso, é uma pergunta sobre a situação pessoal de alguém em relação à dependência de outras pessoas. Portanto, ela não se enquadra nas categorias propostas e é cla…		t3_1fppmth
		t3_1fppdek	Gato macho faz xixi igual cachorro macho?	FALSE			reddit	gato macho faz xixi igual cachorro macho	gato macho faz xixi igual cachorro macho	['gato', 'macho', 'faz', 'xixi', 'igual', 'cachorro', 'macho']	gato macho faz xixi igual cachorro macho	7	Como	0.857143	6	A pergunta "Gato macho faz xixi igual cachorro macho?" está perguntando sobre o modo como ou a maneira pela qual gatos machos urinam comparado a cachorros machos. Portanto, está relacionada a um método ou forma de execução de uma ação, sendo assim classificada como "Como".		t3_1fppdek
		t3_1fpnc78	Já instalou por fora o Windows 11 24H2?	FALSE			reddit	ja instalou por fora o windows 11 24h2	ja instalou por fora o windows 11 24h2	['ja', 'instalou', 'por', 'fora', 'o', 'windows', '11', '24h2']	ja instalou por fora o windows 11 24h2	8	O quê	1	8	A pergunta está questionando sobre a ação de instalar o Windows 11 24H2 por fora, ou seja, busca saber se foi realizado esse procedimento específico de instalação, o que se encaixa na categoria de identificação de uma ação ou objeto.		t3_1fpnc78
		t3_1fpfg2u	A empatia é realmente altruísta?	FALSE			reddit	a empatia e realmente altruista	a empatia e realmente altruista	['a', 'empatia', 'e', 'realmente', 'altruista']	a empatia e realmente altruista	5	Outro	1	5	A pergunta "A empatia é realmente altruísta?" não se enquadra adequadamente em nenhuma das categorias apresentadas. Ela está explorando a natureza da empatia em relação ao conceito de altruísmo, mas não está pedindo uma definição, justificativa, identificação, localização, tempo, método ou custo específico que corresponde às categorias de O quê, Por quê, Quem, Onde, Quando, Como ou Quanto. Portan…		t3_1fpfg2u
		t3_1fpifgg	Pra vocês que querem focar no trabalho, estudo ou um objetivo de vida ou social, ter um relacionamento amoroso é um problema durante esse período?	FALSE			reddit	pra voces que querem focar no trabalho estudo ou um objetivo de vida ou social ter um relacionamento amoroso e um problema durante esse periodo	pra voces que querem focar no trabalho estudo ou um objetivo de vida ou social ter um relacionamento amoroso e um problema durante esse periodo	['pra', 'voces', 'que', 'querem', 'focar', 'no', 'trabalho', 'estudo', 'ou', 'um', 'objetivo', 'de', 'vida', 'ou', 'social', 'ter', 'um', 'relacionamento', 'amoroso', 'e', 'um', 'problema', 'durante', 'esse', 'periodo']	pra voces que querem focar no trabalho estudo ou um objetivo de vida ou social ter um relacionamento amoroso e um problema durante esse periodo	25	Outro	0.88	22	A pergunta apresenta uma reflexão pessoal e subjetiva sobre se um relacionamento amoroso pode ser considerado um problema durante um período focado em trabalho, estudo ou um objetivo de vida ou social. Não se encaixa claramente nas categorias listadas, pois não está em busca de uma resposta que forneça ação, justificação, identificação de responsável, localização, cronologia, método ou custo. Em …		t3_1fpifgg
		t3_1fpjub1	Sou feia oque faço pra autoestima subir?	FALSE			reddit	sou feia oque faco pra autoestima subir	sou feia oque faco pra autoestima subir	['sou', 'feia', 'oque', 'faco', 'pra', 'autoestima', 'subir']	sou feia oque faco pra autoestima subir	7	Como	1	7	A pergunta busca saber métodos ou maneiras de elevar a autoestima, que é um processo ou estado emocional. Portanto, está buscando saber como alcançar esse objetivo, o que se enquadra na categoria "Como".		t3_1fpjub1
		t3_1fpf5co	Pq sentimos vontade de soltar um barro depois que fumamos ?	FALSE			reddit	pq sentimos vontade de soltar um barro depois que fumamos	pq sentimos vontade de soltar um barro depois que fumamos	['pq', 'sentimos', 'vontade', 'de', 'soltar', 'um', 'barro', 'depois', 'que', 'fumamos']	pq sentimos vontade de soltar um barro depois que fumamos	10	Por quê	1	10	A pergunta busca uma justificativa ou explicação para a sensação de vontade de "soltar um barro" (ir ao banheiro) após fumar. Está buscando entender a razão ou o motivo pelo qual essa reação ocorre no corpo humano. Portanto, se encaixa na categoria "Por quê", que é destinada a perguntas que buscam justificativas ou motivações para algo acontecer.		t3_1fpf5co
		t3_1fp9bw0	conhecem algum simulador virtual para aprender a dirigir gratuitamente?	FALSE			reddit	conhecem algum simulador virtual para aprender a dirigir gratuitamente	conhecem algum simulador virtual para aprender a dirigir gratuitamente	['conhecem', 'algum', 'simulador', 'virtual', 'para', 'aprender', 'a', 'dirigir', 'gratuitamente']	conhecem algum simulador virtual para aprender a dirigir gratuitamente	9	Onde	1	9	A pergunta está pedindo uma recomendação de onde encontrar um simulador virtual para aprender a dirigir de forma gratuita. Isso se alinha com a categoria "Onde", pois está buscando uma indicação de lugar ou plataforma que ofereça o serviço mencionado.		t3_1fp9bw0
		t3_1fp9nnk	Oque você esta tentando provar ?	FALSE			reddit	oque voce esta tentando provar	oque voce esta tentando provar	['oque', 'voce', 'esta', 'tentando', 'provar']	oque voce esta tentando provar	5	O quê	1	5	A pergunta "O que você está tentando provar?" busca identificar a ação ou objetivo que a pessoa está visando alcançar ou demonstrar. Portanto, a questão se refere a identificação de algo.		t3_1fp9nnk
		t3_1fp65p0	Alguem ai já aprendeu s tocar cavaquinho sozinho, sem auxílio de outra pessoa ou professor ?	FALSE			reddit	alguem ai ja aprendeu s tocar cavaquinho sozinho sem auxilio de outra pessoa ou professor	alguem ai ja aprendeu s tocar cavaquinho sozinho sem auxilio de outra pessoa ou professor	['alguem', 'ai', 'ja', 'aprendeu', 's', 'tocar', 'cavaquinho', 'sozinho', 'sem', 'auxilio', 'de', 'outra', 'pessoa', 'ou', 'professor']	alguem ai ja aprendeu s tocar cavaquinho sozinho sem auxilio de outra pessoa ou professor	15	Quem	1	15	A pergunta está buscando identificar a presença de pessoas que tenham aprendido a tocar cavaquinho sozinhas, sem auxílio de professores ou outras pessoas. Apesar de não ser uma pergunta típica de "quem", ela busca saber sobre o grupo de pessoas que têm essa habilidade autodidata. Assim, está relacionada ao "quem" no sentido de identificar um grupo com uma habilidade específica.		t3_1fp65p0
		t3_1fp4gfs	Você costuma atender ligações desconhecidas?	FALSE			reddit	voce costuma atender ligacoes desconhecidas	voce costuma atender ligacoes desconhecidas	['voce', 'costuma', 'atender', 'ligacoes', 'desconhecidas']	voce costuma atender ligacoes desconhecidas	5	Outro	1	5	A pergunta "Você costuma atender ligações desconhecidas?" está solicitando uma informação sobre o comportamento pessoal do interlocutor, mas não se encaixa diretamente em nenhuma das categorias listadas, como "O quê", "Por quê", "Quem", "Onde", "Quando", "Como" ou "Quanto". Não busca uma identificação de ação, justificação, cronologia, método, localização ou quantificação claramente classificávei…		t3_1fp4gfs
		t3_1fp4xdu	Que hábito melhorou tanto seu dia-a-dia que você gostaria de ter começado antes?	FALSE			reddit	que habito melhorou tanto seu diaadia que voce gostaria de ter comecado antes	que habito melhorou tanto seu diaadia que voce gostaria de ter comecado antes	['que', 'habito', 'melhorou', 'tanto', 'seu', 'diaadia', 'que', 'voce', 'gostaria', 'de', 'ter', 'comecado', 'antes']	que habito melhorou tanto seu diaadia que voce gostaria de ter comecado antes	13	O quê	0.923077	12	A pergunta busca identificar um hábito específico que teve um impacto positivo no dia-a-dia da pessoa, ou seja, está pedindo para nomear ou identificar uma ação que foi benéfica. Isso se encaixa na categoria "O quê", pois trata de identificar algo (neste caso, um hábito) que melhorou a rotina.		t3_1fp4xdu
		t3_1fp0g09	Pensam em sai do brasil, visitar países ?	FALSE			reddit	pensam em sai do brasil visitar paises	pensam em sai do brasil visitar paises	['pensam', 'em', 'sai', 'do', 'brasil', 'visitar', 'paises']	pensam em sai do brasil visitar paises	7	Outro	1	7	A pergunta "Pensam em sair do Brasil, visitar países?" é uma pergunta pessoal e geral, que pode estar relacionada a múltiplos aspectos (planos de viagem, desejos pessoais, etc.) que não se encaixam claramente em nenhuma das categorias específicas como ação, justificativa, pessoa, lugar específico, tempo, método ou custo. É uma pergunta aberta sobre intenções ou desejos, e não aborda um aspecto es…		t3_1fp0g09
		t3_1fouf94	Para os solteiros. Vcs transam quantas vezes no mes? Com pessoas diferentes ou sempre a mesma?	FALSE			reddit	para os solteiros vcs transam quantas vezes no mes com pessoas diferentes ou sempre a mesma	para os solteiros vcs transam quantas vezes no mes com pessoas diferentes ou sempre a mesma	['para', 'os', 'solteiros', 'vcs', 'transam', 'quantas', 'vezes', 'no', 'mes', 'com', 'pessoas', 'diferentes', 'ou', 'sempre', 'a', 'mesma']	para os solteiros vcs transam quantas vezes no mes com pessoas diferentes ou sempre a mesma	16	Quanto	1	16	A pergunta "Vcs transam quantas vezes no mes?" envolve saber a frequência, ou número, de vezes que uma ação é realizada em um determinado período de tempo, neste caso, durante um mês. Isso está diretamente relacionado à categoria "Quanto", que trata da quantidade ou frequência. A segunda parte da pergunta "Com pessoas diferentes ou sempre a mesma?" não altera a classificação principal.		t3_1fouf94
		t3_1for80k	Você é uma pessoa falante ou mais calada?	FALSE			reddit	voce e uma pessoa falante ou mais calada	voce e uma pessoa falante ou mais calada	['voce', 'e', 'uma', 'pessoa', 'falante', 'ou', 'mais', 'calada']	voce e uma pessoa falante ou mais calada	8	Outro	1	8	A pergunta é sobre uma característica pessoal ou traço de personalidade (ser falante ou calado), que não se encaixa diretamente em nenhuma das categorias fornecidas. As categorias são voltadas para buscas de informações específicas relacionadas a ações, justificativas, responsáveis, locais, tempos, métodos ou custos, e esta pergunta não se alinha claramente com nenhuma delas.		t3_1for80k
		t3_1fp4skq	Falando sério, o quão eficiente é a estratégia de se fazer de bobo/surpreso/perdido numa discussão?	FALSE			reddit	falando serio o quao eficiente e a estrategia de se fazer de bobosurpresoperdido numa discussao	falando serio o quao eficiente e a estrategia de se fazer de bobosurpresoperdido numa discussao	['falando', 'serio', 'o', 'quao', 'eficiente', 'e', 'a', 'estrategia', 'de', 'se', 'fazer', 'de', 'bobosurpresoperdido', 'numa', 'discussao']	falando serio o quao eficiente e a estrategia de se fazer de bobosurpresoperdido numa discussao	15	Como	0.933333	14	A pergunta busca compreender a eficiência de uma estratégia, ou seja, como essa estratégia se comporta ou funciona em uma discussão. Está indagando sobre o método e a eficácia de se adotar um determinado comportamento em debates, que se alinha com a categoria "Como", relacionada a métodos e modos de execução.		t3_1fp4skq
		t3_1fp3mh2	"Trabalhando" com internet. Alguém que faz conteúdo dark há algum tempo já, poderia informar se isso da certo?	FALSE			reddit	trabalhando com internet alguem que faz conteudo dark ha algum tempo ja poderia informar se isso da certo	trabalhando com internet alguem que faz conteudo dark ha algum tempo ja poderia informar se isso da certo	['trabalhando', 'com', 'internet', 'alguem', 'que', 'faz', 'conteudo', 'dark', 'ha', 'algum', 'tempo', 'ja', 'poderia', 'informar', 'se', 'isso', 'da', 'certo']	trabalhando com internet alguem que faz conteudo dark ha algum tempo ja poderia informar se isso da certo	18	Como	1	18	A pergunta está pedindo informações sobre a eficácia de trabalhar com conteúdo dark na internet, sugerindo um interesse em entender o método ou o estado atual disso na prática. Isso se caracteriza por querer saber "como" esse tipo de trabalho funciona ou se é bem-sucedido.		t3_1fp3mh2
		t3_1fp2el3	Da para fazer lives por aqui?	FALSE			reddit	da para fazer lives por aqui	da para fazer lives por aqui	['da', 'para', 'fazer', 'lives', 'por', 'aqui']	da para fazer lives por aqui	6	O quê	1	6	A pergunta "Da para fazer lives por aqui?" está buscando identificar se é possível realizar uma ação específica (fazer lives) em um determinado local ou plataforma. Isso se encaixa na categoria "O quê", que refere-se a ações a serem executadas ou problemas a serem solucionados.		t3_1fp2el3
		t3_1forzf3	Vocês tem uma rotina ou acham que torna a vida muito robótica ???	FALSE			reddit	voces tem uma rotina ou acham que torna a vida muito robotica	voces tem uma rotina ou acham que torna a vida muito robotica	['voces', 'tem', 'uma', 'rotina', 'ou', 'acham', 'que', 'torna', 'a', 'vida', 'muito', 'robotica']	voces tem uma rotina ou acham que torna a vida muito robotica	12	O quê	1	12	A pergunta indaga sobre a existência de uma ação específica, que é ter ou não uma rotina. Trata-se de uma identificação do que as pessoas organizam ou estruturam em suas vidas diárias (ou seja, se elas têm uma rotina). Além disso, ela busca saber a opinião sobre o efeito dessa ação (ter uma rotina) em tornar a vida muito robótica, mas a parte central da pergunta ainda é identificar se há essa rot…		t3_1forzf3
		t3_1foulrf	É burrice querer ser mãe em tempo integral nos dias de hoje?	FALSE			reddit	e burrice querer ser mae em tempo integral nos dias de hoje	e burrice querer ser mae em tempo integral nos dias de hoje	['e', 'burrice', 'querer', 'ser', 'mae', 'em', 'tempo', 'integral', 'nos', 'dias', 'de', 'hoje']	e burrice querer ser mae em tempo integral nos dias de hoje	12	Outro	1	12	A pergunta busca uma opinião ou julgamento subjetivo sobre uma decisão de vida, e não se enquadra claramente em nenhuma das categorias oferecidas, que são baseadas em informações objetivas ou factuais. As categorias são voltadas para ações, justificativas, responsáveis, localizações, tempos, métodos ou custos, o que não se aplica à natureza subjetiva e julgadora da pergunta apresentada.		t3_1foulrf
		t3_1foqfy8	Já contratou um detetive particular?	FALSE			reddit	ja contratou um detetive particular	ja contratou um detetive particular	['ja', 'contratou', 'um', 'detetive', 'particular']	ja contratou um detetive particular	5	Outro	1	5	A pergunta "Já contratou um detetive particular?" não se enquadra em nenhuma das categorias específicas listadas. Ela é uma pergunta direta e pessoal sobre a experiência do interlocutor em relação a contratar ou não um detetive particular, não buscando uma ação, justificativa, pessoa responsável, lugar, momento, método ou quantificação. Portanto, ela não se encaixa em nenhuma das categorias defin…		t3_1foqfy8
		t3_1fobyks	Com que frequência você usa o Chatgpt?	FALSE			reddit	com que frequencia voce usa o chatgpt	com que frequencia voce usa o chatgpt	['com', 'que', 'frequencia', 'voce', 'usa', 'o', 'chatgpt']	com que frequencia voce usa o chatgpt	7	Quanto	1	7	A pergunta busca saber a frequência de uso, o que se refere ao custo de tempo. Então, relaciona-se à medida de tempo, frequência ou quantidade, encaixando-se assim na categoria "Quanto".		t3_1fobyks
		t3_1fov3wg	Anúncios Youtube entre outros lugares, vcs já chegaram a ser influenciados a comprar algo por conta desses anúncios ?	FALSE			reddit	anuncios youtube entre outros lugares vcs ja chegaram a ser influenciados a comprar algo por conta desses anuncios	anuncios youtube entre outros lugares vcs ja chegaram a ser influenciados a comprar algo por conta desses anuncios	['anuncios', 'youtube', 'entre', 'outros', 'lugares', 'vcs', 'ja', 'chegaram', 'a', 'ser', 'influenciados', 'a', 'comprar', 'algo', 'por', 'conta', 'desses', 'anuncios']	anuncios youtube entre outros lugares vcs ja chegaram a ser influenciados a comprar algo por conta desses anuncios	18	O quê	0.888889	16	A pergunta busca identificar se a ação de compra foi realizada por influência de anúncios em plataformas como o YouTube. Nesse contexto, ela se enquadra na categoria "O quê" porque está investigando especificamente se ocorreu a ação de compra devido aos anúncios.		t3_1fov3wg
		t3_1fotxyy	vcs já deram fora em uma pessoa e dps se arrependeram amargamente pq dps de um tempo ele/ela apareceu bonito/a ?	FALSE			reddit	vcs ja deram fora em uma pessoa e dps se arrependeram amargamente pq dps de um tempo eleela apareceu bonitoa	vcs ja deram fora em uma pessoa e dps se arrependeram amargamente pq dps de um tempo eleela apareceu bonitoa	['vcs', 'ja', 'deram', 'fora', 'em', 'uma', 'pessoa', 'e', 'dps', 'se', 'arrependeram', 'amargamente', 'pq', 'dps', 'de', 'um', 'tempo', 'eleela', 'apareceu', 'bonitoa']	vcs ja deram fora em uma pessoa e dps se arrependeram amargamente pq dps de um tempo eleela apareceu bonitoa	20	Outro	0.95	19	A pergunta não se encaixa claramente em nenhuma das categorias definidas. Ela é mais uma questão reflexiva ou uma curiosidade sobre experiências pessoais de rejeição e arrependimento, não solicitando uma ação específica, justificativa, identificação, lugar, tempo, método ou custo.		t3_1fotxyy
		t3_1foc1rl	Você ainda usa relógio de pulso hoje em dia ou só vê as horas no celular ou outros aparelhos eletrônicos?	FALSE			reddit	voce ainda usa relogio de pulso hoje em dia ou so ve as horas no celular ou outros aparelhos eletronicos	voce ainda usa relogio de pulso hoje em dia ou so ve as horas no celular ou outros aparelhos eletronicos	['voce', 'ainda', 'usa', 'relogio', 'de', 'pulso', 'hoje', 'em', 'dia', 'ou', 'so', 've', 'as', 'horas', 'no', 'celular', 'ou', 'outros', 'aparelhos', 'eletronicos']	voce ainda usa relogio de pulso hoje em dia ou so ve as horas no celular ou outros aparelhos eletronicos	20	Outro	0.95	19	A pergunta "Você ainda usa relógio de pulso hoje em dia ou só vê as horas no celular ou outros aparelhos eletrônicos?" não se ajusta bem a nenhuma das categorias específicas fornecidas. Ela está mais relacionada a um inquérito pessoal ou preferência individual sobre o uso de diferentes dispositivos para verificar o tempo, sem buscar uma ação, razão, pessoa, lugar, tempo, método ou recurso específ…		t3_1foc1rl
		t3_1foocu1	Você possui uma "mini farmácia" em sua casa?	FALSE			reddit	voce possui uma mini farmacia em sua casa	voce possui uma mini farmacia em sua casa	['voce', 'possui', 'uma', 'mini', 'farmacia', 'em', 'sua', 'casa']	voce possui uma mini farmacia em sua casa	8	Outro	1	8	A pergunta "Você possui uma 'mini farmácia' em sua casa?" não se enquadra claramente em nenhuma das categorias fornecidas. Ela é uma pergunta de sim ou não e não busca informações sobre ações, justificativas, pessoas, locais, tempos, métodos ou custos. Portanto, ela é classificada como "Outro".		t3_1foocu1
		t3_1foe2cg	Sua assinature é chique ou é simplesmente seu nome e sobrenome da forma que você escreve normalmente?	FALSE			reddit	sua assinature e chique ou e simplesmente seu nome e sobrenome da forma que voce escreve normalmente	sua assinature e chique ou e simplesmente seu nome e sobrenome da forma que voce escreve normalmente	['sua', 'assinature', 'e', 'chique', 'ou', 'e', 'simplesmente', 'seu', 'nome', 'e', 'sobrenome', 'da', 'forma', 'que', 'voce', 'escreve', 'normalmente']	sua assinature e chique ou e simplesmente seu nome e sobrenome da forma que voce escreve normalmente	17	Outro	0.882353	15	A pergunta não encaixa em nenhuma das categorias predefinidas. Está mais relacionada a uma curiosidade pessoal ou preferência, e não busca uma ação, justificativa, responsabilidade, localização, tempo, método ou custo.		t3_1foe2cg
		t3_1fonp1y	Alguém tem indicação de comunidade que ajude em tomada de escolhas por votação, com opções do OP anexar imagem ao post?	FALSE			reddit	alguem tem indicacao de comunidade que ajude em tomada de escolhas por votacao com opcoes do op anexar imagem ao post	alguem tem indicacao de comunidade que ajude em tomada de escolhas por votacao com opcoes do op anexar imagem ao post	['alguem', 'tem', 'indicacao', 'de', 'comunidade', 'que', 'ajude', 'em', 'tomada', 'de', 'escolhas', 'por', 'votacao', 'com', 'opcoes', 'do', 'op', 'anexar', 'imagem', 'ao', 'post']	alguem tem indicacao de comunidade que ajude em tomada de escolhas por votacao com opcoes do op anexar imagem ao post	21	Onde	0.952381	20	A pergunta solicita uma indicação de comunidade, que se refere a um lugar, seja físico ou virtual, onde o usuário pode buscar apoio para tomada de decisões por votação, preenchendo o critério de "Onde".		t3_1fonp1y
		t3_1forweq	Bonés para bonitos para adolescente?	FALSE			reddit	bones para bonitos para adolescente	bones para bonitos para adolescente	['bones', 'para', 'bonitos', 'para', 'adolescente']	bones para bonitos para adolescente	5	Outro	0.8	4	A pergunta "Bonés para bonitos para adolescente?" não está formulada como uma pergunta completa, portanto não é possível classificá-la em nenhuma das categorias definidas, como O quê, Por quê, Quem, Onde, Quando, Como ou Quanto. A questão parece estar incompleta ou mal formulada, faltando um elemento interrogativo claro.		t3_1forweq
		t3_1fol45a	Vocês costumam ter a sensação de déjà vu com frequência?	FALSE			reddit	voces costumam ter a sensacao de deja vu com frequencia	voces costumam ter a sensacao de deja vu com frequencia	['voces', 'costumam', 'ter', 'a', 'sensacao', 'de', 'deja', 'vu', 'com', 'frequencia']	voces costumam ter a sensacao de deja vu com frequencia	10	Outro	1	10	A pergunta está indagando sobre uma experiência pessoal ou sensação subjetiva, que não se enquadra diretamente em nenhuma das categorias fornecidas. Ela não está buscando uma ação, justificativa, responsável, localização, cronologia, método ou medida quantificável. Portanto, é mais uma consulta sobre uma experiência pessoal, sem um pedido para informação adicional explicativa.		t3_1fol45a
		t3_1foco7v	Há algum subreddit em que posso falar com pessoas de forma totalmente formal?	FALSE			reddit	ha algum subreddit em que posso falar com pessoas de forma totalmente formal	ha algum subreddit em que posso falar com pessoas de forma totalmente formal	['ha', 'algum', 'subreddit', 'em', 'que', 'posso', 'falar', 'com', 'pessoas', 'de', 'forma', 'totalmente', 'formal']	ha algum subreddit em que posso falar com pessoas de forma totalmente formal	13	Onde	1	13	A pergunta busca identificar um subreddit específico ou local onde o usuário pode interagir com outras pessoas de maneira formal. Assim, ela se enquadra na categoria "Onde", pois refere-se à busca por um local específico para realizar uma ação desejada.		t3_1foco7v
		t3_1fokp2k	Com o passar da idade, vocês preferem ir a festas durante a tarde ou ainda continuam a preferir ir à noite?	FALSE			reddit	com o passar da idade voces preferem ir a festas durante a tarde ou ainda continuam a preferir ir a noite	com o passar da idade voces preferem ir a festas durante a tarde ou ainda continuam a preferir ir a noite	['com', 'o', 'passar', 'da', 'idade', 'voces', 'preferem', 'ir', 'a', 'festas', 'durante', 'a', 'tarde', 'ou', 'ainda', 'continuam', 'a', 'preferir', 'ir', 'a', 'noite']	com o passar da idade voces preferem ir a festas durante a tarde ou ainda continuam a preferir ir a noite	21	Outro	0.809524	17	A pergunta aborda uma preferência pessoal relacionada às preferências de atividades sociais em diferentes períodos do dia e como elas podem mudar com a idade. Não se enquadra especificamente em nenhuma das categorias claramente definidas, pois não está pedindo identificação de ação (O quê), justificativa (Por quê), responsável (Quem), localização (Onde), cronologia (Quando), método (Como), ou cus…		t3_1fokp2k
		t3_1focu8q	Há algum subreddit de notícias aqui do Brasil?	FALSE			reddit	ha algum subreddit de noticias aqui do brasil	ha algum subreddit de noticias aqui do brasil	['ha', 'algum', 'subreddit', 'de', 'noticias', 'aqui', 'do', 'brasil']	ha algum subreddit de noticias aqui do brasil	8	Onde	1	8	A pergunta busca saber sobre a existência ou localização de espaços específicos (neste caso, subreddits) onde possam ser encontradas notícias relacionadas ao Brasil. Isso se encaixa na categoria "Onde", pois está relacionada à busca por um lugar ou espaço específico (subreddit) no contexto das notícias brasileiras.		t3_1focu8q
		t3_1fo00ub	Ar Condicionado portátil, aqueles de chão. Compensa?	FALSE			reddit	ar condicionado portatil aqueles de chao compensa	ar condicionado portatil aqueles de chao compensa	['ar', 'condicionado', 'portatil', 'aqueles', 'de', 'chao', 'compensa']	ar condicionado portatil aqueles de chao compensa	7	Por quê	1	7	A pergunta busca uma justificativa ou motivação sobre a viabilidade de possuir um ar condicionado portátil (aqueles de chão), ou seja, se compensa ter um, o que implica em razões favoráveis ou desfavoráveis para tal aquisição. Dessa forma, encaixa-se na categoria "Por quê".		t3_1fo00ub
		t3_1fnvfnc	Você recebe uma proposta para divulgar bets por três meses pelo valor de R$150 mil. Aceita ou recusa?	FALSE			reddit	voce recebe uma proposta para divulgar bets por tres meses pelo valor de r$150 mil aceita ou recusa	voce recebe uma proposta para divulgar bets por tres meses pelo valor de r$150 mil aceita ou recusa	['voce', 'recebe', 'uma', 'proposta', 'para', 'divulgar', 'bets', 'por', 'tres', 'meses', 'pelo', 'valor', 'de', 'r$', '150', 'mil', 'aceita', 'ou', 'recusa']	voce recebe uma proposta para divulgar bets por tres meses pelo valor de r$ 150 mil aceita ou recusa	19	Outro	1	19	A pergunta apresentada não se encaixa nas categorias fornecidas. Trata-se de uma pergunta hipotética e subjetiva sobre a aceitação de uma oferta, o que requer reflexão sobre preferências pessoais e circunstâncias individuais, não sendo especificamente um questionamento sobre ação, motivos, pessoas, locais, tempos, métodos ou custos.		t3_1fnvfnc
		t3_1fod19y	Sobre smartwatch. Já tive dois da xiaomi, que estragarem. Vale a pena comprar um de "marca" para durar mais tempo? Vocês indicam algum?	FALSE			reddit	sobre smartwatch ja tive dois da xiaomi que estragarem vale a pena comprar um de marca para durar mais tempo voces indicam algum	sobre smartwatch ja tive dois da xiaomi que estragarem vale a pena comprar um de marca para durar mais tempo voces indicam algum	['sobre', 'smartwatch', 'ja', 'tive', 'dois', 'da', 'xiaomi', 'que', 'estragarem', 'vale', 'a', 'pena', 'comprar', 'um', 'de', 'marca', 'para', 'durar', 'mais', 'tempo', 'voces', 'indicam', 'algum']	sobre smartwatch ja tive dois da xiaomi que estragarem vale a pena comprar um de marca para durar mais tempo voces indicam algum	23	O quê	1	23	A pergunta busca indicações (ou recomendações) de smartwatches, o que se encaixa na categoria "O quê", pois está relacionada à identificação ou recomendação de um objeto ou produto específico a ser comprado.		t3_1fod19y
		t3_1foah6n	Me ajudem a escolher um tema para uma apresentação livre de 4-5 minutos (para finalização do curso de oratória)?	FALSE			reddit	me ajudem a escolher um tema para uma apresentacao livre de 45 minutos para finalizacao do curso de oratoria	me ajudem a escolher um tema para uma apresentacao livre de 45 minutos para finalizacao do curso de oratoria	['me', 'ajudem', 'a', 'escolher', 'um', 'tema', 'para', 'uma', 'apresentacao', 'livre', 'de', '45', 'minutos', 'para', 'finalizacao', 'do', 'curso', 'de', 'oratoria']	me ajudem a escolher um tema para uma apresentacao livre de 45 minutos para finalizacao do curso de oratoria	19	O quê	0.894737	17	A pergunta solicita ajuda para escolher um tema, ou seja, busca uma identificação de algum tópico ou assunto específico para uma apresentação. Isto se enquadra na categoria "O quê", pois está relacionada a uma ação a ser definida, que é a escolha do tema.		t3_1foah6n
		t3_1fnp0bs	coisas em que o cheiro é melhor que o gosto?	FALSE			reddit	coisas em que o cheiro e melhor que o gosto	coisas em que o cheiro e melhor que o gosto	['coisas', 'em', 'que', 'o', 'cheiro', 'e', 'melhor', 'que', 'o', 'gosto']	coisas em que o cheiro e melhor que o gosto	10	O quê	0.8	8	A pergunta está buscando identificar ações ou objetos específicos, neste caso, alimentos ou substâncias em que o cheiro é melhor do que o gosto. Portanto, ela se encaixa na categoria "O quê" porque quer saber quais são essas coisas.		t3_1fnp0bs
		t3_1foa37k	Pensam em sair do brasil, viajar, conhecer novos lugares afora ?	FALSE			reddit	pensam em sair do brasil viajar conhecer novos lugares afora	pensam em sair do brasil viajar conhecer novos lugares afora	['pensam', 'em', 'sair', 'do', 'brasil', 'viajar', 'conhecer', 'novos', 'lugares', 'afora']	pensam em sair do brasil viajar conhecer novos lugares afora	10	Onde	1	10	A pergunta está relacionada ao desejo ou plano de sair do Brasil para "viajar, conhecer novos lugares afora". Isto implica em busca ou interesse por novos locais ao redor do mundo, o que se alinha com a categoria "Onde", que se refere a questões sobre localização ou lugares.		t3_1foa37k
		t3_1fny3aw	Bolacha/biscoito Chocolícia é realmente boa ou é superestimada?	FALSE			reddit	bolachabiscoito chocolicia e realmente boa ou e superestimada	bolachabiscoito chocolicia e realmente boa ou e superestimada	['bolachabiscoito', 'chocolicia', 'e', 'realmente', 'boa', 'ou', 'e', 'superestimada']	bolachabiscoito chocolicia e realmente boa ou e superestimada	8	Outro	0.875	7	A pergunta busca uma opinião pessoal ou avaliação subjetiva sobre a qualidade de um produto (bolacha/biscoito Chocolícia) e não se enquadra em nenhuma das categorias específicas como ação, justificativa, autor, localização, tempo, método ou custo.		t3_1fny3aw
		t3_1fni4b4	Pretendem deixa de mora com os pais com que idade?	FALSE			reddit	pretendem deixa de mora com os pais com que idade	pretendem deixa de mora com os pais com que idade	['pretendem', 'deixa', 'de', 'mora', 'com', 'os', 'pais', 'com', 'que', 'idade']	pretendem deixa de mora com os pais com que idade	10	Quando	0.9	9	A pergunta "Pretendem deixa de mora com os pais com que idade?" busca saber em que momento (idade) uma pessoa pretende realizar a ação de deixar de morar com os pais, sendo assim uma questão de ordem cronológica. Portanto, a categoria mais adequada para classificar esta pergunta é "Quando".		t3_1fni4b4
		t3_1fo258o	Preciso de algum repertório para ler "Sapiens: Uma breve história da humanidade"?	FALSE			reddit	preciso de algum repertorio para ler sapiens uma breve historia da humanidade	preciso de algum repertorio para ler sapiens uma breve historia da humanidade	['preciso', 'de', 'algum', 'repertorio', 'para', 'ler', 'sapiens', 'uma', 'breve', 'historia', 'da', 'humanidade']	preciso de algum repertorio para ler sapiens uma breve historia da humanidade	12	O quê	1	12	A pergunta busca identificar se há alguma ação a ser executada, ou seja, se é necessário algum conhecimento ou material específico (repertório) antes de ler o livro "Sapiens: Uma breve história da humanidade". Portanto, enquadra-se na categoria "O quê", que se refere à identificação ou definição de ações a serem tomadas ou necessidades a serem supridas antes de realizar uma atividade específica.		t3_1fo258o
		t3_1fo50sz	Vocês ainda continuam no nofap ou já perderam?	FALSE			reddit	voces ainda continuam no nofap ou ja perderam	voces ainda continuam no nofap ou ja perderam	['voces', 'ainda', 'continuam', 'no', 'nofap', 'ou', 'ja', 'perderam']	voces ainda continuam no nofap ou ja perderam	8	Quem	1	8	A pergunta inquire sobre a continuidade ou desistência de um grupo de pessoas, implícito no uso de "vocês", no desafio conhecido como "nofap". Assim, busca-se identificar quem está continuando ou quem já desistiu, focalizando nas pessoas envolvidas na ação.		t3_1fo50sz
		t3_1fnz1a6	A promoção da Semana do Cinema está válida para os dias 24 e 25/09? Olhei aki no app e não está, será que na bilheteira pago R$ 12?	FALSE			reddit	a promocao da semana do cinema esta valida para os dias 24 e 2509 olhei aki no app e nao esta sera que na bilheteira pago r$ 12	a promocao da semana do cinema esta valida para os dias 24 e 2509 olhei aki no app e nao esta sera que na bilheteira pago r$ 12	['a', 'promocao', 'da', 'semana', 'do', 'cinema', 'esta', 'valida', 'para', 'os', 'dias', '24', 'e', '2509', 'olhei', 'aki', 'no', 'app', 'e', 'nao', 'esta', 'sera', 'que', 'na', 'bilheteira', 'pago', 'r$', '12']	a promocao da semana do cinema esta valida para os dias 24 e 2509 olhei aki no app e nao esta sera que na bilheteira pago r$ 12	28	Quando	0.928571	26	A pergunta "A promoção da Semana do Cinema está válida para os dias 24 e 25/09?" está buscando informação relacionada ao período de validade da promoção, que envolve datas específicas. Portanto, é uma pergunta de ordem cronológica, enquadrando-se na categoria "Quando".		t3_1fnz1a6
		t3_1fnau71	Tem 9,6 milhões de pessoas no Brasil que não estudam e nem trabalham. Você conhece alguém que não faz nada da vida?	FALSE			reddit	tem 96 milhoes de pessoas no brasil que nao estudam e nem trabalham voce conhece alguem que nao faz nada da vida	tem 96 milhoes de pessoas no brasil que nao estudam e nem trabalham voce conhece alguem que nao faz nada da vida	['tem', '96', 'milhoes', 'de', 'pessoas', 'no', 'brasil', 'que', 'nao', 'estudam', 'e', 'nem', 'trabalham', 'voce', 'conhece', 'alguem', 'que', 'nao', 'faz', 'nada', 'da', 'vida']	tem 96 milhoes de pessoas no brasil que nao estudam e nem trabalham voce conhece alguem que nao faz nada da vida	22	Quem	0.909091	20	A pergunta busca saber sobre indivíduos específicos que a pessoa conhece que estão na condição de não estudar e não trabalhar. Portanto, trata-se de identificar pessoas específicas que se encaixam nessa situação.		t3_1fnau71
		t3_1fnv100	Vocês fazem meditação ou gostariam de meditar? Acham importante?	FALSE			reddit	voces fazem meditacao ou gostariam de meditar acham importante	voces fazem meditacao ou gostariam de meditar acham importante	['voces', 'fazem', 'meditacao', 'ou', 'gostariam', 'de', 'meditar', 'acham', 'importante']	voces fazem meditacao ou gostariam de meditar acham importante	9	Outro	1	9	A pergunta "Vocês fazem meditação ou gostariam de meditar? Acham importante?" não se enquadra nas categorias apresentadas, pois não está buscando uma ação específica, justificativa, responsável, local, momento cronológico, maneira ou custo. Em vez disso, é uma pergunta voltada para a preferência e opinião pessoal do interlocutor sobre a prática da meditação, que não se adequa nas sete categorias …		t3_1fnv100
		t3_1fnllgm	Ser classe média no Brasil ou classe média alta na Micronesia ?	FALSE			reddit	ser classe media no brasil ou classe media alta na micronesia	ser classe media no brasil ou classe media alta na micronesia	['ser', 'classe', 'media', 'no', 'brasil', 'ou', 'classe', 'media', 'alta', 'na', 'micronesia']	ser classe media no brasil ou classe media alta na micronesia	11	Outro	0.818182	9	A pergunta apresentada não se encaixa diretamente em nenhuma das categorias listadas. Ela parece ser mais uma questão de opinião ou preferência pessoal entre ser classe média no Brasil ou classe média alta na Micronésia. Não há uma solicitação clara por ação, informação específica de custo, tempo, local, método, justificativa ou identificação de responsáveis, o que dificulta a sua classificação n…		t3_1fnllgm
		t3_1fn3stx	Que trauma a pobreza gerou na vida de vocês, trazendo reflexos na vida adulta?	FALSE			reddit	que trauma a pobreza gerou na vida de voces trazendo reflexos na vida adulta	que trauma a pobreza gerou na vida de voces trazendo reflexos na vida adulta	['que', 'trauma', 'a', 'pobreza', 'gerou', 'na', 'vida', 'de', 'voces', 'trazendo', 'reflexos', 'na', 'vida', 'adulta']	que trauma a pobreza gerou na vida de voces trazendo reflexos na vida adulta	14	O quê	0.857143	12	A pergunta está buscando identificar qual trauma foi gerado pela pobreza na vida das pessoas, e também os reflexos desse trauma na vida adulta. Ao perguntar "Que trauma...", a pergunta está tentando identificar "qual é" o trauma, o que se alinha mais com a categoria "O quê," que se refere a identificação de algo ou de um problema.		t3_1fn3stx
		t3_1fnaa9r	E vocês, comeram alguém ou só gastaram dinheiro nesse fds?	FALSE			reddit	e voces comeram alguem ou so gastaram dinheiro nesse fds	e voces comeram alguem ou so gastaram dinheiro nesse fds	['e', 'voces', 'comeram', 'alguem', 'ou', 'so', 'gastaram', 'dinheiro', 'nesse', 'fds']	e voces comeram alguem ou so gastaram dinheiro nesse fds	10	Quem	1	10	A pergunta "E vocês, comeram alguém ou só gastaram dinheiro nesse fds?" está questionando quem foi a pessoa que os interlocutores "comeram" (no sentido de manter relação sexual) durante o fim de semana. É uma pergunta sobre quem executou a ação, ainda que de forma coloquial e informal. O uso de "alguém" sugere que a pergunta foca na identidade da pessoa envolvida na ação.		t3_1fnaa9r
		t3_1fn1udt	O Reddit já te ajudou em alguma coisa?	FALSE			reddit	o reddit ja te ajudou em alguma coisa	o reddit ja te ajudou em alguma coisa	['o', 'reddit', 'ja', 'te', 'ajudou', 'em', 'alguma', 'coisa']	o reddit ja te ajudou em alguma coisa	8	O quê	1	8	A pergunta busca identificar se algo foi feito ou ocorreu como resultado da ajuda do Reddit. Está solicitando por uma ação ou resultado específico (alguma coisa) em que o Reddit tenha sido útil ou contribuído.		t3_1fn1udt
		t3_1fmu60g	Que assunto não se deve conversar num primeiro encontro?	FALSE			reddit	que assunto nao se deve conversar num primeiro encontro	que assunto nao se deve conversar num primeiro encontro	['que', 'assunto', 'nao', 'se', 'deve', 'conversar', 'num', 'primeiro', 'encontro']	que assunto nao se deve conversar num primeiro encontro	9	O quê	1	9	A pergunta busca identificar qual assunto específico deve ser evitado em uma situação particular, ou seja, está pedindo uma categoria ou tipo de assunto, o que se alinha com a busca por uma ação ou identificação de algo.		t3_1fmu60g
		t3_1fn4rr7	Na sua opinião, oque acham da faculdade?	FALSE			reddit	na sua opiniao oque acham da faculdade	na sua opiniao oque acham da faculdade	['na', 'sua', 'opiniao', 'oque', 'acham', 'da', 'faculdade']	na sua opiniao oque acham da faculdade	7	Outro	1	7	A pergunta "Na sua opinião, o que acham da faculdade?" é uma solicitação de opinião ou perspectiva pessoal. Ela não busca uma ação, justificativa, responsável, localização, cronologia, método ou custo, mas sim uma avaliação ou julgamento subjetivo. Portanto, não se encaixa nas categorias específicas listadas.		t3_1fn4rr7
		t3_1fn3feb	Você tem muitas ou poucas roupas?	FALSE			reddit	voce tem muitas ou poucas roupas	voce tem muitas ou poucas roupas	['voce', 'tem', 'muitas', 'ou', 'poucas', 'roupas']	voce tem muitas ou poucas roupas	6	Quanto	1	6	A pergunta "Você tem muitas ou poucas roupas?" está indagando sobre a quantidade de roupas que uma pessoa possui, o que está relacionado à noção de "quanto". A pergunta busca uma medida ou quantidade relativa (muitas ou poucas), que se refere diretamente à categoria "Quanto".		t3_1fn3feb
		t3_1fni1lc	Tem um subreddit igual r/drugs mas em português?	FALSE			reddit	tem um subreddit igual rdrugs mas em portugues	tem um subreddit igual rdrugs mas em portugues	['tem', 'um', 'subreddit', 'igual', 'rdrugs', 'mas', 'em', 'portugues']	tem um subreddit igual rdrugs mas em portugues	8	Onde	1	8	A pergunta está em busca de um subreddit específico, ou seja, um lugar virtual em uma plataforma de discussão (Reddit) que seja equivalente ao r/drugs, mas em língua portuguesa. Portanto, ela se enquadra na categoria "Onde", pois está procurando a localização de uma comunidade online específica.		t3_1fni1lc
		t3_1fn5wdg	Namoral, vocês professores de escola pública. Vale a pena ser professor hoje em dia?	FALSE			reddit	namoral voces professores de escola publica vale a pena ser professor hoje em dia	namoral voces professores de escola publica vale a pena ser professor hoje em dia	['namoral', 'voces', 'professores', 'de', 'escola', 'publica', 'vale', 'a', 'pena', 'ser', 'professor', 'hoje', 'em', 'dia']	namoral voces professores de escola publica vale a pena ser professor hoje em dia	14	O quê	1	14	A pergunta "Vale a pena ser professor hoje em dia?" busca entender a ação de ser professor e se ainda é uma boa escolha, ou seja, se é algo vantajoso ou compensador atualmente. Portanto, está em busca de uma resposta sobre a validação ou não de uma ação específica, que é ser professor.		t3_1fn5wdg
		t3_1fn6rck	Você limpa o bumbum em pé ou sentado?	FALSE			reddit	voce limpa o bumbum em pe ou sentado	voce limpa o bumbum em pe ou sentado	['voce', 'limpa', 'o', 'bumbum', 'em', 'pe', 'ou', 'sentado']	voce limpa o bumbum em pe ou sentado	8	Outro	1	8	A pergunta busca saber a preferência individual de alguém sobre uma ação cotidiana e não se enquadra em nenhuma das categorias listadas, pois não é sobre uma ação a ser executada, justificativa, responsável, localização, momento, maneira de acontecer ou custo.		t3_1fn6rck
		t3_1fn6hph	Você pagaria pra alguém limpar sua caixa de e-mail e separar e-mails importantes?	FALSE			reddit	voce pagaria pra alguem limpar sua caixa de email e separar emails importantes	voce pagaria pra alguem limpar sua caixa de email e separar emails importantes	['voce', 'pagaria', 'pra', 'alguem', 'limpar', 'sua', 'caixa', 'de', 'email', 'e', 'separar', 'emails', 'importantes']	voce pagaria pra alguem limpar sua caixa de email e separar emails importantes	13	Quanto	1	13	A pergunta "Você pagaria pra alguém limpar sua caixa de e-mail e separar e-mails importantes?" está relacionada ao custo de uma ação, nesse caso, ao pagamento por um serviço. Assim, pode ser classificada na categoria "Quanto", já que envolve a consideração de um custo financeiro.		t3_1fn6hph
		t3_1fn4rvg	Essa coisa de "pessoa certa" realmente existe?	FALSE			reddit	essa coisa de pessoa certa realmente existe	essa coisa de pessoa certa realmente existe	['essa', 'coisa', 'de', 'pessoa', 'certa', 'realmente', 'existe']	essa coisa de pessoa certa realmente existe	7	Outro	1	7	A pergunta "Essa coisa de 'pessoa certa' realmente existe?" é mais filosófica e abstrata, buscando entender a existência ou conceito de uma "pessoa certa". Não se enquadra nas categorias de busca por ação, justificação, identificação de responsáveis, localização, cronologia, métodos, ou custo. Portanto, a categoria mais adequada é "Outro".		t3_1fn4rvg
		t3_1fmwh9c	Você gosta de cozinhar? De 0 a 10, o quão bom na cozinha você é?	FALSE			reddit	voce gosta de cozinhar de 0 a 10 o quao bom na cozinha voce e	voce gosta de cozinhar de 0 a 10 o quao bom na cozinha voce e	['voce', 'gosta', 'de', 'cozinhar', 'de', '0', 'a', '10', 'o', 'quao', 'bom', 'na', 'cozinha', 'voce', 'e']	voce gosta de cozinhar de 0 a 10 o quao bom na cozinha voce e	15	Outro	0.866667	13	A pergunta está solicitando uma opinião pessoal sobre gostar de cozinhar e uma autoavaliação subjetiva da habilidade na cozinha, em uma escala de 0 a 10. Este tipo de avaliação pessoal e subjetiva não se encaixa claramente nas categorias listadas, que se concentram em informações mais objetivas ou factuais relacionadas a ações, motivos, pessoas, locais, tempo, métodos ou custos.		t3_1fmwh9c
		t3_1fmqg0d	A partir de que temperatura você já considera frio?	FALSE			reddit	a partir de que temperatura voce ja considera frio	a partir de que temperatura voce ja considera frio	['a', 'partir', 'de', 'que', 'temperatura', 'voce', 'ja', 'considera', 'frio']	a partir de que temperatura voce ja considera frio	9	Quanto	1	9	A pergunta "A partir de que temperatura você já considera frio?" envolve a determinação de uma quantidade específica (neste caso, a temperatura) que serve como limite ou ponto de referência para considerar algo frio. Portanto, relaciona-se a uma medida de quantidade, tanto quanto a interpretações podem variar, mas ainda estão relacionadas a valores numéricos de temperatura.		t3_1fmqg0d
		t3_1fn2vr0	Você que não é de exatas, de 0 a 10, quão rápida é a sua cabeça na hora de fazer contas matemáticas?	FALSE			reddit	voce que nao e de exatas de 0 a 10 quao rapida e a sua cabeca na hora de fazer contas matematicas	voce que nao e de exatas de 0 a 10 quao rapida e a sua cabeca na hora de fazer contas matematicas	['voce', 'que', 'nao', 'e', 'de', 'exatas', 'de', '0', 'a', '10', 'quao', 'rapida', 'e', 'a', 'sua', 'cabeca', 'na', 'hora', 'de', 'fazer', 'contas', 'matematicas']	voce que nao e de exatas de 0 a 10 quao rapida e a sua cabeca na hora de fazer contas matematicas	22	Quanto	0.818182	18	A pergunta está solicitando uma avaliação numérica de quão rápido alguém realiza cálculos matemáticos, que pode ser interpretada como o tempo ou a eficiência com que a tarefa é realizada. "De 0 a 10" normalmente implica uma medição quantitativa em termos de rapidez, portanto, é classificada como "Quanto" pois envolve uma avaliação de proporção ou quantidade no desempenho de um indivíduo em fazer …		t3_1fn2vr0
		t3_1fmu66t	Vocês também se sentem mais vazios depois de socializar na internet?	FALSE			reddit	voces tambem se sentem mais vazios depois de socializar na internet	voces tambem se sentem mais vazios depois de socializar na internet	['voces', 'tambem', 'se', 'sentem', 'mais', 'vazios', 'depois', 'de', 'socializar', 'na', 'internet']	voces tambem se sentem mais vazios depois de socializar na internet	11	Outro	1	11	A pergunta é uma reflexão pessoal ou um questionamento sobre um sentimento subjetivo que não se encaixa nas categorias específicas de ação, justificativa, responsável, local, tempo, método ou custo. Não busca uma resposta factual ou informativa, mas sim compartilhar ou indagar sobre uma experiência emocional. Portanto, não consegue ser classificada nas categorias fornecidas.		t3_1fmu66t
		t3_1fmtjt3	Se você já tivesse perdido as esperanças e decidido fazer aquela viagem eterna, deixaria um bilhete explicando seus motivos ou isso também já não lhe importaria mais ?	FALSE			reddit	se voce ja tivesse perdido as esperancas e decidido fazer aquela viagem eterna deixaria um bilhete explicando seus motivos ou isso tambem ja nao lhe importaria mais	se voce ja tivesse perdido as esperancas e decidido fazer aquela viagem eterna deixaria um bilhete explicando seus motivos ou isso tambem ja nao lhe importaria mais	['se', 'voce', 'ja', 'tivesse', 'perdido', 'as', 'esperancas', 'e', 'decidido', 'fazer', 'aquela', 'viagem', 'eterna', 'deixaria', 'um', 'bilhete', 'explicando', 'seus', 'motivos', 'ou', 'isso', 'tambem', 'ja', 'nao', 'lhe', 'importaria', 'mais']	se voce ja tivesse perdido as esperancas e decidido fazer aquela viagem eterna deixaria um bilhete explicando seus motivos ou isso tambem ja nao lhe importaria mais	27	Por quê	0.962963	26	A pergunta busca justificativas ou motivos relacionados a uma decisão pessoal e emocional, questionando se a pessoa deixaria um bilhete explicando seus motivos. Portanto, se enquadra na categoria "Por quê", pois trata da razão ou justificativa subjacente à ação de deixar ou não o bilhete.		t3_1fmtjt3
		t3_1fmr3xd	O sus libera remédios pro TDAH sem o laudo, porém com receita?	FALSE			reddit	o sus libera remedios pro tdah sem o laudo porem com receita	o sus libera remedios pro tdah sem o laudo porem com receita	['o', 'sus', 'libera', 'remedios', 'pro', 'tdah', 'sem', 'o', 'laudo', 'porem', 'com', 'receita']	o sus libera remedios pro tdah sem o laudo porem com receita	12	O quê	0.916667	11	A pergunta está essencialmente em busca de uma informação específica sobre a política de liberação de remédios pelo SUS para TDAH. Está questionando se a ação de liberar remédios pode ser realizada sem um laudo, apenas com receita, portanto, é uma pergunta que busca identificar uma ação ou procedimento específico.		t3_1fmr3xd
		t3_1fmcygo	Vocês também perceberam que o gosto da Coca-Cola tá diferente?	FALSE			reddit	voces tambem perceberam que o gosto da cocacola ta diferente	voces tambem perceberam que o gosto da cocacola ta diferente	['voces', 'tambem', 'perceberam', 'que', 'o', 'gosto', 'da', 'cocacola', 'ta', 'diferente']	voces tambem perceberam que o gosto da cocacola ta diferente	10	Como	1	10	A pergunta busca entender o estado atual do produto, questionando se o gosto da Coca-Cola está diferente. Isso está relacionado a uma avaliação ou percepção de mudança, o que se enquadra na categoria "Como", pois a pessoa está questionando sobre como está o gosto atual em comparação com antes.		t3_1fmcygo
		t3_1fmegzk	Com que frequência vocês tem paralisia do sono?	FALSE			reddit	com que frequencia voces tem paralisia do sono	com que frequencia voces tem paralisia do sono	['com', 'que', 'frequencia', 'voces', 'tem', 'paralisia', 'do', 'sono']	com que frequencia voces tem paralisia do sono	8	Quanto	1	8	A pergunta busca saber a frequência com que alguém tem paralisia do sono, o que está relacionado a quantas vezes ou com que regularidade ocorre, envolvendo assim uma questão de quantidade de tempo ou eventos. Portanto, está enquadrada na categoria "Quanto".		t3_1fmegzk
		t3_1fmcnp3	Você compraria um IPhone 13 usado ou o último celular lançado e também o mais avançado da LG ?	FALSE			reddit	voce compraria um iphone 13 usado ou o ultimo celular lancado e tambem o mais avancado da lg	voce compraria um iphone 13 usado ou o ultimo celular lancado e tambem o mais avancado da lg	['voce', 'compraria', 'um', 'iphone', '13', 'usado', 'ou', 'o', 'ultimo', 'celular', 'lancado', 'e', 'tambem', 'o', 'mais', 'avancado', 'da', 'lg']	voce compraria um iphone 13 usado ou o ultimo celular lancado e tambem o mais avancado da lg	18	O quê	0.944444	17	A pergunta está solicitando uma escolha entre duas opções de compra: um iPhone 13 usado ou o último celular lançado e mais avançado da LG. Assim, ela busca identificar qual dessas ações ou opções de compra seria tomada pela pessoa que responde. Portanto, está relacionada à categoria "O quê", que é usada para perguntas que buscam identificar ações, objetos ou opções.		t3_1fmcnp3
		t3_1fmjs4m	Acham que o vt uol daria certo hj em dia ?	FALSE			reddit	acham que o vt uol daria certo hj em dia	acham que o vt uol daria certo hj em dia	['acham', 'que', 'o', 'vt', 'uol', 'daria', 'certo', 'hj', 'em', 'dia']	acham que o vt uol daria certo hj em dia	10	Outro	1	10	A pergunta solicita uma opinião sobre a viabilidade de algo ("vt uol") nos dias atuais. Ela não se encaixa claramente em nenhuma das categorias definidas como ela não busca identificar algo específico (O quê), nem justificativas (Por quê), não foca em personagens (Quem), localização (Onde), tempos (Quando), métodos (Como) ou quantidade ou custo (Quanto). É uma pergunta mais aberta e subjetiva sob…		t3_1fmjs4m
		t3_1fmhmkq	Da pra ganhar dinheiro com o reddit? Os moderadores são voluntários?	FALSE			reddit	da pra ganhar dinheiro com o reddit os moderadores sao voluntarios	da pra ganhar dinheiro com o reddit os moderadores sao voluntarios	['da', 'pra', 'ganhar', 'dinheiro', 'com', 'o', 'reddit', 'os', 'moderadores', 'sao', 'voluntarios']	da pra ganhar dinheiro com o reddit os moderadores sao voluntarios	11	O quê	1	11	A pergunta busca entender se é possível executar uma ação específica, que neste caso é ganhar dinheiro através do Reddit. A questão sobre os moderadores serem voluntários também busca identificar o status deles (se são pagos ou voluntários), o que se alinha à categoria "O quê" ao tentar identificar o estado ou natureza do papel dos moderadores.		t3_1fmhmkq
		t3_1fmgjqf	Alguém conhece alguma comunidade brasileira pra desenhos animados?	FALSE			reddit	alguem conhece alguma comunidade brasileira pra desenhos animados	alguem conhece alguma comunidade brasileira pra desenhos animados	['alguem', 'conhece', 'alguma', 'comunidade', 'brasileira', 'pra', 'desenhos', 'animados']	alguem conhece alguma comunidade brasileira pra desenhos animados	8	Onde	1	8	A pergunta está solicitando indicações de lugares, no caso, comunidades brasileiras, que estão relacionadas a desenhos animados. Isso se classifica como um pedido de indicação sobre onde encontrar um tipo específico de comunidade, que se encaixa na categoria "Onde".		t3_1fmgjqf
		t3_1fm3994	Você tem vergonha de ser feliz?	FALSE			reddit	voce tem vergonha de ser feliz	voce tem vergonha de ser feliz	['voce', 'tem', 'vergonha', 'de', 'ser', 'feliz']	voce tem vergonha de ser feliz	6	Outro	1	6	A pergunta "Você tem vergonha de ser feliz?" não se encaixa nas categorias propostas, pois trata-se de uma pergunta pessoal e introspectiva sobre sentimentos, não buscando identificar uma ação, motivação, responsável, local, tempo, método ou custo. Portanto, a melhor classificação é "Outro".		t3_1fm3994
		t3_1fls60k	Só uma curiosidade, mas tem mesmo gente que paga quase R$300,00 por uma imagem de perfil no Reddit?	FALSE			reddit	so uma curiosidade mas tem mesmo gente que paga quase r$30000 por uma imagem de perfil no reddit	so uma curiosidade mas tem mesmo gente que paga quase r$30000 por uma imagem de perfil no reddit	['so', 'uma', 'curiosidade', 'mas', 'tem', 'mesmo', 'gente', 'que', 'paga', 'quase', 'r$', '30000', 'por', 'uma', 'imagem', 'de', 'perfil', 'no', 'reddit']	so uma curiosidade mas tem mesmo gente que paga quase r$ 30000 por uma imagem de perfil no reddit	19	Quanto	0.947368	18	A pergunta questiona o valor pago por uma imagem de perfil no Reddit, focando especificamente no custo financeiro (quase R$300,00). Isso a classifica na categoria "Quanto", já que está relacionada ao preço ou custo de algo.		t3_1fls60k
		t3_1fmcmle	Você compra produtos de contr4band0?	FALSE			reddit	voce compra produtos de contr4band0	voce compra produtos de contr4band0	['voce', 'compra', 'produtos', 'de', 'contr4band0']	voce compra produtos de contr4band0	5	Quem	1	5	A pergunta está procurando identificar quem entre os inquiridos (ou a pessoa a quem a pergunta foi dirigida) pratica a ação de comprar produtos de contrabando. Assim, a pergunta está na categoria "Quem", pois busca saber quem realiza essa ação específica.		t3_1fmcmle
		t3_1flzupt	Existe destino ou você faz seu próprio destino?	FALSE			reddit	existe destino ou voce faz seu proprio destino	existe destino ou voce faz seu proprio destino	['existe', 'destino', 'ou', 'voce', 'faz', 'seu', 'proprio', 'destino']	existe destino ou voce faz seu proprio destino	8	Outro	0.875	7	A pergunta "Existe destino ou você faz seu próprio destino?" é uma questão filosófica que busca discutir a natureza do destino e do livre arbítrio. Não se encaixa especificamente em nenhuma das categorias listadas, pois não busca uma ação, justificativa, localização, cronologia, método ou custo. Em vez disso, a pergunta convida à reflexão sobre conceitos abstratos, por isso é classificada como "O…		t3_1flzupt
		t3_1fm03br	Vocês costumam dar nomes pros cachorros de rua que vocês veem?	FALSE			reddit	voces costumam dar nomes pros cachorros de rua que voces veem	voces costumam dar nomes pros cachorros de rua que voces veem	['voces', 'costumam', 'dar', 'nomes', 'pros', 'cachorros', 'de', 'rua', 'que', 'voces', 'veem']	voces costumam dar nomes pros cachorros de rua que voces veem	11	O quê	0.909091	10	A pergunta busca saber se a ação de dar nomes para cachorros de rua é algo que é costumeiramente feito pelos leitores. Ela se refere a uma prática ou ação específica, categorizada como "o quê".		t3_1fm03br
		t3_1fm5z87	É possível ganhar dinheiro com o Canva hoje em dia?	FALSE			reddit	e possivel ganhar dinheiro com o canva hoje em dia	e possivel ganhar dinheiro com o canva hoje em dia	['e', 'possivel', 'ganhar', 'dinheiro', 'com', 'o', 'canva', 'hoje', 'em', 'dia']	e possivel ganhar dinheiro com o canva hoje em dia	10	Como	1	10	A pergunta "É possível ganhar dinheiro com o Canva hoje em dia?" está buscando entender de que maneira ou método pode-se obter lucro utilizando o Canva como ferramenta. Isso se refere a como uma ação pode ser executada ou ocorrer, portanto, encaixa-se na categoria "Como".		t3_1fm5z87
		t3_1flso5v	você preferia morar na rua ou ser preso?	FALSE			reddit	voce preferia morar na rua ou ser preso	voce preferia morar na rua ou ser preso	['voce', 'preferia', 'morar', 'na', 'rua', 'ou', 'ser', 'preso']	voce preferia morar na rua ou ser preso	8	Outro	1	8	A pergunta "você preferia morar na rua ou ser preso?" refere-se a uma escolha pessoal entre duas situações hipotéticas de vida. Não busca uma ação, justificativa, localização, pessoa, tempo, maneira ou custo. Em vez disso, é uma questão de preferência individual sem um critério específico que se encaixe nas categorias listadas.		t3_1flso5v
		t3_1fm6719	Miau miau miau mi miau?	FALSE			reddit	miau miau miau mi miau	miau miau miau mi miau	['miau', 'miau', 'miau', 'mi', 'miau']	miau miau miau mi miau	5	Outro	0.4	2	A pergunta "Miau miau miau mi miau?" não contém informações suficientes para determinar o contexto ou a intenção subjacente. Sem um contexto claro ou sem estrutura linguística reconhecível, não é possível classificá-la em nenhuma das categorias definidas (O quê, Por quê, Quem, Onde, Quando, Como, Quanto). Portanto, ela foi classificada como "Outro".		t3_1fm6719
		t3_1flt2iw	Dicas para melhorar a comunicação?	FALSE			reddit	dicas para melhorar a comunicacao	dicas para melhorar a comunicacao	['dicas', 'para', 'melhorar', 'a', 'comunicacao']	dicas para melhorar a comunicacao	5	Como	1	5	A pergunta "Dicas para melhorar a comunicação?" está buscando orientações ou métodos sobre como realizar uma ação, neste caso, melhorar a comunicação. Nesse sentido, ela se alinha a perguntas de metodologia, que se encaixam na categoria "Como".		t3_1flt2iw
		t3_1flexld	As pessoas pararam de se cumprimentar com beijos na bochecha?	FALSE			reddit	as pessoas pararam de se cumprimentar com beijos na bochecha	as pessoas pararam de se cumprimentar com beijos na bochecha	['as', 'pessoas', 'pararam', 'de', 'se', 'cumprimentar', 'com', 'beijos', 'na', 'bochecha']	as pessoas pararam de se cumprimentar com beijos na bochecha	10	O quê	1	10	A pergunta busca identificar uma mudança de comportamento social, ou seja, se a ação de cumprimentar com beijos na bochecha parou ou não. Trata-se de uma questão sobre se algo está ou não ocorrendo, que se enquadra na categoria "O quê", pois quer definir se uma ação foi alterada ou interrompida.		t3_1flexld
		t3_1fltu15	Vocês costumam ficar com pessoas que não consideram atraentes?	FALSE			reddit	voces costumam ficar com pessoas que nao consideram atraentes	voces costumam ficar com pessoas que nao consideram atraentes	['voces', 'costumam', 'ficar', 'com', 'pessoas', 'que', 'nao', 'consideram', 'atraentes']	voces costumam ficar com pessoas que nao consideram atraentes	9	Outro	1	9	A pergunta "Vocês costumam ficar com pessoas que não consideram atraentes?" não se encaixa diretamente em nenhuma das oito categorias específicas (O quê, Por quê, Quem, Onde, Quando, Como, Quanto). Ela parece mais uma pergunta sobre hábitos ou comportamentos pessoais, sem buscar uma ação específica, justificação, identificação de pessoas, localização, cronologia, método ou custo. Portanto, "Outro…		t3_1fltu15
		t3_1fluhfe	Oq faço para deixar um site de filmes e séries esteticamente mais atraente?	FALSE			reddit	oq faco para deixar um site de filmes e series esteticamente mais atraente	oq faco para deixar um site de filmes e series esteticamente mais atraente	['oq', 'faco', 'para', 'deixar', 'um', 'site', 'de', 'filmes', 'e', 'series', 'esteticamente', 'mais', 'atraente']	oq faco para deixar um site de filmes e series esteticamente mais atraente	13	O quê	1	13	A pergunta "Oq faço para deixar um site de filmes e séries esteticamente mais atraente?" está solicitando uma ação ou solução específica para melhorar a estética de um site. Está buscando identificar o que pode ser feito para alcançar o objetivo desejado. Isso se encaixa na categoria "O quê", pois está em busca de uma ação a ser realizada.		t3_1fluhfe
		t3_1flcuy0	Você tem vontade de colocar piercings ou fazer tatuagens?	FALSE			reddit	voce tem vontade de colocar piercings ou fazer tatuagens	voce tem vontade de colocar piercings ou fazer tatuagens	['voce', 'tem', 'vontade', 'de', 'colocar', 'piercings', 'ou', 'fazer', 'tatuagens']	voce tem vontade de colocar piercings ou fazer tatuagens	9	Outro	1	9	A pergunta aborda questões de desejo ou intenção pessoal, que não se enquadram nas categorias de ação, justificativa, pessoa, local, tempo, método ou custo. É uma pergunta sobre preferências individuais, não buscando uma informação específica dentro das categorias fornecidas.		t3_1flcuy0
		t3_1flowxg	Quantas vezes vocês lavam o banheiro no mês?	FALSE			reddit	quantas vezes voces lavam o banheiro no mes	quantas vezes voces lavam o banheiro no mes	['quantas', 'vezes', 'voces', 'lavam', 'o', 'banheiro', 'no', 'mes']	quantas vezes voces lavam o banheiro no mes	8	Quanto	1	8	A pergunta "Quantas vezes vocês lavam o banheiro no mês?" está relacionada à quantidade ou frequência com que uma ação (lavar o banheiro) é realizada em um determinado período de tempo (por mês). Assim, ela busca uma resposta numérica ou de frequência, encaixando-se na categoria "Quanto" que envolve saber o custo de algo em termos de tempo ou recursos.		t3_1flowxg
		t3_1fll9xb	Você iriam em uma festa de um parente sendo convidado por um convidado e não pelo organizador do evento ?	FALSE			reddit	voce iriam em uma festa de um parente sendo convidado por um convidado e nao pelo organizador do evento	voce iriam em uma festa de um parente sendo convidado por um convidado e nao pelo organizador do evento	['voce', 'iriam', 'em', 'uma', 'festa', 'de', 'um', 'parente', 'sendo', 'convidado', 'por', 'um', 'convidado', 'e', 'nao', 'pelo', 'organizador', 'do', 'evento']	voce iriam em uma festa de um parente sendo convidado por um convidado e nao pelo organizador do evento	19	Outro	0.894737	17	A pergunta faz uma sondagem hipotética sobre a disposição ou decisão pessoal de ir ou não a uma festa nessas circunstâncias, sem buscar uma ação específica, justificativa, sujeito, local, tempo, método ou custo. Portanto, não se encaixa em nenhuma das categorias definidas.		t3_1fll9xb
		t3_1flnput	Conhecem algum site para baixar software pago de graça?	FALSE			reddit	conhecem algum site para baixar software pago de graca	conhecem algum site para baixar software pago de graca	['conhecem', 'algum', 'site', 'para', 'baixar', 'software', 'pago', 'de', 'graca']	conhecem algum site para baixar software pago de graca	9	Onde	1	9	A pergunta está pedindo uma indicação de local, no caso, um site, que possa ser usado para baixar software pago de graça. Isso se encaixa na categoria "Onde" pois está perguntando sobre um local (virtual) específico para realizar uma ação específica.		t3_1flnput
		t3_1flpatn	O dinheiro é a única coisa que é unanimidade no mundo?	FALSE			reddit	o dinheiro e a unica coisa que e unanimidade no mundo	o dinheiro e a unica coisa que e unanimidade no mundo	['o', 'dinheiro', 'e', 'a', 'unica', 'coisa', 'que', 'e', 'unanimidade', 'no', 'mundo']	o dinheiro e a unica coisa que e unanimidade no mundo	11	Outro	0.909091	10	A pergunta não está buscando uma ação a ser executada, uma justificativa, responsável, localização, tempo, método ou custo. Ela é uma reflexão sobre a unanimidade ou universalidade do valor do dinheiro no mundo, o que não se enquadra em nenhuma das categorias específicas fornecidas.		t3_1flpatn
		t3_1fltyoy	O ódio é uma raiva mais racional?	FALSE			reddit	o odio e uma raiva mais racional	o odio e uma raiva mais racional	['o', 'odio', 'e', 'uma', 'raiva', 'mais', 'racional']	o odio e uma raiva mais racional	7	Outro	1	7	A pergunta "O ódio é uma raiva mais racional?" se refere à definição ou exploração conceitual das emoções "ódio" e "raiva" e sua relação, mas não se encaixa claramente em nenhuma das categorias de ação, justificativa, identificação de responsável ou temporalidade mencionadas, como "O quê", "Por quê", "Quem", "Onde", "Quando", "Como" ou "Quanto". Portanto, essa pergunta é melhor classificada como …		t3_1fltyoy
		t3_1flk9ou	Cidadão brasileiro em estado refratário no serviço militar obrigatório é obrigado a servir mesmo se recusando?	FALSE			reddit	cidadao brasileiro em estado refratario no servico militar obrigatorio e obrigado a servir mesmo se recusando	cidadao brasileiro em estado refratario no servico militar obrigatorio e obrigado a servir mesmo se recusando	['cidadao', 'brasileiro', 'em', 'estado', 'refratario', 'no', 'servico', 'militar', 'obrigatorio', 'e', 'obrigado', 'a', 'servir', 'mesmo', 'se', 'recusando']	cidadao brasileiro em estado refratario no servico militar obrigatorio e obrigado a servir mesmo se recusando	16	O quê	1	16	A pergunta está buscando saber se um cidadão brasileiro é obrigado a executar uma ação específica (servir o serviço militar), mesmo estando em um estado específico (refratário) e manifestando recusa. Portanto, a questão está relacionada à identificação de uma obrigação ou ação a ser executada.		t3_1flk9ou
		t3_1fkz6p8	Você se acha feio(a)?	FALSE			reddit	voce se acha feioa	voce se acha feioa	['voce', 'se', 'acha', 'feioa']	voce se acha feioa	4	Outro	1	4	A pergunta "Você se acha feio(a)?" é uma pergunta que busca saber a autopercepção de alguém em relação à sua aparência. Não se encaixa claramente em nenhuma das categorias fornecidas pois não está pedindo por uma ação, justificativa, responsável, localização, tempo, método ou custo. É uma questão subjetiva sobre a autoimagem, portanto, é classificada como "Outro".		t3_1fkz6p8
		t3_1fl74o7	É errado ficar com alguém pra não ficar entediado?	FALSE			reddit	e errado ficar com alguem pra nao ficar entediado	e errado ficar com alguem pra nao ficar entediado	['e', 'errado', 'ficar', 'com', 'alguem', 'pra', 'nao', 'ficar', 'entediado']	e errado ficar com alguem pra nao ficar entediado	9	Outro	0.888889	8	A pergunta aborda uma questão ética ou moral sobre se é correto ou não envolver-se com alguém por tédio. Não se enquadra diretamente em nenhuma das categorias de ação, motivação, sujeito, localização, cronologia, método ou custo conforme definido. A pergunta é mais filosófica e introspectiva, focando em valores pessoais, e isso não se enquadra nas categorias fornecidas.		t3_1fl74o7
		t3_1fl5q4e	Você é uma pessoa estrategista?	FALSE			reddit	voce e uma pessoa estrategista	voce e uma pessoa estrategista	['voce', 'e', 'uma', 'pessoa', 'estrategista']	voce e uma pessoa estrategista	5	Outro	1	5	A pergunta "Você é uma pessoa estrategista?" não se encaixa em nenhuma das categorias definidas de O quê, Por quê, Quem, Onde, Quando, Como ou Quanto. A pergunta está pedindo uma autoavaliação sobre uma característica pessoal, não solicitando informações sobre ações, motivações, responsáveis, locais, momentos, métodos ou custos.		t3_1fl5q4e
		t3_1fkv7ud	Você trabalharia um dia sim, um dia não?	FALSE			reddit	voce trabalharia um dia sim um dia nao	voce trabalharia um dia sim um dia nao	['voce', 'trabalharia', 'um', 'dia', 'sim', 'um', 'dia', 'nao']	voce trabalharia um dia sim um dia nao	8	Outro	0.75	6	A pergunta é sobre a disposição ou preferência pessoal em relação a um padrão de trabalho específico (um dia sim, um dia não), mas ela não se encaixa claramente em nenhuma das categorias fornecidas, como ação a ser executada (O quê), justificativa (Por quê), pessoa responsável (Quem), localização (Onde), cronologia (Quando), método (Como) ou custo (Quanto). Portanto, classifica-se como "Outro".		t3_1fkv7ud
		t3_1fkyow1	O q fazer para se auto perdoar?	FALSE			reddit	o q fazer para se auto perdoar	o q fazer para se auto perdoar	['o', 'q', 'fazer', 'para', 'se', 'auto', 'perdoar']	o q fazer para se auto perdoar	7	O quê	1	7	A pergunta "O que fazer para se auto perdoar?" está buscando uma ação ou conjunto de ações a serem tomadas para alcançar o objetivo do auto-perdão. Portanto, se enquadra na categoria "O quê" por tratar-se de uma busca por soluções ou ações recomendadas.		t3_1fkyow1
		t3_1fkzf55	Até que idade você urinava na cama, se é que você fazia isso?	FALSE			reddit	ate que idade voce urinava na cama se e que voce fazia isso	ate que idade voce urinava na cama se e que voce fazia isso	['ate', 'que', 'idade', 'voce', 'urinava', 'na', 'cama', 'se', 'e', 'que', 'voce', 'fazia', 'isso']	ate que idade voce urinava na cama se e que voce fazia isso	13	Quando	0.846154	11	A pergunta busca saber até que idade (um ponto no tempo) a pessoa urinava na cama, focando em uma ordem cronológica ou faixa etária específica.		t3_1fkzf55
		t3_1fkq3z7	Existem chances reais do Japão voltar a crescer economicamente e populacionalmente?	FALSE			reddit	existem chances reais do japao voltar a crescer economicamente e populacionalmente	existem chances reais do japao voltar a crescer economicamente e populacionalmente	['existem', 'chances', 'reais', 'do', 'japao', 'voltar', 'a', 'crescer', 'economicamente', 'e', 'populacionalmente']	existem chances reais do japao voltar a crescer economicamente e populacionalmente	11	Outro	1	11	A pergunta busca saber a probabilidade de um evento acontecer no futuro (crescimento econômico e populacional do Japão), mas não se encaixa especificamente em nenhuma das categorias de ação, motivo, responsável, local, tempo, método ou custo. Está mais relacionada a prever cenários futuros ou possibilidades, o que não é coberto pelas categorias fornecidas.		t3_1fkq3z7
		t3_1fl0mve	Posso usar hipoclorito de sódio de verduras na água para beber?	FALSE			reddit	posso usar hipoclorito de sodio de verduras na agua para beber	posso usar hipoclorito de sodio de verduras na agua para beber	['posso', 'usar', 'hipoclorito', 'de', 'sodio', 'de', 'verduras', 'na', 'agua', 'para', 'beber']	posso usar hipoclorito de sodio de verduras na agua para beber	11	Como	0.909091	10	A pergunta busca entender a forma ou método de utilizar hipoclorito de sódio para um propósito específico, que neste caso é a água para beber. Ela questiona a viabilidade ou o procedimento associado ao uso dessa substância nesse contexto. Portanto, enquadra-se na categoria "Como".		t3_1fl0mve
		t3_1fklmy7	Já se sentiram um lixo humano?	FALSE			reddit	ja se sentiram um lixo humano	ja se sentiram um lixo humano	['ja', 'se', 'sentiram', 'um', 'lixo', 'humano']	ja se sentiram um lixo humano	6	Outro	1	6	A pergunta "Já se sentiram um lixo humano?" não se encaixa claramente em nenhuma das categorias listadas. Não busca uma ação (O quê), nem uma justificativa (Por quê), responsável por uma ação (Quem), localização (Onde), cronologia (Quando), método ou estado (Como), ou custo (Quanto). É uma pergunta mais subjetiva em que busca saber sobre experiências pessoais e sentimentos, o que não se enquadra …		t3_1fklmy7
		t3_1fky1ol	Será que Twitter/X volta no Brasil?	FALSE			reddit	sera que twitterx volta no brasil	sera que twitterx volta no brasil	['sera', 'que', 'twitterx', 'volta', 'no', 'brasil']	sera que twitterx volta no brasil	6	Outro	1	6	A pergunta não se encaixa claramente em nenhuma das categorias listadas, pois trata-se de uma especulação sobre a possibilidade de um evento futuro ocorrer, sem especificação de tempo, lugar, ou motivação específica. Ela não está buscando ação, justificativa, nem detalhes de execução ou custo.		t3_1fky1ol
		t3_1fkwcrc	Tem algum sub tipo o Mejulgue q pd adolescente?sera q estou precisando de conselho de redditors 🤨?	FALSE			reddit	tem algum sub tipo o mejulgue q pd adolescentesera q estou precisando de conselho de redditors 🤨	tem algum sub tipo o mejulgue q pd adolescentesera q estou precisando de conselho de redditors 🤨	['tem', 'algum', 'sub', 'tipo', 'o', 'mejulgue', 'q', 'pd', 'adolescentesera', 'q', 'estou', 'precisando', 'de', 'conselho', 'de', 'redditors', '🤨']	tem algum sub tipo o mejulgue q pd adolescentesera q estou precisando de conselho de redditors 🤨	17	O quê	0.882353	15	A pergunta está buscando uma identificação, especificamente de um "sub tipo" como o "Mejulgue", que aparentemente é uma referência a um tipo de conteúdo ou subreddit que ofereça conselhos ou julgamentos de situações pessoais. A pessoa quer saber qual tipo ou nome específico (sub tipo) poderia ser apropriado para adolescentes. Isso se encaixa na categoria O quê, que lida com a identificação de alg…		t3_1fkwcrc
		t3_1fknpcw	tem algum personagem de série ou filme que você odeia sem motivo aparente?	FALSE			reddit	tem algum personagem de serie ou filme que voce odeia sem motivo aparente	tem algum personagem de serie ou filme que voce odeia sem motivo aparente	['tem', 'algum', 'personagem', 'de', 'serie', 'ou', 'filme', 'que', 'voce', 'odeia', 'sem', 'motivo', 'aparente']	tem algum personagem de serie ou filme que voce odeia sem motivo aparente	13	Quem	1	13	A pergunta busca saber sobre um personagem específico de série ou filme que a pessoa não gosta. Por tratar-se de uma identificação de "quem" é o personagem que a pessoa odeia, a classificação adequada é "Quem", pois está indagando sobre a identidade desse personagem.		t3_1fknpcw
		t3_1fkrfje	Estou tentando lembrar de uma música que o clip dela passava na MTv. No clip o cara achava uma jaqueta na rua. Aí ele enfiava a mão no bolso da jaqueta e achava dinheiro. E o dinheiro era infinito no bolso. Aí no fim ele joga a jaqueta fora devido ao caos que o dinheiro trouxe. Alguém lembra?	FALSE			reddit	estou tentando lembrar de uma musica que o clip dela passava na mtv no clip o cara achava uma jaqueta na rua ai ele enfiava a mao no bolso da jaqueta e achava dinheiro e o dinheiro era infinito no bolso ai no fim ele joga a jaqueta fora devido ao caos que o dinheiro trouxe alguem lembra	estou tentando lembrar de uma musica que o clip dela passava na mtv no clip o cara achava uma jaqueta na rua ai ele enfiava a mao no bolso da jaqueta e achava dinheiro e o dinheiro era infinito no bolso ai no fim ele joga a jaqueta fora devido ao caos que o dinheiro trouxe alguem lembra	['estou', 'tentando', 'lembrar', 'de', 'uma', 'musica', 'que', 'o', 'clip', 'dela', 'passava', 'na', 'mtv', 'no', 'clip', 'o', 'cara', 'achava', 'uma', 'jaqueta', 'na', 'rua', 'ai', 'ele', 'enfiava', 'a', 'mao', 'no', 'bolso', 'da', 'jaqueta', 'e', 'achava', 'dinheiro', 'e', 'o', 'dinheiro', 'era', 'infinito', 'no', 'bolso', 'ai', 'no', 'fim', 'ele', 'joga', 'a', 'jaqueta', 'fora', 'devido', 'ao'…	estou tentando lembrar de uma musica que o clip dela passava na mtv no clip o cara achava uma jaqueta na rua ai ele enfiava a mao no bolso da jaqueta e achava dinheiro e o dinheiro era infinito no bolso ai no fim ele joga a jaqueta fora devido ao caos que o dinheiro trouxe alguem lembra	58	O quê	0.655172	38	A pergunta busca identificar uma música específica, descrevendo o vídeo clipe associado a ela. A questão central é a identificação do objeto, neste caso, a música baseada na descrição do clipe. Assim, ela pede por uma ação de reconhecimento ou nomeação da música descrita.		t3_1fkrfje
		t3_1fknapk	Terminar ou nao?	FALSE			reddit	terminar ou nao	terminar ou nao	['terminar', 'ou', 'nao']	terminar ou nao	3	O quê	1	3	A pergunta "Terminar ou nao?" busca uma ação a ser executada (terminar ou não), caindo assim na categoria "O quê". A questão central refere-se a decisão ou identificação de uma ação específica a ser tomada.		t3_1fknapk
		t3_1fknnk9	Pessoal que trabalha, já pagaram almoço pro chefe?	FALSE			reddit	pessoal que trabalha ja pagaram almoco pro chefe	pessoal que trabalha ja pagaram almoco pro chefe	['pessoal', 'que', 'trabalha', 'ja', 'pagaram', 'almoco', 'pro', 'chefe']	pessoal que trabalha ja pagaram almoco pro chefe	8	Quem	1	8	A pergunta busca identificar se o grupo, referido como "pessoal que trabalha", realizou a ação de pagar o almoço para o chefe. Ela está interessada em saber quem, dentro desse grupo, executou a ação mencionada.		t3_1fknnk9
		t3_1fknxdf	Você já aprendeu a lidar com as pessoas?	FALSE			reddit	voce ja aprendeu a lidar com as pessoas	voce ja aprendeu a lidar com as pessoas	['voce', 'ja', 'aprendeu', 'a', 'lidar', 'com', 'as', 'pessoas']	voce ja aprendeu a lidar com as pessoas	8	Como	1	8	A pergunta "Você já aprendeu a lidar com as pessoas?" está inquirindo sobre o método, abordagem ou processo pelo qual alguém aprendeu a interagir com outras pessoas, que é uma questão sobre como aconteceu ou é realizada essa aprendizagem. Portanto, ela se encaixa na categoria "Como" porque está relacionada à maneira como algo (neste caso, lidar com pessoas) foi alcançado ou aprendido.		t3_1fknxdf
		t3_1fk4v05	Uma verdade que ninguém aceita?	FALSE			reddit	uma verdade que ninguem aceita	uma verdade que ninguem aceita	['uma', 'verdade', 'que', 'ninguem', 'aceita']	uma verdade que ninguem aceita	5	Outro	1	5	A pergunta "Uma verdade que ninguém aceita?" não se encaixa claramente em nenhuma das categorias fornecidas, pois não busca uma ação específica, justificativa, responsável, lugar, momento, método ou custo. É uma pergunta mais aberta e filosófica que não se alinha com as categorias de classificação disponíveis.		t3_1fk4v05
		t3_1fkp3px	Já sentiram a necessidade constante de apagar as redes sociais e desativar as notificações do WhatsApp?	FALSE			reddit	ja sentiram a necessidade constante de apagar as redes sociais e desativar as notificacoes do whatsapp	ja sentiram a necessidade constante de apagar as redes sociais e desativar as notificacoes do whatsapp	['ja', 'sentiram', 'a', 'necessidade', 'constante', 'de', 'apagar', 'as', 'redes', 'sociais', 'e', 'desativar', 'as', 'notificacoes', 'do', 'whatsapp']	ja sentiram a necessidade constante de apagar as redes sociais e desativar as notificacoes do whatsapp	16	Outro	0.9375	15	A pergunta trata de uma experiência pessoal subjetiva relacionada à sensação de sobrecarga com redes sociais e aplicativos, não buscando diretamente uma ação, justificação, responsável, local, momento, método ou custo. Assim, não se encaixa claramente em nenhuma das categorias específicas fornecidas.		t3_1fkp3px
		t3_1fkm8h4	Vale a pena fazer ciências econômicas?	FALSE			reddit	vale a pena fazer ciencias economicas	vale a pena fazer ciencias economicas	['vale', 'a', 'pena', 'fazer', 'ciencias', 'economicas']	vale a pena fazer ciencias economicas	6	Por quê	1	6	A pergunta "Vale a pena fazer ciências econômicas?" busca entender a justificativa ou motivação para se dedicar a essa área de estudo, questionando os motivos ou os benefícios que justificarão essa escolha. Está, portanto, em busca de uma razão subjacente para a decisão, o que se alinha com as características das perguntas classificadas como "Por quê".		t3_1fkm8h4
		t3_1fkmdtn	Na tua opinião, ainda encontraremos as pessoas que amamos que morreram um dia?	FALSE			reddit	na tua opiniao ainda encontraremos as pessoas que amamos que morreram um dia	na tua opiniao ainda encontraremos as pessoas que amamos que morreram um dia	['na', 'tua', 'opiniao', 'ainda', 'encontraremos', 'as', 'pessoas', 'que', 'amamos', 'que', 'morreram', 'um', 'dia']	na tua opiniao ainda encontraremos as pessoas que amamos que morreram um dia	13	Outro	0.923077	12	A pergunta "Ainda encontraremos as pessoas que amamos que morreram um dia?" não se encaixa claramente em nenhuma das categorias definidas. Ela aborda uma questão filosófica ou espiritual sobre a possibilidade de reencontrar entes queridos após a morte, algo que não se enquadra em "o quê", "por quê", "quem", "onde", "quando", "como" ou "quanto", pois não busca informações específicas sobre ações, …		t3_1fkmdtn
		t3_1fkjc5e	Você usa a mesma roupa por alguns dias seguidos?	FALSE			reddit	voce usa a mesma roupa por alguns dias seguidos	voce usa a mesma roupa por alguns dias seguidos	['voce', 'usa', 'a', 'mesma', 'roupa', 'por', 'alguns', 'dias', 'seguidos']	voce usa a mesma roupa por alguns dias seguidos	9	Outro	1	9	A pergunta "Você usa a mesma roupa por alguns dias seguidos?" não se encaixa claramente em nenhuma das categorias especificadas. Não busca ação a ser executada, justificativa, identificação de responsável, localização, cronologia, modo de execução, ou custo. É uma pergunta sobre comportamento pessoal que não se enquadra nas categorias disponíveis.		t3_1fkjc5e
		t3_1fk9d1n	Oq acham de pais que ficam nus ou de cueca na frente de seus filhos homens?	FALSE			reddit	oq acham de pais que ficam nus ou de cueca na frente de seus filhos homens	oq acham de pais que ficam nus ou de cueca na frente de seus filhos homens	['oq', 'acham', 'de', 'pais', 'que', 'ficam', 'nus', 'ou', 'de', 'cueca', 'na', 'frente', 'de', 'seus', 'filhos', 'homens']	oq acham de pais que ficam nus ou de cueca na frente de seus filhos homens	16	O quê	0.875	14	A pergunta está pedindo uma opinião sobre uma situação específica envolvendo pais e filhos, que poderia ser entendida como buscar a identificação de uma ação (pais ficarem nus ou de cueca) e qual a percepção sobre isso. Portanto, se enquadra na categoria "O quê", que lida com identificação de ações ou algo a ser considerado.		t3_1fk9d1n
		t3_1fk0z5w	Ja conviveu com um gênio ou pessoa com cognição acima da média? São ignorantes ou engraçados?	FALSE			reddit	ja conviveu com um genio ou pessoa com cognicao acima da media sao ignorantes ou engracados	ja conviveu com um genio ou pessoa com cognicao acima da media sao ignorantes ou engracados	['ja', 'conviveu', 'com', 'um', 'genio', 'ou', 'pessoa', 'com', 'cognicao', 'acima', 'da', 'media', 'sao', 'ignorantes', 'ou', 'engracados']	ja conviveu com um genio ou pessoa com cognicao acima da media sao ignorantes ou engracados	16	Quem	0.875	14	A pergunta busca identificar quem são as pessoas consideradas gênios ou com cognição acima da média. Além disso, questiona sobre características relacionadas a essas pessoas (se são ignorantes ou engraçados), o que focaliza na relação com quem se está convivendo.		t3_1fk0z5w
		t3_1fjzo07	Usar Ç nas senhas é uma proteção adicional contra hackers?	FALSE			reddit	usar c nas senhas e uma protecao adicional contra hackers	usar c nas senhas e uma protecao adicional contra hackers	['usar', 'c', 'nas', 'senhas', 'e', 'uma', 'protecao', 'adicional', 'contra', 'hackers']	usar c nas senhas e uma protecao adicional contra hackers	10	Como	1	10	A pergunta está em busca de entender como o uso do caractere "Ç" em senhas pode afetar a proteção contra hackers, ou seja, está interessada em saber de que maneira essa prática atua como uma proteção adicional. Isso se alinha à categoria de perguntas que buscam compreender o método ou o estado de algo.		t3_1fjzo07
		t3_1fk8y68	Cedulas antigas, consigo ganhar algum dinheiro?	FALSE			reddit	cedulas antigas consigo ganhar algum dinheiro	cedulas antigas consigo ganhar algum dinheiro	['cedulas', 'antigas', 'consigo', 'ganhar', 'algum', 'dinheiro']	cedulas antigas consigo ganhar algum dinheiro	6	O quê	1	6	A pergunta "Cédulas antigas, consigo ganhar algum dinheiro?" busca identificar a possibilidade de uma ação ou resultado específico (ganhar dinheiro) quando se tem cédulas antigas. A questão se concentra em saber se existe um valor ou oportunidade associada às cédulas antigas, o que se alinha com a categoria "O quê", pois envolve um potencial problema a ser solucionado ou ação a ser tomada em rela…		t3_1fk8y68
		t3_1fk8tgo	Vcs fizeram pos graduação?	FALSE			reddit	vcs fizeram pos graduacao	vcs fizeram pos graduacao	['vcs', 'fizeram', 'pos', 'graduacao']	vcs fizeram pos graduacao	4	Quem	1	4	A pergunta "Vcs fizeram pos graduação?" busca identificar quem, entre o grupo ao qual a pergunta é dirigida, realizou a ação de fazer uma pós-graduação. A intenção é saber quais indivíduos específicos completaram esse nível educacional, tornando a pergunta relacionada à categoria "Quem".		t3_1fk8tgo
		t3_1fjutmx	Alguém já usou o app "boo"?	FALSE			reddit	alguem ja usou o app boo	alguem ja usou o app boo	['alguem', 'ja', 'usou', 'o', 'app', 'boo']	alguem ja usou o app boo	6	Quem	1	6	A pergunta "Alguém já usou o app 'boo'?" está buscando informações sobre as pessoas que já utilizaram o aplicativo, ou seja, indaga sobre quem realizou a ação de usar o aplicativo "boo".		t3_1fjutmx
		t3_1fk7xwj	E normal ter a letra feia?	FALSE			reddit	e normal ter a letra feia	e normal ter a letra feia	['e', 'normal', 'ter', 'a', 'letra', 'feia']	e normal ter a letra feia	6	Outro	1	6	A pergunta "É normal ter a letra feia?" está buscando uma avaliação sobre normalidade ou aceitabilidade de um fato, mas não se enquadra diretamente em nenhuma das categorias especificadas, como ações, justificativas, lugares, tempo, métodos ou custos. Portanto, classifiquei como "Outro".		t3_1fk7xwj
		t3_1fjy1os	Vc realmente fica feliz com um elogio ou é uma coisa indiferente?	FALSE			reddit	vc realmente fica feliz com um elogio ou e uma coisa indiferente	vc realmente fica feliz com um elogio ou e uma coisa indiferente	['vc', 'realmente', 'fica', 'feliz', 'com', 'um', 'elogio', 'ou', 'e', 'uma', 'coisa', 'indiferente']	vc realmente fica feliz com um elogio ou e uma coisa indiferente	12	Outro	1	12	A pergunta questiona a reação emocional de uma pessoa ao receber um elogio, indagando se isso causa felicidade ou indiferença. Esta não é uma pergunta que busca uma ação a ser realizada, justificativa, responsável, localização, cronologia, métodos ou custos. Em vez disso, está explorando uma experiência emocional subjetiva, que não se encaixa em nenhuma das categorias fornecidas.		t3_1fjy1os
		t3_1fk543s	Ainda vale a pena investir em bitcoin?	FALSE			reddit	ainda vale a pena investir em bitcoin	ainda vale a pena investir em bitcoin	['ainda', 'vale', 'a', 'pena', 'investir', 'em', 'bitcoin']	ainda vale a pena investir em bitcoin	7	Por quê	1	7	A pergunta "Ainda vale a pena investir em bitcoin?" busca entender a justificativa ou motivo para continuar a investir, ou não, em bitcoin. A questão é sobre a viabilidade e o valor do investimento atualmente, que envolve um raciocínio de "por que seria (ou não seria) vantajoso investir". Assim, a natureza da pergunta está focada em compreender se há razões sólidas para tal decisão no contexto pr…		t3_1fk543s
		t3_1fjxmft	Se apaixonar por melhor amigo de infância pode dar muito certo ou muito errado?	FALSE			reddit	se apaixonar por melhor amigo de infancia pode dar muito certo ou muito errado	se apaixonar por melhor amigo de infancia pode dar muito certo ou muito errado	['se', 'apaixonar', 'por', 'melhor', 'amigo', 'de', 'infancia', 'pode', 'dar', 'muito', 'certo', 'ou', 'muito', 'errado']	se apaixonar por melhor amigo de infancia pode dar muito certo ou muito errado	14	Outro	0.928571	13	A pergunta "Se apaixonar por melhor amigo de infância pode dar muito certo ou muito errado?" trata de uma possibilidade hipotética e os resultados de uma situação pessoal e emocional, que não se enquadra diretamente em nenhuma das categorias baseadas em ações, momentos, pessoas ou informações específicas. As categorias listadas (O quê, Por quê, Quem, Onde, Quando, Como, Quanto) são voltadas mais …		t3_1fjxmft
		t3_1fk3dlm	Ja conseguiu achar alguém do maternal ou pré dps dos 20 anos?	FALSE			reddit	ja conseguiu achar alguem do maternal ou pre dps dos 20 anos	ja conseguiu achar alguem do maternal ou pre dps dos 20 anos	['ja', 'conseguiu', 'achar', 'alguem', 'do', 'maternal', 'ou', 'pre', 'dps', 'dos', '20', 'anos']	ja conseguiu achar alguem do maternal ou pre dps dos 20 anos	12	Quem	1	12	A pergunta refere-se a "achar alguém", o que implica identificar ou reencontrar uma pessoa específica do passado. Assim, está indagando sobre "quem" seria essa pessoa do maternal ou pré-escola que se tentou achar após os 20 anos.		t3_1fk3dlm
		t3_1fk28ts	Você se considera uma pessoa sortuda?	FALSE			reddit	voce se considera uma pessoa sortuda	voce se considera uma pessoa sortuda	['voce', 'se', 'considera', 'uma', 'pessoa', 'sortuda']	voce se considera uma pessoa sortuda	6	Outro	1	6	A pergunta "Você se considera uma pessoa sortuda?" não se enquadra em nenhuma das categorias especificadas. Ela é uma pergunta subjetiva sobre a autopercepção de alguém em relação à sua sorte, não buscando uma ação a ser executada, uma justificativa, um responsável, localização geográfica, um momento no tempo, um método de execução ou um custo. Portanto, a classificação mais adequada para essa pe…		t3_1fk28ts
		t3_1fk86f3	Oque vocês fariam se fossem rejeitados pela menina mais feia que conhecem?	FALSE			reddit	oque voces fariam se fossem rejeitados pela menina mais feia que conhecem	oque voces fariam se fossem rejeitados pela menina mais feia que conhecem	['oque', 'voces', 'fariam', 'se', 'fossem', 'rejeitados', 'pela', 'menina', 'mais', 'feia', 'que', 'conhecem']	oque voces fariam se fossem rejeitados pela menina mais feia que conhecem	12	O quê	1	12	A pergunta questiona sobre a ação que as pessoas tomariam em reação a uma situação hipotética de rejeição. Portanto, está buscando saber qual seria a ação (ou resposta) que os indivíduos executariam. Assim, a categoria "O quê" é a mais apropriada para classificar esta pergunta.		t3_1fk86f3
		t3_1fk1seq	O twitter voltou, já foram lá hoje ?	FALSE			reddit	o twitter voltou ja foram la hoje	o twitter voltou ja foram la hoje	['o', 'twitter', 'voltou', 'ja', 'foram', 'la', 'hoje']	o twitter voltou ja foram la hoje	7	Quando	1	7	A pergunta "O twitter voltou, já foram lá hoje?" está questionando se algo já foi feito em um tempo específico, que é "hoje". A parte "já foram lá hoje?" refere-se ao momento em que a ação de ir ao Twitter foi ou será feita, indicando uma preocupação com a cronologia dos eventos.		t3_1fk1seq
		t3_1fk1biy	Existem profissões(além de professor) que pessoas formadas em letras- inglês pode fazer? O quão dificil é conseguir isso?	FALSE			reddit	existem profissoesalem de professor que pessoas formadas em letras ingles pode fazer o quao dificil e conseguir isso	existem profissoesalem de professor que pessoas formadas em letras ingles pode fazer o quao dificil e conseguir isso	['existem', 'profissoesalem', 'de', 'professor', 'que', 'pessoas', 'formadas', 'em', 'letras', 'ingles', 'pode', 'fazer', 'o', 'quao', 'dificil', 'e', 'conseguir', 'isso']	existem profissoesalem de professor que pessoas formadas em letras ingles pode fazer o quao dificil e conseguir isso	18	O quê	1	18	A pergunta busca identificar quais são as profissões que pessoas formadas em letras - inglês podem exercer além de professor. Trata-se de uma busca por opções de ações ou ocupações possíveis, o que se encaixa na categoria "O quê", pois está pedindo para identificar algo específico relacionado a profissões.		t3_1fk1biy
		t3_1fk0ea8	É melhor comprar um xbox series s ou um ps4?	FALSE			reddit	e melhor comprar um xbox series s ou um ps4	e melhor comprar um xbox series s ou um ps4	['e', 'melhor', 'comprar', 'um', 'xbox', 'series', 's', 'ou', 'um', 'ps4']	e melhor comprar um xbox series s ou um ps4	10	O quê	0.9	9	A pergunta está solicitando uma ação a ser executada, que no caso é a compra de um console de videogame. O foco da pergunta é na escolha entre duas opções (xbox series s ou ps4), e não em entender características como preço (quanto), métodos de compra (como), ou justificativas (por quê). Portanto, ela se encaixa melhor na categoria "O quê", pois busca uma decisão ou identificação entre as opções …		t3_1fk0ea8
		t3_1fjx9s7	Vale a pena trabalhar na Internet fazendo desenhos? Que tipo da lucro?	FALSE			reddit	vale a pena trabalhar na internet fazendo desenhos que tipo da lucro	vale a pena trabalhar na internet fazendo desenhos que tipo da lucro	['vale', 'a', 'pena', 'trabalhar', 'na', 'internet', 'fazendo', 'desenhos', 'que', 'tipo', 'da', 'lucro']	vale a pena trabalhar na internet fazendo desenhos que tipo da lucro	12	Quanto	1	12	A pergunta busca entender o valor financeiro ("quanto") que se pode obter desenhando para a internet, ou seja, está focada no lucro e nos ganhos financeiros potenciais. Portanto, se enquadra na categoria "Quanto" por buscar saber o custo ou benefício financeiro de uma atividade.		t3_1fjx9s7
		t3_1fjd0g2	O mundo realmente está acabando?	FALSE			reddit	o mundo realmente esta acabando	o mundo realmente esta acabando	['o', 'mundo', 'realmente', 'esta', 'acabando']	o mundo realmente esta acabando	5	Outro	1	5	A pergunta "O mundo realmente está acabando?" não se encaixa claramente em nenhuma das categorias especificadas. Ela parece ser uma pergunta retórica ou especulativa, possivelmente buscando uma confirmação ou opinião sobre o estado geral do mundo, mas não busca uma ação, justificativa, cronologia, custo ou método específico, nem é sobre identificação, responsabilidade, localização ou quantidade m…		t3_1fjd0g2
		t3_1fjqasz	Na faculdade de letras, os caras realmente valorizam saber outros idiomas?	FALSE			reddit	na faculdade de letras os caras realmente valorizam saber outros idiomas	na faculdade de letras os caras realmente valorizam saber outros idiomas	['na', 'faculdade', 'de', 'letras', 'os', 'caras', 'realmente', 'valorizam', 'saber', 'outros', 'idiomas']	na faculdade de letras os caras realmente valorizam saber outros idiomas	11	O quê	1	11	A pergunta busca entender se há uma valorização por parte da faculdade por saber outros idiomas, o que está relacionado à identificação de uma ação ou aspecto específico (valorização) no contexto do curso de letras. Assim, ela se encaixa na categoria "O quê", pois questiona sobre uma prática ou reconhecimento dentro da faculdade.		t3_1fjqasz
		t3_1fj7cx0	Sejam sinceros, vcs namorariam um autista?	FALSE			reddit	sejam sinceros vcs namorariam um autista	sejam sinceros vcs namorariam um autista	['sejam', 'sinceros', 'vcs', 'namorariam', 'um', 'autista']	sejam sinceros vcs namorariam um autista	6	Outro	1	6	A pergunta "Sejam sinceros, vcs namorariam um autista?" não se encaixa claramente em nenhuma das categorias definidas (O quê, Por quê, Quem, Onde, Quando, Como, Quanto). A pergunta está relacionada a preferências pessoais e sugestões de conduta em relação a relacionamentos, algo que não pertence a nenhuma das classificações oferecidas.		t3_1fj7cx0
		t3_1fjs72c	Vocês têm ou conhecem alguém q tem medo ou receio de se comunicar através de palavras?	FALSE			reddit	voces tem ou conhecem alguem q tem medo ou receio de se comunicar atraves de palavras	voces tem ou conhecem alguem q tem medo ou receio de se comunicar atraves de palavras	['voces', 'tem', 'ou', 'conhecem', 'alguem', 'q', 'tem', 'medo', 'ou', 'receio', 'de', 'se', 'comunicar', 'atraves', 'de', 'palavras']	voces tem ou conhecem alguem q tem medo ou receio de se comunicar atraves de palavras	16	Quem	0.8125	13	A pergunta está indagando sobre a existência de pessoas que têm medo ou receio de se comunicar através de palavras, ou seja, está buscando identificar quem são essas pessoas.		t3_1fjs72c
		t3_1fj8yjd	Existe "dar um tempo" no relacionamento?	FALSE			reddit	existe dar um tempo no relacionamento	existe dar um tempo no relacionamento	['existe', 'dar', 'um', 'tempo', 'no', 'relacionamento']	existe dar um tempo no relacionamento	6	Outro	1	6	A pergunta questiona a existência do conceito de "dar um tempo" em um relacionamento, o que não se enquadra especificamente em nenhuma das categorias definidas, pois não está buscando uma identificação de ação (O quê), justificativa (Por quê), pessoa (Quem), local (Onde), momento no tempo (Quando), modo de fazer algo (Como) ou quantidade/custo (Quanto). Trata-se mais de uma dúvida conceitual ou f…		t3_1fj8yjd
		t3_1fjk4nh	Vocês já tiveram aquela pessoa que o santo não bate com vocês?	FALSE			reddit	voces ja tiveram aquela pessoa que o santo nao bate com voces	voces ja tiveram aquela pessoa que o santo nao bate com voces	['voces', 'ja', 'tiveram', 'aquela', 'pessoa', 'que', 'o', 'santo', 'nao', 'bate', 'com', 'voces']	voces ja tiveram aquela pessoa que o santo nao bate com voces	12	Outro	0.916667	11	A pergunta não se encaixa claramente em nenhuma das categorias especificadas. Trata-se de uma pergunta pessoal/reflexiva sobre uma experiência individual de antipatia ou falta de compatibilidade com outra pessoa, o que não se alinha a buscar ações, justificativas, pessoas, lugares, tempos, métodos ou custos.		t3_1fjk4nh
		t3_1fjq0ce	Homens, vocês se relacionariam com mulheres que não se depilam?	FALSE			reddit	homens voces se relacionariam com mulheres que nao se depilam	homens voces se relacionariam com mulheres que nao se depilam	['homens', 'voces', 'se', 'relacionariam', 'com', 'mulheres', 'que', 'nao', 'se', 'depilam']	homens voces se relacionariam com mulheres que nao se depilam	10	Outro	0.9	9	A pergunta aborda preferências pessoais e valores subjetivos em relações sociais, que não se enquadram estritamente em nenhuma das categorias fornecidas que são baseadas em ações, justificativas, cronologia, localização, responsabilidade ou custos.		t3_1fjq0ce
		t3_1fjk41a	Vale a pena consagrar a ayahuasca?	FALSE			reddit	vale a pena consagrar a ayahuasca	vale a pena consagrar a ayahuasca	['vale', 'a', 'pena', 'consagrar', 'a', 'ayahuasca']	vale a pena consagrar a ayahuasca	6	Por quê	0.833333	5	A pergunta "Vale a pena consagrar a ayahuasca?" busca saber a justificativa ou motivos (numa perspectiva de valor subjetivo) para se consagrar ou não a ayahuasca, tratando-se de um questionamento sobre a motivação ou objetivo de tal ação.		t3_1fjk41a
		t3_1fjkyiu	Você já largou o dane-se ou ainda tem esperança?	FALSE			reddit	voce ja largou o danese ou ainda tem esperanca	voce ja largou o danese ou ainda tem esperanca	['voce', 'ja', 'largou', 'o', 'danese', 'ou', 'ainda', 'tem', 'esperanca']	voce ja largou o danese ou ainda tem esperanca	9	Outro	1	9	A pergunta "Você já largou o dane-se ou ainda tem esperança?" não se encaixa diretamente em nenhuma das categorias listadas, como "O quê", "Por quê", "Quem", "Onde", "Quando", "Como", ou "Quanto". A pergunta é mais subjetiva e emocional, tratando de sentimentos pessoais e atitudes em relação a uma situação, sem buscar uma informação factual ou específica que se alinhe com as categorias fornecidas.		t3_1fjkyiu
		t3_1fjlo4b	Vocês ficam com alguma mulher apenas por ficar???? Sem envolver desejo, atração ou por achar ela bonita? Só por ficar mesmo sem intuito nenhum?	FALSE			reddit	voces ficam com alguma mulher apenas por ficar sem envolver desejo atracao ou por achar ela bonita so por ficar mesmo sem intuito nenhum	voces ficam com alguma mulher apenas por ficar sem envolver desejo atracao ou por achar ela bonita so por ficar mesmo sem intuito nenhum	['voces', 'ficam', 'com', 'alguma', 'mulher', 'apenas', 'por', 'ficar', 'sem', 'envolver', 'desejo', 'atracao', 'ou', 'por', 'achar', 'ela', 'bonita', 'so', 'por', 'ficar', 'mesmo', 'sem', 'intuito', 'nenhum']	voces ficam com alguma mulher apenas por ficar sem envolver desejo atracao ou por achar ela bonita so por ficar mesmo sem intuito nenhum	24	Outro	0.833333	20	A pergunta é complexa e parece explorar o comportamento emocional e social em relacionamentos, sem buscar uma ação específica, justificativa, responsável, localização, tempo, método ou custo. Ela questiona experiências subjetivas e motivações pessoais ao engajar em relacionamentos casuais sem desejo ou atração, o que não se encaixa adequadamente em nenhuma das categorias fornecidas. Portanto, cla…		t3_1fjlo4b
		t3_1fjewde	Você desistiria de uma graduação no meio do caminho por se perceber péssimo para aquilo?	FALSE			reddit	voce desistiria de uma graduacao no meio do caminho por se perceber pessimo para aquilo	voce desistiria de uma graduacao no meio do caminho por se perceber pessimo para aquilo	['voce', 'desistiria', 'de', 'uma', 'graduacao', 'no', 'meio', 'do', 'caminho', 'por', 'se', 'perceber', 'pessimo', 'para', 'aquilo']	voce desistiria de uma graduacao no meio do caminho por se perceber pessimo para aquilo	15	Outro	1	15	A pergunta não se enquadra diretamente em nenhuma das categorias definidas, pois é uma pergunta reflexiva, solicitando uma opinião ou decisão pessoal em uma situação hipotética. Não busca uma ação concreta, justificação, localização, cronologia, método, custo, nem responsabilidade atribuída a uma terceira parte. Portanto, é classificada como "Outro".		t3_1fjewde
		t3_1fjfwli	Já conseguiu receita controlada(psiquiatria) via teleconsulta?	FALSE			reddit	ja conseguiu receita controladapsiquiatria via teleconsulta	ja conseguiu receita controladapsiquiatria via teleconsulta	['ja', 'conseguiu', 'receita', 'controladapsiquiatria', 'via', 'teleconsulta']	ja conseguiu receita controladapsiquiatria via teleconsulta	6	O quê	1	6	A pergunta está buscando saber se o interlocutor já obteve uma receita controlada através de teleconsulta, portanto, busca identificar uma ação que foi realizada ou não (a obtenção da receita controlada). Essa busca por identificação ou verificação de algo se encaixa na categoria "O quê".		t3_1fjfwli
		t3_1fj3r01	Mais alguém sente que possui dicção boa mas muitas das vezes as pessoas parecem ter dificuldade de te entender?	FALSE			reddit	mais alguem sente que possui diccao boa mas muitas das vezes as pessoas parecem ter dificuldade de te entender	mais alguem sente que possui diccao boa mas muitas das vezes as pessoas parecem ter dificuldade de te entender	['mais', 'alguem', 'sente', 'que', 'possui', 'diccao', 'boa', 'mas', 'muitas', 'das', 'vezes', 'as', 'pessoas', 'parecem', 'ter', 'dificuldade', 'de', 'te', 'entender']	mais alguem sente que possui diccao boa mas muitas das vezes as pessoas parecem ter dificuldade de te entender	19	Outro	1	19	A pergunta expressa uma experiência subjetiva e não busca informações objetivas classificáveis nas categorias O quê, Por quê, Quem, Onde, Quando, Como ou Quanto. Trata-se mais de uma reflexão pessoal ou busca de validação de uma experiência comum, e não de uma busca por informações específicas ou factuais.		t3_1fj3r01
		t3_1fj1982	É normal ser feio para algumas mulheres e bonito para outras?	FALSE			reddit	e normal ser feio para algumas mulheres e bonito para outras	e normal ser feio para algumas mulheres e bonito para outras	['e', 'normal', 'ser', 'feio', 'para', 'algumas', 'mulheres', 'e', 'bonito', 'para', 'outras']	e normal ser feio para algumas mulheres e bonito para outras	11	Outro	0.818182	9	A pergunta trata da subjetividade da percepção de beleza entre diferentes pessoas, o que não se encaixa em nenhuma das categorias definidas (O quê, Por quê, Quem, Onde, Quando, Como, Quanto). A questão aborda o tema de percepção individual e não busca uma ação, justificativa, identificação de pessoa ou lugar, cronologia, método ou custo.		t3_1fj1982
		t3_1fj6nzh	Você teria filhos através de maternidade independente/ paternidade independente/ coparentalidade ?	FALSE			reddit	voce teria filhos atraves de maternidade independente paternidade independente coparentalidade	voce teria filhos atraves de maternidade independente paternidade independente coparentalidade	['voce', 'teria', 'filhos', 'atraves', 'de', 'maternidade', 'independente', 'paternidade', 'independente', 'coparentalidade']	voce teria filhos atraves de maternidade independente paternidade independente coparentalidade	10	Outro	0.9	9	A pergunta feita é de caráter pessoal e opinativo, questionando se alguém aceitaria ter filhos através de determinados métodos (maternidade independente, paternidade independente, coparentalidade). Ela não se enquadra em nenhuma das categorias de perguntas que buscam informações específicas sobre ações, justificativas, localizações, responsáveis, cronologia, métodos ou custos. As opções sugeridas…		t3_1fj6nzh
		t3_1fimuz6	Vocês também não aguentam mais o tanto de gente fazendo pergunta sobre sexo?	FALSE			reddit	voces tambem nao aguentam mais o tanto de gente fazendo pergunta sobre sexo	voces tambem nao aguentam mais o tanto de gente fazendo pergunta sobre sexo	['voces', 'tambem', 'nao', 'aguentam', 'mais', 'o', 'tanto', 'de', 'gente', 'fazendo', 'pergunta', 'sobre', 'sexo']	voces tambem nao aguentam mais o tanto de gente fazendo pergunta sobre sexo	13	Outro	1	13	A pergunta expressa um sentimento de frustração em relação à quantidade de perguntas sobre sexo, mas não busca uma resposta direta que se enquadre em nenhuma das categorias fornecidas. Não está pedindo uma ação, justificativa, identificação de alguém, localização, cronologia, método, ou custo. Portanto, é mais uma expressão de opinião do que uma pergunta dentro das categorias especificadas.		t3_1fimuz6
		t3_1fikjwo	Pq a vida das pessoas parecem tão melhores q a nossa vida?	FALSE			reddit	pq a vida das pessoas parecem tao melhores q a nossa vida	pq a vida das pessoas parecem tao melhores q a nossa vida	['pq', 'a', 'vida', 'das', 'pessoas', 'parecem', 'tao', 'melhores', 'q', 'a', 'nossa', 'vida']	pq a vida das pessoas parecem tao melhores q a nossa vida	12	Por quê	0.833333	10	A pergunta busca a justificativa ou o motivo pelo qual a vida das outras pessoas parece ser melhor do que a nossa. Ela busca entender uma razão ou a causa dessa percepção.		t3_1fikjwo
		t3_1fio9je	Se você pudesse conhecer o exato momento da sua morte, escolheria saber?	FALSE			reddit	se voce pudesse conhecer o exato momento da sua morte escolheria saber	se voce pudesse conhecer o exato momento da sua morte escolheria saber	['se', 'voce', 'pudesse', 'conhecer', 'o', 'exato', 'momento', 'da', 'sua', 'morte', 'escolheria', 'saber']	se voce pudesse conhecer o exato momento da sua morte escolheria saber	12	Quando	1	12	A pergunta está relacionada a saber o "exato momento" da morte, o que se refere a um ponto preciso no tempo ou cronograma, abordando a ideia de saber "quando" algo vai acontecer.		t3_1fio9je
		t3_1fijiga	Você sabe se defender?	FALSE			reddit	voce sabe se defender	voce sabe se defender	['voce', 'sabe', 'se', 'defender']	voce sabe se defender	4	O quê	1	4	A pergunta "Você sabe se defender?" busca saber se a pessoa possui a habilidade ou conhecimento necessário para realizar a ação de defesa. Portanto, está relacionada a identificação de uma ação ou habilidade específica, o que se encaixa na categoria "O quê".		t3_1fijiga
		t3_1fipt5c	Vc tbm tem mania de não relaxar os ombros? "Talvez" pela ansiedade contínua?	FALSE			reddit	vc tbm tem mania de nao relaxar os ombros talvez pela ansiedade continua	vc tbm tem mania de nao relaxar os ombros talvez pela ansiedade continua	['vc', 'tbm', 'tem', 'mania', 'de', 'nao', 'relaxar', 'os', 'ombros', 'talvez', 'pela', 'ansiedade', 'continua']	vc tbm tem mania de nao relaxar os ombros talvez pela ansiedade continua	13	Outro	1	13	A pergunta não se encaixa claramente em nenhuma das categorias fornecidas. Ela parece ser mais uma pergunta retórica ou de sondagem pessoal sobre hábitos e uma possível conexão com ansiedade, não buscando uma ação, motivo, identificação, lugar, tempo, método ou custo específicos.		t3_1fipt5c
		t3_1finkza	Alguém escuta Dominic Fike ?	FALSE			reddit	alguem escuta dominic fike	alguem escuta dominic fike	['alguem', 'escuta', 'dominic', 'fike']	alguem escuta dominic fike	4	Quem	1	4	A pergunta indaga sobre quem escuta Dominic Fike, buscando identificar pessoas que ouvem suas músicas. O foco está em identificar quem realiza a ação de escutar esse artista, encaixando-se na categoria "Quem".		t3_1finkza
		t3_1fioghe	Você que tem grupo de amigos, você é o "líder" desse grupo?	FALSE			reddit	voce que tem grupo de amigos voce e o lider desse grupo	voce que tem grupo de amigos voce e o lider desse grupo	['voce', 'que', 'tem', 'grupo', 'de', 'amigos', 'voce', 'e', 'o', 'lider', 'desse', 'grupo']	voce que tem grupo de amigos voce e o lider desse grupo	12	Quem	0.833333	10	A pergunta está buscando identificar quem é o "líder" dentro do grupo de amigos. Portanto, está relacionada à identificação do responsável ou a pessoa que exerce a liderança, enquadrando-se na categoria "Quem".		t3_1fioghe
		t3_1filgp3	Já conviveram com pessoas extremamente mal educadas? ou simplesmente maldosas?	FALSE			reddit	ja conviveram com pessoas extremamente mal educadas ou simplesmente maldosas	ja conviveram com pessoas extremamente mal educadas ou simplesmente maldosas	['ja', 'conviveram', 'com', 'pessoas', 'extremamente', 'mal', 'educadas', 'ou', 'simplesmente', 'maldosas']	ja conviveram com pessoas extremamente mal educadas ou simplesmente maldosas	10	Outro	1	10	A pergunta não se enquadra em nenhuma das categorias fornecidas, pois se trata de uma pergunta aberta que busca relatar experiências pessoais com pessoas mal educadas ou maldosas. Não busca ação, justificação, identificação de responsável ou culpado, nem informações relacionadas a tempo, local, método ou custo.		t3_1filgp3
		t3_1fi8evs	Tem algum hobby, habilidade ou sonho q vc queria seguir, mas desistiu por se achar muito velho ou incapaz?	FALSE			reddit	tem algum hobby habilidade ou sonho q vc queria seguir mas desistiu por se achar muito velho ou incapaz	tem algum hobby habilidade ou sonho q vc queria seguir mas desistiu por se achar muito velho ou incapaz	['tem', 'algum', 'hobby', 'habilidade', 'ou', 'sonho', 'q', 'vc', 'queria', 'seguir', 'mas', 'desistiu', 'por', 'se', 'achar', 'muito', 'velho', 'ou', 'incapaz']	tem algum hobby habilidade ou sonho q vc queria seguir mas desistiu por se achar muito velho ou incapaz	19	Outro	0.947368	18	A pergunta aborda experiências pessoais relacionadas a hobbies, habilidades ou sonhos abandonados devido à autoavaliação negativa, mas não se enquadra em nenhuma das categorias definidas, pois não busca diretamente informações sobre ações, motivos, pessoas, locais, tempos, métodos ou quantidades. É mais sobre reflexão pessoal e introspecção.		t3_1fi8evs
		t3_1fikfwn	Vocês já fizeram coisas/feitos/conquistas impressionantes ou engraçados em um game na cagada (sem intenção)?	FALSE			reddit	voces ja fizeram coisasfeitosconquistas impressionantes ou engracados em um game na cagada sem intencao	voces ja fizeram coisasfeitosconquistas impressionantes ou engracados em um game na cagada sem intencao	['voces', 'ja', 'fizeram', 'coisasfeitosconquistas', 'impressionantes', 'ou', 'engracados', 'em', 'um', 'game', 'na', 'cagada', 'sem', 'intencao']	voces ja fizeram coisasfeitosconquistas impressionantes ou engracados em um game na cagada sem intencao	14	O quê	1	14	A pergunta busca identificar realizações ou eventos que tiveram um resultado impressionante ou engraçado durante o jogo, mesmo que não fossem intencionais. Isso se encaixa na categoria "O quê", pois está inquirindo sobre as ações ou realizações específicas que foram feitas.		t3_1fikfwn
		t3_1fic1nv	Pessoas que tomaram/tomam ritalina, ajudou muito? Os efeitos colaterais compensaram?	FALSE			reddit	pessoas que tomaramtomam ritalina ajudou muito os efeitos colaterais compensaram	pessoas que tomaramtomam ritalina ajudou muito os efeitos colaterais compensaram	['pessoas', 'que', 'tomaramtomam', 'ritalina', 'ajudou', 'muito', 'os', 'efeitos', 'colaterais', 'compensaram']	pessoas que tomaramtomam ritalina ajudou muito os efeitos colaterais compensaram	10	Como	1	10	A pergunta "Pessoas que tomaram/tomam ritalina, ajudou muito? Os efeitos colaterais compensaram?" está buscando entender como a utilização da Ritalina impactou ou impacta a vida de quem a utiliza, especificamente se houve uma melhora significativa e se os efeitos colaterais foram justificáveis. Portanto, ela se refere a entender o estado ou resultado derivado do uso do medicamento, o que se encai…		t3_1fic1nv
		t3_1fii95l	A lanterna é mesmo um item essencial em um EDC ?	FALSE			reddit	a lanterna e mesmo um item essencial em um edc	a lanterna e mesmo um item essencial em um edc	['a', 'lanterna', 'e', 'mesmo', 'um', 'item', 'essencial', 'em', 'um', 'edc']	a lanterna e mesmo um item essencial em um edc	10	O quê	0.9	9	A pergunta questiona a essencialidade da lanterna, ou seja, está questionando a identificação de algo como essencial ou não dentro de um conjunto específico de itens (EDC - Every Day Carry). Isso se encaixa na categoria "O quê", pois trata sobre a identificação de um objeto e sua importância ou necessidade dentro desse contexto.		t3_1fii95l
		t3_1fihrox	Alguém que você conhece fuma narguile hoje em dia?	FALSE			reddit	alguem que voce conhece fuma narguile hoje em dia	alguem que voce conhece fuma narguile hoje em dia	['alguem', 'que', 'voce', 'conhece', 'fuma', 'narguile', 'hoje', 'em', 'dia']	alguem que voce conhece fuma narguile hoje em dia	9	Quem	1	9	A pergunta está inquirindo acerca de conhecer alguém específico, ou seja, está interessada em saber quem dentro do círculo de conhecimento do interlocutor está praticando a ação de fumar narguile. Portanto, a categoria "Quem" é a mais apropriada.		t3_1fihrox
		t3_1fi2znn	Algum remédio ou produto pra Foliculite?	FALSE			reddit	algum remedio ou produto pra foliculite	algum remedio ou produto pra foliculite	['algum', 'remedio', 'ou', 'produto', 'pra', 'foliculite']	algum remedio ou produto pra foliculite	6	O quê	1	6	A pergunta está buscando a identificação de algum remédio ou produto específico que pode ser utilizado para tratar a Foliculite. Ela se enquadra na categoria "O quê" porque busca uma solução ou recomendação de produtos para um problema apresentado.		t3_1fi2znn
		t3_1fhvmc0	Porque é tão difícil achar pessoas que assistiram breaking bad e bcs?	FALSE			reddit	porque e tao dificil achar pessoas que assistiram breaking bad e bcs	porque e tao dificil achar pessoas que assistiram breaking bad e bcs	['porque', 'e', 'tao', 'dificil', 'achar', 'pessoas', 'que', 'assistiram', 'breaking', 'bad', 'e', 'bcs']	porque e tao dificil achar pessoas que assistiram breaking bad e bcs	12	Por quê	0.916667	11	A pergunta busca uma justificativa para o fato de ser difícil encontrar pessoas que assistiram aos seriados "Breaking Bad" e "Better Call Saul". Está pedindo uma explicação ou motivo por trás dessa dificuldade.		t3_1fhvmc0
		t3_1fhsqo9	Alguém que entenda de seladora a vácuo para me tirar uma dúvida?	FALSE			reddit	alguem que entenda de seladora a vacuo para me tirar uma duvida	alguem que entenda de seladora a vacuo para me tirar uma duvida	['alguem', 'que', 'entenda', 'de', 'seladora', 'a', 'vacuo', 'para', 'me', 'tirar', 'uma', 'duvida']	alguem que entenda de seladora a vacuo para me tirar uma duvida	12	Quem	1	12	A pergunta está buscando uma pessoa específica que tenha conhecimento sobre seladora a vácuo para ajudar com uma dúvida. Portanto, trata-se de uma pergunta sobre quem possui essa habilidade ou conhecimento.		t3_1fhsqo9
		t3_1fhrje7	Compensa servir o exercíto?	FALSE			reddit	compensa servir o exercito	compensa servir o exercito	['compensa', 'servir', 'o', 'exercito']	compensa servir o exercito	4	Por quê	1	4	A pergunta "Compensa servir o exército?" busca uma justificativa ou motivação sobre se é vantajoso ou não servir no exército. A palavra "compensa" está associada a entender se existe uma razão justificativa, um benefício ou uma explicação que torna o serviço no exército uma escolha positiva ou não. Isso se enquadra na categoria "Por quê", que envolve perguntas que buscam justificativas ou motivaç…		t3_1fhrje7
		t3_1fhpyy0	As coisas Realmente eram mais coloridas no Passado ?	FALSE			reddit	as coisas realmente eram mais coloridas no passado	as coisas realmente eram mais coloridas no passado	['as', 'coisas', 'realmente', 'eram', 'mais', 'coloridas', 'no', 'passado']	as coisas realmente eram mais coloridas no passado	8	Outro	1	8	A pergunta busca uma análise ou reflexão sobre a percepção de cor relacionada ao passado, não inferindo uma ação específica, motivação ou justificativa, nem se relaciona a cronologia, localização, custo ou método. Assim, ela não se encaixa claramente em nenhuma das categorias especificadas. A questão parece mais filosófica ou subjetiva do que prática ou factual, o que está fora das categorias for…		t3_1fhpyy0
		t3_1fhnwhw	Ja usaram chat gpt pra algum trabalho ?	FALSE			reddit	ja usaram chat gpt pra algum trabalho	ja usaram chat gpt pra algum trabalho	['ja', 'usaram', 'chat', 'gpt', 'pra', 'algum', 'trabalho']	ja usaram chat gpt pra algum trabalho	7	O quê	1	7	A pergunta busca saber se as pessoas já utilizaram o chat GPT em algum trabalho, ou seja, trata-se de reconhecer um tipo de ação (uso) já realizada com uma ferramenta específica (chat GPT). Assim, enquadra-se na categoria "O quê", que se refere a identificar ações ou atividades realizadas.		t3_1fhnwhw
		t3_1fhnfy7	É estranho não saber nada sobre os Kardashians?	FALSE			reddit	e estranho nao saber nada sobre os kardashians	e estranho nao saber nada sobre os kardashians	['e', 'estranho', 'nao', 'saber', 'nada', 'sobre', 'os', 'kardashians']	e estranho nao saber nada sobre os kardashians	8	Outro	1	8	A pergunta "É estranho não saber nada sobre os Kardashians?" não se encaixa diretamente em nenhuma das categorias predefinidas. Ela parece ser mais uma reflexão ou pedido de opinião sobre algo considerado comum ou normal na sociedade, em vez de procurar uma resposta factual que se encaixe nas categorias de ação, motivo, pessoa, lugar, tempo, método ou custo.		t3_1fhnfy7
		t3_1fhmfe7	Oq fazer para não dar uma vida de bosta aos filhos?	FALSE			reddit	oq fazer para nao dar uma vida de bosta aos filhos	oq fazer para nao dar uma vida de bosta aos filhos	['oq', 'fazer', 'para', 'nao', 'dar', 'uma', 'vida', 'de', 'bosta', 'aos', 'filhos']	oq fazer para nao dar uma vida de bosta aos filhos	11	O quê	1	11	A pergunta "Oq fazer para não dar uma vida de bosta aos filhos?" busca por uma ação ou conjunto de ações a serem executadas para evitar um resultado indesejado, que neste caso é "uma vida de bosta" para os filhos. Portanto, esta pergunta se encaixa na categoria "O quê", pois se refere à busca por soluções ou ações a serem tomadas.		t3_1fhmfe7
		t3_1fhl0qj	Já foi manipulado ou sofreu abuso psicológico dentro de uma igreja?	FALSE			reddit	ja foi manipulado ou sofreu abuso psicologico dentro de uma igreja	ja foi manipulado ou sofreu abuso psicologico dentro de uma igreja	['ja', 'foi', 'manipulado', 'ou', 'sofreu', 'abuso', 'psicologico', 'dentro', 'de', 'uma', 'igreja']	ja foi manipulado ou sofreu abuso psicologico dentro de uma igreja	11	Outro	1	11	A pergunta é formulada de modo a sugerir uma experiência pessoal, questionando se alguém já foi manipulado ou sofreu abuso psicológico em um ambiente religioso. Embora inclua elementos de "quem" experienciou, "onde" isso aconteceu, e "como" isso se deu, a pergunta não está buscando uma resposta direta dentro de qualquer uma das categorias padrão, mas sim um relato pessoal ou experiência subjetiva…		t3_1fhl0qj
		t3_1fhhv0z	Da pra fazer uma casa sem viga ?	FALSE			reddit	da pra fazer uma casa sem viga	da pra fazer uma casa sem viga	['da', 'pra', 'fazer', 'uma', 'casa', 'sem', 'viga']	da pra fazer uma casa sem viga	7	Como	1	7	A pergunta busca entender o método ou possibilidade de construir uma casa sem viga, portanto é uma questão sobre o processo ou modo de construção.		t3_1fhhv0z
		t3_1fhhpoz	Morder o pescoço ou outras partes do corpo com toda a força possível é uma estratégia válida e eficiente para repelir agressão e se defender? Causa algum dano considerável?	FALSE			reddit	morder o pescoco ou outras partes do corpo com toda a forca possivel e uma estrategia valida e eficiente para repelir agressao e se defender causa algum dano consideravel	morder o pescoco ou outras partes do corpo com toda a forca possivel e uma estrategia valida e eficiente para repelir agressao e se defender causa algum dano consideravel	['morder', 'o', 'pescoco', 'ou', 'outras', 'partes', 'do', 'corpo', 'com', 'toda', 'a', 'forca', 'possivel', 'e', 'uma', 'estrategia', 'valida', 'e', 'eficiente', 'para', 'repelir', 'agressao', 'e', 'se', 'defender', 'causa', 'algum', 'dano', 'consideravel']	morder o pescoco ou outras partes do corpo com toda a forca possivel e uma estrategia valida e eficiente para repelir agressao e se defender causa algum dano consideravel	29	O quê	0.931034	27	A pergunta está buscando identificar se a ação específica de morder o pescoço ou outras partes do corpo com toda a força é uma estratégia válida e eficiente para repelir agressão e causar dano considerável, portanto, se enquadra na categoria "O quê", que inclui perguntas que buscam por uma ação a ser executada ou pela identificação de algo.		t3_1fhhpoz
		t3_1fhbn9t	Descobri que a DJI é Chinesa... Que outra empresa grande além de Xiaomi, BYD e Huawei também é chinesa?	FALSE			reddit	descobri que a dji e chinesa que outra empresa grande alem de xiaomi byd e huawei tambem e chinesa	descobri que a dji e chinesa que outra empresa grande alem de xiaomi byd e huawei tambem e chinesa	['descobri', 'que', 'a', 'dji', 'e', 'chinesa', 'que', 'outra', 'empresa', 'grande', 'alem', 'de', 'xiaomi', 'byd', 'e', 'huawei', 'tambem', 'e', 'chinesa']	descobri que a dji e chinesa que outra empresa grande alem de xiaomi byd e huawei tambem e chinesa	19	O quê	0.789474	15	A pergunta solicita a identificação de outras empresas grandes que são chinesas, além daquelas já mencionadas. Portanto, refere-se à identificação e classificação de objetos, neste caso, empresas, enquadrando-se na categoria "O quê".		t3_1fhbn9t
		t3_1fh8ztk	Será que já é ideal começar a usar máscara por causa dessas queimadas/fumaças?	FALSE			reddit	sera que ja e ideal comecar a usar mascara por causa dessas queimadasfumacas	sera que ja e ideal comecar a usar mascara por causa dessas queimadasfumacas	['sera', 'que', 'ja', 'e', 'ideal', 'comecar', 'a', 'usar', 'mascara', 'por', 'causa', 'dessas', 'queimadasfumacas']	sera que ja e ideal comecar a usar mascara por causa dessas queimadasfumacas	13	O quê	1	13	A pergunta está buscando uma ação a ser executada, ou seja, se é necessário começar a usar máscara devido às queimadas/fumaças. Trata-se de saber qual é a ação apropriada a ser tomada em resposta à situação mencionada, o que se enquadra na categoria "O quê".		t3_1fh8ztk
		t3_1fh4r8q	Alguém aqui já trabalhou no McDonald's e pode me dizer se aquele papo do hamburguer de apoio é real? Se sim, ainda funciona ou trocaram o código depois que caiu na net?	FALSE			reddit	alguem aqui ja trabalhou no mcdonalds e pode me dizer se aquele papo do hamburguer de apoio e real se sim ainda funciona ou trocaram o codigo depois que caiu na net	alguem aqui ja trabalhou no mcdonalds e pode me dizer se aquele papo do hamburguer de apoio e real se sim ainda funciona ou trocaram o codigo depois que caiu na net	['alguem', 'aqui', 'ja', 'trabalhou', 'no', 'mcdonalds', 'e', 'pode', 'me', 'dizer', 'se', 'aquele', 'papo', 'do', 'hamburguer', 'de', 'apoio', 'e', 'real', 'se', 'sim', 'ainda', 'funciona', 'ou', 'trocaram', 'o', 'codigo', 'depois', 'que', 'caiu', 'na', 'net']	alguem aqui ja trabalhou no mcdonalds e pode me dizer se aquele papo do hamburguer de apoio e real se sim ainda funciona ou trocaram o codigo depois que caiu na net	32	O quê	0.9375	30	A pergunta busca identificar se o "papo do hamburguer de apoio" no McDonald's é real, ou seja, está questionando a existência e a veracidade de algo específico. Além disso, está querendo saber se o "código" mencionado ainda funciona ou se foi alterado, também buscando a identificação de algo relativo a procedimentos internos do McDonald's. Portanto, a pergunta se enquadra na categoria "O quê", po…		t3_1fh4r8q
		t3_1fh8tpd	Perfume Ou Ampola?	FALSE			reddit	perfume ou ampola	perfume ou ampola	['perfume', 'ou', 'ampola']	perfume ou ampola	3	Outro	1	3	A pergunta "Perfume Ou Ampola?" é ambígua e não se encaixa claramente em nenhuma das categorias fornecidas (O quê, Por quê, Quem, Onde, Quando, Como, Quanto). A pergunta parece estar contrastando dois itens (perfume e ampola), mas não fornece contexto suficiente para determinar se está perguntando sobre identificação, escolha, comparação ou qualquer outra intenção específica. Portanto, é classifi…		t3_1fh8tpd
		t3_1fh1lkf	vocês tem dicas pra alguém que quer sumir de tudo por um tempo?	FALSE			reddit	voces tem dicas pra alguem que quer sumir de tudo por um tempo	voces tem dicas pra alguem que quer sumir de tudo por um tempo	['voces', 'tem', 'dicas', 'pra', 'alguem', 'que', 'quer', 'sumir', 'de', 'tudo', 'por', 'um', 'tempo']	voces tem dicas pra alguem que quer sumir de tudo por um tempo	13	O quê	1	13	A pergunta está em busca de sugestões ou ações a serem tomadas por alguém que deseja se ausentar de tudo por um tempo. A pessoa está pedindo dicas sobre o que fazer para "sumir de tudo", o que se encaixa na categoria "O quê", já que busca identificar ações ou soluções.		t3_1fh1lkf
		t3_1fh189a	Vocês tem medo de tentar ou de não conseguir?	FALSE			reddit	voces tem medo de tentar ou de nao conseguir	voces tem medo de tentar ou de nao conseguir	['voces', 'tem', 'medo', 'de', 'tentar', 'ou', 'de', 'nao', 'conseguir']	voces tem medo de tentar ou de nao conseguir	9	Outro	0.888889	8	A pergunta "Vocês tem medo de tentar ou de não conseguir?" não se encaixa em nenhuma das categorias listadas (O quê, Por quê, Quem, Onde, Quando, Como, Quanto). Trata-se de uma questão mais subjetiva sobre sentimentos ou emoções pessoais, que não busca uma ação, justificativa, identificação de lugar, tempo, método ou custo. Portanto, classifica-se como "Outro".		t3_1fh189a
		t3_1fh02wi	Tem alguém aqui que ja foi muito tímido um dia e agora não é mais?	FALSE			reddit	tem alguem aqui que ja foi muito timido um dia e agora nao e mais	tem alguem aqui que ja foi muito timido um dia e agora nao e mais	['tem', 'alguem', 'aqui', 'que', 'ja', 'foi', 'muito', 'timido', 'um', 'dia', 'e', 'agora', 'nao', 'e', 'mais']	tem alguem aqui que ja foi muito timido um dia e agora nao e mais	15	Quem	0.933333	14	A pergunta está inquirindo sobre uma pessoa ou grupo de pessoas que passaram por uma experiência específica — ser muito tímido e depois deixar de ser, portanto, está identificando "quem" viveu essa situação.		t3_1fh02wi
		t3_1fgy69k	Pessoas que tem comunidades aq no reddit, é difícil administrar uma?	FALSE			reddit	pessoas que tem comunidades aq no reddit e dificil administrar uma	pessoas que tem comunidades aq no reddit e dificil administrar uma	['pessoas', 'que', 'tem', 'comunidades', 'aq', 'no', 'reddit', 'e', 'dificil', 'administrar', 'uma']	pessoas que tem comunidades aq no reddit e dificil administrar uma	11	Como	1	11	A pergunta "é difícil administrar uma?" refere-se a como é o processo ou o método de administrar comunidades no Reddit. Está buscando entender as dificuldades envolvidas na administração, que se relaciona a como algo é feito ou o estado de um processo.		t3_1fgy69k
		t3_1fgwp7i	Existem cidades no Brasil que são isoladas em todos os aspectos? Tipo, têm sua própria maneira de falar, costumes e tradições específicas, etc, que se diferem das grandes cidades!? Poderiam citar exemplos?	FALSE			reddit	existem cidades no brasil que sao isoladas em todos os aspectos tipo tem sua propria maneira de falar costumes e tradicoes especificas etc que se diferem das grandes cidades poderiam citar exemplos	existem cidades no brasil que sao isoladas em todos os aspectos tipo tem sua propria maneira de falar costumes e tradicoes especificas etc que se diferem das grandes cidades poderiam citar exemplos	['existem', 'cidades', 'no', 'brasil', 'que', 'sao', 'isoladas', 'em', 'todos', 'os', 'aspectos', 'tipo', 'tem', 'sua', 'propria', 'maneira', 'de', 'falar', 'costumes', 'e', 'tradicoes', 'especificas', 'etc', 'que', 'se', 'diferem', 'das', 'grandes', 'cidades', 'poderiam', 'citar', 'exemplos']	existem cidades no brasil que sao isoladas em todos os aspectos tipo tem sua propria maneira de falar costumes e tradicoes especificas etc que se diferem das grandes cidades poderiam citar exemplos	32	Onde	0.9375	30	A pergunta busca identificar locais específicos no Brasil onde as cidades são isoladas em todos os aspectos mencionados, como maneira de falar, costumes e tradições. Isso se refere a lugares que têm características distintas das grandes cidades, portanto, está relacionada a uma questão de localização geográfica ou cultural.		t3_1fgwp7i
		t3_1fgwqyz	Existe uma comunidade brasileira que fala sobre roupa e moda?	FALSE			reddit	existe uma comunidade brasileira que fala sobre roupa e moda	existe uma comunidade brasileira que fala sobre roupa e moda	['existe', 'uma', 'comunidade', 'brasileira', 'que', 'fala', 'sobre', 'roupa', 'e', 'moda']	existe uma comunidade brasileira que fala sobre roupa e moda	10	Onde	1	10	A pergunta procura saber se existe uma comunidade brasileira, que é um local, mesmo que seja virtual, onde se fala sobre roupa e moda. Portanto, isso se enquadra na categoria "Onde", pois busca informações sobre a localização (no sentido de existência e acesso) de um grupo ou comunidade.		t3_1fgwqyz
		t3_1fgpvb6	vocês são pessoas ausentes ou presentes em relacionamentos(amizade, namoro, familiar...)?	FALSE			reddit	voces sao pessoas ausentes ou presentes em relacionamentosamizade namoro familiar	voces sao pessoas ausentes ou presentes em relacionamentosamizade namoro familiar	['voces', 'sao', 'pessoas', 'ausentes', 'ou', 'presentes', 'em', 'relacionamentosamizade', 'namoro', 'familiar']	voces sao pessoas ausentes ou presentes em relacionamentosamizade namoro familiar	10	Outro	1	10	A pergunta "vocês são pessoas ausentes ou presentes em relacionamentos (amizade, namoro, familiar...)?" não se enquadra especificamente em nenhuma das categorias fornecidas. Ela é uma pergunta introspectiva e pessoal, solicitando uma autorreflexão sobre o comportamento em relacionamentos, não se referindo a uma ação, motivo, pessoa, local, momento, método ou custo definido. Portanto, ela é catego…		t3_1fgpvb6
		t3_1fgmaxa	Melhor site para cursos EAD?	FALSE			reddit	melhor site para cursos ead	melhor site para cursos ead	['melhor', 'site', 'para', 'cursos', 'ead']	melhor site para cursos ead	5	O quê	1	5	A pergunta "Melhor site para cursos EAD?" está buscando identificar ou indicar um site específico, portanto, está relacionada à identificação de algo ou escolha de um objeto. Assim, a pergunta se encaixa na categoria "O quê" que é utilizada para perguntas que buscam uma identificação ou escolha de objeto ou ação a ser feita.		t3_1fgmaxa
		t3_1fgl97v	Porque o mundo é tão desigual financeiro?	FALSE			reddit	porque o mundo e tao desigual financeiro	porque o mundo e tao desigual financeiro	['porque', 'o', 'mundo', 'e', 'tao', 'desigual', 'financeiro']	porque o mundo e tao desigual financeiro	7	Por quê	1	7	A pergunta busca uma justificativa ou explicação para a desigualdade financeira no mundo, procurando entender a motivação ou as razões subjacentes a esse fenômeno.		t3_1fgl97v
		t3_1fgl8cy	Acreditam que acompanhar política pode nos dar algumas lições boas sobre estratégia no geral?	FALSE			reddit	acreditam que acompanhar politica pode nos dar algumas licoes boas sobre estrategia no geral	acreditam que acompanhar politica pode nos dar algumas licoes boas sobre estrategia no geral	['acreditam', 'que', 'acompanhar', 'politica', 'pode', 'nos', 'dar', 'algumas', 'licoes', 'boas', 'sobre', 'estrategia', 'no', 'geral']	acreditam que acompanhar politica pode nos dar algumas licoes boas sobre estrategia no geral	14	Outro	1	14	A pergunta está mais focada em uma opinião ou crença sobre o valor do acompanhamento da política para aprendizado estratégico e não se enquadra precisamente em nenhuma das categorias estabelecidas, como ação, motivo, responsável, local, tempo, modo ou custo.		t3_1fgl8cy
		t3_1fgkq4z	Que poder você escolheria ter?	FALSE			reddit	que poder voce escolheria ter	que poder voce escolheria ter	['que', 'poder', 'voce', 'escolheria', 'ter']	que poder voce escolheria ter	5	O quê	1	5	A pergunta "Que poder você escolheria ter?" busca a identificação de algo específico, no caso, um poder que a pessoa gostaria de possuir. Isso se alinha com a categoria "O quê", que cobre questões de identificação de objetos ou ações específicas.		t3_1fgkq4z
		t3_1fgl89e	Que problema você está "empurrando com a barriga" atualmente?	FALSE			reddit	que problema voce esta empurrando com a barriga atualmente	que problema voce esta empurrando com a barriga atualmente	['que', 'problema', 'voce', 'esta', 'empurrando', 'com', 'a', 'barriga', 'atualmente']	que problema voce esta empurrando com a barriga atualmente	9	O quê	1	9	A pergunta busca identificar um problema que alguém está adiando ou evitando lidar. Ela inquire sobre a ação (problema sendo ignorado) sem procurar detalhes sobre como, quando, onde ou por que isso está acontecendo. Portanto, a natureza da pergunta é sobre "o quê" está sendo empurrado com a barriga.		t3_1fgl89e
		t3_1fgek0g	Alguém sabe o significado de todos aqueles desenhos egípcios no quarto do Influenciador Toguro?	FALSE			reddit	alguem sabe o significado de todos aqueles desenhos egipcios no quarto do influenciador toguro	alguem sabe o significado de todos aqueles desenhos egipcios no quarto do influenciador toguro	['alguem', 'sabe', 'o', 'significado', 'de', 'todos', 'aqueles', 'desenhos', 'egipcios', 'no', 'quarto', 'do', 'influenciador', 'toguro']	alguem sabe o significado de todos aqueles desenhos egipcios no quarto do influenciador toguro	14	O quê	1	14	A pergunta busca identificar ou explicar o significado específico de algo, neste caso, dos desenhos egípcios no quarto de um influenciador. A ênfase está na identificação ou no entendimento do conteúdo dos desenhos.		t3_1fgek0g
		t3_1fgdwpf	Se você pudesse, preferia viver num país que tem muitos desastres naturais, mas que seria seguro ou num país violento, mas com zero desastres naturais?	FALSE			reddit	se voce pudesse preferia viver num pais que tem muitos desastres naturais mas que seria seguro ou num pais violento mas com zero desastres naturais	se voce pudesse preferia viver num pais que tem muitos desastres naturais mas que seria seguro ou num pais violento mas com zero desastres naturais	['se', 'voce', 'pudesse', 'preferia', 'viver', 'num', 'pais', 'que', 'tem', 'muitos', 'desastres', 'naturais', 'mas', 'que', 'seria', 'seguro', 'ou', 'num', 'pais', 'violento', 'mas', 'com', 'zero', 'desastres', 'naturais']	se voce pudesse preferia viver num pais que tem muitos desastres naturais mas que seria seguro ou num pais violento mas com zero desastres naturais	25	Outro	0.76	19	A pergunta apresentada é hipotética e envolve uma escolha pessoal entre duas situações distintas, sem buscar informações que se enquadrem em uma das categorias específicas como ação, justificativa, responsável, local, tempo, método ou custo. Portanto, não se encaixa em nenhuma das categorias específicas fornecidas.		t3_1fgdwpf
		t3_1fgbbyr	Acabei de ver uma oferenda na praça que consistia em carne crua/pedaços e um limão partido ao meio em cima de uma folha, alguém sabe pra que é isso? Prosperidade? Amarração?	FALSE			reddit	acabei de ver uma oferenda na praca que consistia em carne cruapedacos e um limao partido ao meio em cima de uma folha alguem sabe pra que e isso prosperidade amarracao	acabei de ver uma oferenda na praca que consistia em carne cruapedacos e um limao partido ao meio em cima de uma folha alguem sabe pra que e isso prosperidade amarracao	['acabei', 'de', 'ver', 'uma', 'oferenda', 'na', 'praca', 'que', 'consistia', 'em', 'carne', 'cruapedacos', 'e', 'um', 'limao', 'partido', 'ao', 'meio', 'em', 'cima', 'de', 'uma', 'folha', 'alguem', 'sabe', 'pra', 'que', 'e', 'isso', 'prosperidade', 'amarracao']	acabei de ver uma oferenda na praca que consistia em carne cruapedacos e um limao partido ao meio em cima de uma folha alguem sabe pra que e isso prosperidade amarracao	31	O quê	0.83871	26	A pergunta está buscando uma identificação ou explicação sobre o que representa a oferenda vista na praça, qual o seu propósito ou intenção, se é relacionada a prosperidade, amarração, etc., o que se encaixa na categoria "O quê".		t3_1fgbbyr
		t3_1fgb0z2	Vc está em quantas redes sociais? vc usa todas no dia dia?	FALSE			reddit	vc esta em quantas redes sociais vc usa todas no dia dia	vc esta em quantas redes sociais vc usa todas no dia dia	['vc', 'esta', 'em', 'quantas', 'redes', 'sociais', 'vc', 'usa', 'todas', 'no', 'dia', 'dia']	vc esta em quantas redes sociais vc usa todas no dia dia	12	Quanto	0.833333	10	A pergunta "Vc está em quantas redes sociais?" refere-se à quantidade de redes sociais em que a pessoa está presente, envolvendo uma medida numérica. Portanto, está relacionada com a categoria "Quanto". Já a segunda parte da pergunta, "vc usa todas no dia a dia?" está buscando saber sobre o uso regular das redes sociais, mas como a primeira parte da pergunta é predominantemente sobre quantidade, …		t3_1fgb0z2
		t3_1fgaqh5	A sintonia e conexão de duas pessoas no mundo digital pode ser diferente no mundo físico? Pq vc acha isso?	FALSE			reddit	a sintonia e conexao de duas pessoas no mundo digital pode ser diferente no mundo fisico pq vc acha isso	a sintonia e conexao de duas pessoas no mundo digital pode ser diferente no mundo fisico pq vc acha isso	['a', 'sintonia', 'e', 'conexao', 'de', 'duas', 'pessoas', 'no', 'mundo', 'digital', 'pode', 'ser', 'diferente', 'no', 'mundo', 'fisico', 'pq', 'vc', 'acha', 'isso']	a sintonia e conexao de duas pessoas no mundo digital pode ser diferente no mundo fisico pq vc acha isso	20	Por quê	0.9	18	A pergunta busca uma explicação ou justificativa para a diferença de sintonia e conexão entre duas pessoas no mundo digital em comparação ao mundo físico. O questionamento "Pq vc acha isso?" explicitamente solicita uma razão ou motivação por trás dessa diferença percebida.		t3_1fgaqh5
		t3_1fg9led	Você é do tipo de pessoa que se apega fácil às outras pessoas ou é desapegado? Não só sobre namoro/ficar, em geral mesmo?	FALSE			reddit	voce e do tipo de pessoa que se apega facil as outras pessoas ou e desapegado nao so sobre namoroficar em geral mesmo	voce e do tipo de pessoa que se apega facil as outras pessoas ou e desapegado nao so sobre namoroficar em geral mesmo	['voce', 'e', 'do', 'tipo', 'de', 'pessoa', 'que', 'se', 'apega', 'facil', 'as', 'outras', 'pessoas', 'ou', 'e', 'desapegado', 'nao', 'so', 'sobre', 'namoroficar', 'em', 'geral', 'mesmo']	voce e do tipo de pessoa que se apega facil as outras pessoas ou e desapegado nao so sobre namoroficar em geral mesmo	23	Outro	0.956522	22	A pergunta está buscando conhecer um traço de personalidade e comportamento da pessoa sobre apego e desapego, algo que não se enquadra diretamente em nenhuma das categorias fornecidas, como ações, justificativas, responsabilidades, locais, temporalidade, métodos ou custos. Portanto, não é possível classificá-la em nenhuma das categorias específicas mencionadas.		t3_1fg9led
		t3_1fg3n4o	E normal ser chamado de garoto tendo 20 anos de idade?	FALSE			reddit	e normal ser chamado de garoto tendo 20 anos de idade	e normal ser chamado de garoto tendo 20 anos de idade	['e', 'normal', 'ser', 'chamado', 'de', 'garoto', 'tendo', '20', 'anos', 'de', 'idade']	e normal ser chamado de garoto tendo 20 anos de idade	11	Outro	0.909091	10	A pergunta apresentada não se enquadra perfeitamente em nenhuma das categorias definidas. Ela é sobre normas sociais ou percepções ao ser chamado de "garoto" aos 20 anos, o que não envolve uma ação específica, justificativa, tempo, lugar, método, pessoa responsável ou custo mensurável. É mais uma questão de opinião ou percepção social sem uma categoria clara entre as opções dadas.		t3_1fg3n4o
		t3_1fg0r6n	alguém conhece uma comunidade de frases curtas?	FALSE			reddit	alguem conhece uma comunidade de frases curtas	alguem conhece uma comunidade de frases curtas	['alguem', 'conhece', 'uma', 'comunidade', 'de', 'frases', 'curtas']	alguem conhece uma comunidade de frases curtas	7	Onde	1	7	A pergunta "alguém conhece uma comunidade de frases curtas?" está solicitando a indicação de um local ou comunidade específica onde se possa encontrar frases curtas. Portanto, ela se encaixa na categoria "Onde", pois envolve uma busca por um lugar ou grupo específico.		t3_1fg0r6n
		t3_1fg6gaq	Pessoas em geral, vocês preferem meninas bonitas ou engraçadas????	FALSE			reddit	pessoas em geral voces preferem meninas bonitas ou engracadas	pessoas em geral voces preferem meninas bonitas ou engracadas	['pessoas', 'em', 'geral', 'voces', 'preferem', 'meninas', 'bonitas', 'ou', 'engracadas']	pessoas em geral voces preferem meninas bonitas ou engracadas	9	Outro	1	9	A pergunta aborda preferências pessoais em relação a características de meninas, questionando se as pessoas preferem "meninas bonitas" ou "engraçadas". Esta pergunta não se encaixa em nenhuma das categorias listadas como ela não busca identificar uma ação, justificativa, responsável, localização, cronologia, método ou custo. Ao invés disso, trata sobre escolhas pessoais e subjetivas, algo que não…		t3_1fg6gaq
		t3_1fg1vqm	Alternativas ao Suflex - sistema para impressão de etiquetas??	FALSE			reddit	alternativas ao suflex sistema para impressao de etiquetas	alternativas ao suflex sistema para impressao de etiquetas	['alternativas', 'ao', 'suflex', 'sistema', 'para', 'impressao', 'de', 'etiquetas']	alternativas ao suflex sistema para impressao de etiquetas	8	O quê	1	8	A pergunta está buscando alternativas, ou seja, outras opções ou sistemas que possam desempenhar a mesma função que o Suflex para impressão de etiquetas. Isso está relacionado à identificação de opções disponíveis, que se enquadra na categoria "O quê".		t3_1fg1vqm
		t3_1fg0q5w	alguém conhece uma comunidade de frase curtas?	FALSE			reddit	alguem conhece uma comunidade de frase curtas	alguem conhece uma comunidade de frase curtas	['alguem', 'conhece', 'uma', 'comunidade', 'de', 'frase', 'curtas']	alguem conhece uma comunidade de frase curtas	7	Onde	1	7	A pergunta busca um local ou meio (no caso, uma comunidade) específico relacionado a frases curtas. Está solicitando indicação de onde ela pode ser encontrada, o que se alinha com a categoria de "Onde".		t3_1fg0q5w
		t3_1ffw9m4	É normal o celular ficar travando após desativar o Chrome e instalar o DuckDuck Go e o Ópera?	FALSE			reddit	e normal o celular ficar travando apos desativar o chrome e instalar o duckduck go e o opera	e normal o celular ficar travando apos desativar o chrome e instalar o duckduck go e o opera	['e', 'normal', 'o', 'celular', 'ficar', 'travando', 'apos', 'desativar', 'o', 'chrome', 'e', 'instalar', 'o', 'duckduck', 'go', 'e', 'o', 'opera']	e normal o celular ficar travando apos desativar o chrome e instalar o duckduck go e o opera	18	Como	0.722222	13	A pergunta busca compreender o estado de funcionamento do celular (normal ou não) após certas modificações (desativar o Chrome e instalar outros aplicativos). Nesse sentido, a questão se refere a como o telefone se comporta ou funciona após estas ações.		t3_1ffw9m4
		t3_1ffz3te	Doariam sangue pra uma pessoa que vocês odeiam?	FALSE			reddit	doariam sangue pra uma pessoa que voces odeiam	doariam sangue pra uma pessoa que voces odeiam	['doariam', 'sangue', 'pra', 'uma', 'pessoa', 'que', 'voces', 'odeiam']	doariam sangue pra uma pessoa que voces odeiam	8	Outro	1	8	A pergunta é de natureza hipotética e moral. Trata-se de uma questão relativa a valores pessoais e juízos de valor emocional, não se enquadrando em nenhuma das categorias de ação, justificativa, identificação ou informação objetiva listadas como respostas relevantes.		t3_1ffz3te
		t3_1ffymi0	Meninos, vocês preferem meninas inteligentes ou engraçadas?	FALSE			reddit	meninos voces preferem meninas inteligentes ou engracadas	meninos voces preferem meninas inteligentes ou engracadas	['meninos', 'voces', 'preferem', 'meninas', 'inteligentes', 'ou', 'engracadas']	meninos voces preferem meninas inteligentes ou engracadas	7	Outro	1	7	A pergunta "Meninos, vocês preferem meninas inteligentes ou engraçadas?" não se encaixa em nenhuma das categorias dadas. Ela está pedindo uma preferência ou opinião pessoal, o que não corresponde a uma ação (O quê), justificativa (Por quê), pessoa (Quem), local (Onde), momento (Quando), método (Como) ou medida (Quanto). A pergunta busca entender uma preferência pessoal, e não se alinha claramente…		t3_1ffymi0
		t3_1ffvw0r	festa a fantasia ainda é legal ou é tosco?	FALSE			reddit	festa a fantasia ainda e legal ou e tosco	festa a fantasia ainda e legal ou e tosco	['festa', 'a', 'fantasia', 'ainda', 'e', 'legal', 'ou', 'e', 'tosco']	festa a fantasia ainda e legal ou e tosco	9	Outro	0.888889	8	A pergunta "festa a fantasia ainda é legal ou é tosco?" não se encaixa claramente em nenhuma das categorias especificadas. Ela busca a opinião ou percepção das pessoas sobre um tipo específico de evento social (festa a fantasia), questionando se ele ainda é considerado divertido ("legal") ou se passou a ser visto como algo de mau gosto ("tosco"). Isso não se refere a uma ação específica a ser tom…		t3_1ffvw0r
		t3_1fftfy0	Dps que o Star+ foi integrado dentro do Disney+, ele vale mais a pena agora?	FALSE			reddit	dps que o star+ foi integrado dentro do disney+ ele vale mais a pena agora	dps que o star+ foi integrado dentro do disney+ ele vale mais a pena agora	['dps', 'que', 'o', 'star+', 'foi', 'integrado', 'dentro', 'do', 'disney+', 'ele', 'vale', 'mais', 'a', 'pena', 'agora']	dps que o star+ foi integrado dentro do disney+ ele vale mais a pena agora	15	Quanto	1	15	A pergunta está indagando se a integração do Star+ ao Disney+ agora proporciona mais valor, destacando-se um potencial custo-benefício ou avaliação do valor agregado. Isso pode ser interpretado como uma pergunta sobre o custo ou valor, que pode ser financeiro ou em termos de vantagens oferecidas.		t3_1fftfy0
		t3_1ffk088	Vocês estão conseguindo respirar bem?	FALSE			reddit	voces estao conseguindo respirar bem	voces estao conseguindo respirar bem	['voces', 'estao', 'conseguindo', 'respirar', 'bem']	voces estao conseguindo respirar bem	5	Como	1	5	A pergunta indaga sobre o estado físico das pessoas, especificamente se elas estão conseguindo ou não respirar bem. Este tipo de pergunta busca compreender como está o estado de algo, neste caso, a condição de respiração, encaixando-se assim na categoria "Como".		t3_1ffk088
		t3_1ffq22p	Gostarom da nova ferramenta de tradução do reedit?	FALSE			reddit	gostarom da nova ferramenta de traducao do reedit	gostarom da nova ferramenta de traducao do reedit	['gostarom', 'da', 'nova', 'ferramenta', 'de', 'traducao', 'do', 'reedit']	gostarom da nova ferramenta de traducao do reedit	8	Outro	1	8	A pergunta "Gostarom da nova ferramenta de tradução do reedit?" é uma pergunta de opinião, não relacionada diretamente a ação, justificativa, responsabilidade, local, tempo, método ou custo. Portanto, não se enquadra em nenhuma das categorias definidas.		t3_1ffq22p
		t3_1ffjsw4	Você se sente sozinho(a)?	FALSE			reddit	voce se sente sozinhoa	voce se sente sozinhoa	['voce', 'se', 'sente', 'sozinhoa']	voce se sente sozinhoa	4	Outro	1	4	A pergunta "Você se sente sozinho(a)?" está indagando sobre o estado emocional ou sentimento de uma pessoa em relação à solidão. Não se enquadra em nenhuma das oito categorias propostas (O quê, Por quê, Quem, Onde, Quando, Como, Quanto), pois não busca uma ação, justificativa, responsável, localização, cronologia, método, ou custo. Portanto, a categoria mais adequada para essa pergunta é "Outro".		t3_1ffjsw4
		t3_1ffq0y0	Uq Vocês fazem para acalmar uma pessoa extremamente ciumenta?	FALSE			reddit	uq voces fazem para acalmar uma pessoa extremamente ciumenta	uq voces fazem para acalmar uma pessoa extremamente ciumenta	['uq', 'voces', 'fazem', 'para', 'acalmar', 'uma', 'pessoa', 'extremamente', 'ciumenta']	uq voces fazem para acalmar uma pessoa extremamente ciumenta	9	Como	1	9	A pergunta busca saber qual método ou procedimento é utilizado para atingir um determinado fim, que neste caso é acalmar uma pessoa extremamente ciumenta. Isso se enquadra na categoria "Como", pois está relacionada a métodos a serem empregados para alcançar um fim.		t3_1ffq0y0
		t3_1ffj7lt	Vale a pena comprar uma esteira?	FALSE			reddit	vale a pena comprar uma esteira	vale a pena comprar uma esteira	['vale', 'a', 'pena', 'comprar', 'uma', 'esteira']	vale a pena comprar uma esteira	6	O quê	1	6	A pergunta está buscando determinar se a ação de comprar uma esteira é algo que vale a pena, o que se traduz na identificação de uma decisão ou ação a ser executada. Portanto, está ligada à categoria "O quê", que envolve buscar uma ação ou decisão específica.		t3_1ffj7lt
		t3_1ffie1v	Em que momento vc percebeu que as pessoas próximas a vc não se importavam com a sua existência?	FALSE			reddit	em que momento vc percebeu que as pessoas proximas a vc nao se importavam com a sua existencia	em que momento vc percebeu que as pessoas proximas a vc nao se importavam com a sua existencia	['em', 'que', 'momento', 'vc', 'percebeu', 'que', 'as', 'pessoas', 'proximas', 'a', 'vc', 'nao', 'se', 'importavam', 'com', 'a', 'sua', 'existencia']	em que momento vc percebeu que as pessoas proximas a vc nao se importavam com a sua existencia	18	Quando	0.833333	15	A pergunta "Em que momento vc percebeu que as pessoas próximas a vc não se importavam com a sua existência?" busca saber sobre o momento específico (tempo ou evento) em que algo foi percebido. Portanto, está relacionada à categoria temporal “Quando”, pois questiona sobre o contexto ou momento no qual a percepção ocorreu.		t3_1ffie1v
		t3_1ffhapt	Porque sem livre arbítrio, não existe diferença entre submissão e rebelião?	FALSE			reddit	porque sem livre arbitrio nao existe diferenca entre submissao e rebeliao	porque sem livre arbitrio nao existe diferenca entre submissao e rebeliao	['porque', 'sem', 'livre', 'arbitrio', 'nao', 'existe', 'diferenca', 'entre', 'submissao', 'e', 'rebeliao']	porque sem livre arbitrio nao existe diferenca entre submissao e rebeliao	11	Por quê	1	11	A pergunta busca uma justificativa ou explicação para a afirmação de que, sem livre arbítrio, não há diferença entre submissão e rebelião. Ela está pedindo razões ou motivos que sustentam essa ideia, o que se encaixa na categoria "Por quê".		t3_1ffhapt
		t3_1ffg695	pessoas que deixaram a namorada para ficar com a amiga de longa data. valeu a pena?	FALSE			reddit	pessoas que deixaram a namorada para ficar com a amiga de longa data valeu a pena	pessoas que deixaram a namorada para ficar com a amiga de longa data valeu a pena	['pessoas', 'que', 'deixaram', 'a', 'namorada', 'para', 'ficar', 'com', 'a', 'amiga', 'de', 'longa', 'data', 'valeu', 'a', 'pena']	pessoas que deixaram a namorada para ficar com a amiga de longa data valeu a pena	16	Quem	0.875	14	A pergunta está direcionada às pessoas que tomaram uma decisão específica, neste caso, deixar a namorada para ficar com uma amiga de longa data. O foco está nas experiências dessas pessoas, que é uma abordagem típica de perguntas da categoria "Quem", pois busca o perfil de pessoas que vivenciaram essa situação.		t3_1ffg695
		t3_1ffetqq	Vocês se sentem sozinhos regularmente??	FALSE			reddit	voces se sentem sozinhos regularmente	voces se sentem sozinhos regularmente	['voces', 'se', 'sentem', 'sozinhos', 'regularmente']	voces se sentem sozinhos regularmente	5	Outro	1	5	A pergunta "Vocês se sentem sozinhos regularmente?" trata de uma questão pessoal e emocional, perguntando sobre o sentimento de solidão e sua frequência. Esta pergunta não se encaixa nas categorias fornecidas (O quê, Por quê, Quem, Onde, Quando, Como, Quanto), pois elas são voltadas para ações, justificativas, responsáveis, localizações, tempo, métodos e custos. Portanto, é mais adequada ser clas…		t3_1ffetqq
		t3_1fffach	Você pularia 4 anos de sua vida pra frente sem saber se vai morrer em troca de 1 milhão de reais ?	FALSE			reddit	voce pularia 4 anos de sua vida pra frente sem saber se vai morrer em troca de 1 milhao de reais	voce pularia 4 anos de sua vida pra frente sem saber se vai morrer em troca de 1 milhao de reais	['voce', 'pularia', '4', 'anos', 'de', 'sua', 'vida', 'pra', 'frente', 'sem', 'saber', 'se', 'vai', 'morrer', 'em', 'troca', 'de', '1', 'milhao', 'de', 'reais']	voce pularia 4 anos de sua vida pra frente sem saber se vai morrer em troca de 1 milhao de reais	21	Outro	0.904762	19	A pergunta é hipotética e lida com uma escolha pessoal ou dilema ético, em vez de buscar informações específicas sobre uma ação, justificativa, cronologia, localização, quantidade, ou método. Não se encaixa claramente em nenhuma das categorias fornecidas, pois trata de uma situação especulativa sobre vida e segurança financeira.		t3_1fffach
		t3_1ffdlj5	Olá, vocês conhecem uma maneira efetiva de ganhar dinheiro em casa para alguém que só tem o ensino médio e um bom computador?	FALSE			reddit	ola voces conhecem uma maneira efetiva de ganhar dinheiro em casa para alguem que so tem o ensino medio e um bom computador	ola voces conhecem uma maneira efetiva de ganhar dinheiro em casa para alguem que so tem o ensino medio e um bom computador	['ola', 'voces', 'conhecem', 'uma', 'maneira', 'efetiva', 'de', 'ganhar', 'dinheiro', 'em', 'casa', 'para', 'alguem', 'que', 'so', 'tem', 'o', 'ensino', 'medio', 'e', 'um', 'bom', 'computador']	ola voces conhecem uma maneira efetiva de ganhar dinheiro em casa para alguem que so tem o ensino medio e um bom computador	23	Como	1	23	A pergunta busca métodos ou maneiras de alcançar um objetivo específico, que é ganhar dinheiro em casa com as condições apresentadas. Isso se enquadra na categoria "Como", que envolve explicações sobre a forma ou método de realizar algo.		t3_1ffdlj5
		t3_1ffaqti	Já foram vítimas de inveja?	FALSE			reddit	ja foram vitimas de inveja	ja foram vitimas de inveja	['ja', 'foram', 'vitimas', 'de', 'inveja']	ja foram vitimas de inveja	5	Outro	1	5	A pergunta "Já foram vítimas de inveja?" não se enquadra diretamente em nenhuma das categorias fornecidas, que são específicas sobre ações, justificativas, pessoas, lugares, tempos, métodos e custos. A pergunta é mais uma questão pessoal e genérica sobre experiência de vida, sem um objetivo claro de identificação ou busca de informações específicas.		t3_1ffaqti
		t3_1ff9nst	Alguém já realmente foi penalizado por entrar no Twitter?	FALSE			reddit	alguem ja realmente foi penalizado por entrar no twitter	alguem ja realmente foi penalizado por entrar no twitter	['alguem', 'ja', 'realmente', 'foi', 'penalizado', 'por', 'entrar', 'no', 'twitter']	alguem ja realmente foi penalizado por entrar no twitter	9	Quem	1	9	A pergunta busca saber especificamente se alguma pessoa já foi penalizada por entrar no Twitter, ou seja, está interessada em identificar quem já sofreu a penalização.		t3_1ff9nst
		t3_1ffai1i	Porque algumas pessoas dizem que estamos no século da put4ria?	FALSE			reddit	porque algumas pessoas dizem que estamos no seculo da put4ria	porque algumas pessoas dizem que estamos no seculo da put4ria	['porque', 'algumas', 'pessoas', 'dizem', 'que', 'estamos', 'no', 'seculo', 'da', 'put4ria']	porque algumas pessoas dizem que estamos no seculo da put4ria	10	Por quê	1	10	A pergunta busca entender a justificativa ou a razão pela qual algumas pessoas dizem que estamos no "século da put4ria". Ela está pedindo pela motivação ou a lógica por trás de tal afirmação, encaixando-se assim na categoria "Por quê".		t3_1ffai1i
		t3_1ff9vhq	Que produto você comprou recentemente e recomenda muito?	FALSE			reddit	que produto voce comprou recentemente e recomenda muito	que produto voce comprou recentemente e recomenda muito	['que', 'produto', 'voce', 'comprou', 'recentemente', 'e', 'recomenda', 'muito']	que produto voce comprou recentemente e recomenda muito	8	O quê	1	8	A pergunta busca identificar um produto específico que foi comprado recentemente e é recomendado, portanto está relacionada à identificação de um objeto ou item, o que se alinha com a categoria "O quê".		t3_1ff9vhq
		t3_1ff9s7f	Vocês já ganharam em algum sorteio?	FALSE			reddit	voces ja ganharam em algum sorteio	voces ja ganharam em algum sorteio	['voces', 'ja', 'ganharam', 'em', 'algum', 'sorteio']	voces ja ganharam em algum sorteio	6	Outro	1	6	A pergunta busca saber se alguém já teve a experiência de ganhar em um sorteio, mas não se enquadra especificamente em nenhuma das categorias definidas "O quê", "Por quê", "Quem", "Onde", "Quando", "Como" ou "Quanto". Não busca uma ação, nem uma justificativa, responsabilidade, localização, cronologia, método ou quantificação. É mais uma pergunta de sondagem de experiência pessoal.		t3_1ff9s7f
		t3_1ff2g51	Você diria que nasceu com sorte?	FALSE			reddit	voce diria que nasceu com sorte	voce diria que nasceu com sorte	['voce', 'diria', 'que', 'nasceu', 'com', 'sorte']	voce diria que nasceu com sorte	6	Outro	1	6	A pergunta não se encaixa claramente em nenhuma das categorias estabelecidas como "O quê", "Por quê", "Quem", "Onde", "Quando", "Como" ou "Quanto". Ela está mais relacionada com a percepção subjetiva de sorte, que não é um dado objetivo que se encaixa em uma dessas categorias.		t3_1ff2g51
		t3_1ff1g4d	Maneiras criativas de diminuir o consumismo de roupas???	FALSE			reddit	maneiras criativas de diminuir o consumismo de roupas	maneiras criativas de diminuir o consumismo de roupas	['maneiras', 'criativas', 'de', 'diminuir', 'o', 'consumismo', 'de', 'roupas']	maneiras criativas de diminuir o consumismo de roupas	8	Como	0.875	7	A pergunta busca saber sobre métodos ou modos de executar uma ação específica: diminuir o consumismo de roupas. Isso se encaixa na categoria "Como", pois o objetivo é entender as maneiras criativas de alcançar esse fim.		t3_1ff1g4d
		t3_1feqptw	PUC MINAS EAD Sistemas de informação, vale a pena?	FALSE			reddit	puc minas ead sistemas de informacao vale a pena	puc minas ead sistemas de informacao vale a pena	['puc', 'minas', 'ead', 'sistemas', 'de', 'informacao', 'vale', 'a', 'pena']	puc minas ead sistemas de informacao vale a pena	9	Por quê	1	9	A pergunta "PUC MINAS EAD Sistemas de informação, vale a pena?" busca entender se há justificativas ou razões para considerar que o curso mencionado tem valor. "Vale a pena" implica em questionar a motivação ou as vantagens de escolher esse curso, encaixando-se na categoria "Por quê".		t3_1feqptw
		t3_1fes139	na opinião de vcs,se vc lutar com alguem em cima de uma plataforma e derrubar a pessoa da plataforma,significa uma vitoria ou não?	FALSE			reddit	na opiniao de vcsse vc lutar com alguem em cima de uma plataforma e derrubar a pessoa da plataformasignifica uma vitoria ou nao	na opiniao de vcsse vc lutar com alguem em cima de uma plataforma e derrubar a pessoa da plataformasignifica uma vitoria ou nao	['na', 'opiniao', 'de', 'vcsse', 'vc', 'lutar', 'com', 'alguem', 'em', 'cima', 'de', 'uma', 'plataforma', 'e', 'derrubar', 'a', 'pessoa', 'da', 'plataformasignifica', 'uma', 'vitoria', 'ou', 'nao']	na opiniao de vcsse vc lutar com alguem em cima de uma plataforma e derrubar a pessoa da plataformasignifica uma vitoria ou nao	23	Outro	0.913043	21	A pergunta está solicitando uma opinião subjetiva sobre o que constitui uma vitória em um cenário hipotético de luta, que não se enquadra especificamente em uma das categorias de ação, justificativa, responsabilidade, localização, cronologia, método ou custo. A questão é mais filosófica ou opinativa.		t3_1fes139
		t3_1feqm01	Preservativo pele com pele realmente parece pele com pele?	FALSE			reddit	preservativo pele com pele realmente parece pele com pele	preservativo pele com pele realmente parece pele com pele	['preservativo', 'pele', 'com', 'pele', 'realmente', 'parece', 'pele', 'com', 'pele']	preservativo pele com pele realmente parece pele com pele	9	Como	0.555556	5	A pergunta está buscando entender o modo ou a sensação que um preservativo "pele com pele" proporciona, ou seja, está questionando como é a experiência desse produto em comparação à sensação de pele com pele.		t3_1feqm01
		t3_1fepopc	Oque você costuma fazer nos seus dias de folga?	FALSE			reddit	oque voce costuma fazer nos seus dias de folga	oque voce costuma fazer nos seus dias de folga	['oque', 'voce', 'costuma', 'fazer', 'nos', 'seus', 'dias', 'de', 'folga']	oque voce costuma fazer nos seus dias de folga	9	O quê	1	9	A pergunta busca saber quais ações ou atividades são realizadas durante os dias de folga, o que classifica a pergunta na categoria "O quê", pois é uma indagação sobre a identificação de atividades executadas.		t3_1fepopc
		t3_1fur2wj	Estágio/Contrato Individual PJ (Shared Services Intern) é furada?	FALSE			reddit	estagiocontrato individual pj shared services intern e furada	estagiocontrato individual pj shared services intern e furada	['estagiocontrato', 'individual', 'pj', 'shared', 'services', 'intern', 'e', 'furada']	estagiocontrato individual pj shared services intern e furada	8	O quê	1	8	A pergunta busca identificar se um tipo específico de estágio ou contrato (Shared Services Intern) é problemático ou não, ou seja, está solicitando uma identificação ou avaliação desse tipo de programa.		t3_1fur2wj
		t3_1fup7o1	Prosseguir para nova tecnologia ou se especializar na atual??	FALSE			reddit	prosseguir para nova tecnologia ou se especializar na atual	prosseguir para nova tecnologia ou se especializar na atual	['prosseguir', 'para', 'nova', 'tecnologia', 'ou', 'se', 'especializar', 'na', 'atual']	prosseguir para nova tecnologia ou se especializar na atual	9	O quê	1	9	A pergunta busca orientação sobre qual ação deve ser executada: se deve-se prosseguir para uma nova tecnologia ou se especializar na atual. Isso se enquadra na categoria "O quê" por estar relacionado a escolha de uma ação ou caminho a ser seguido.		t3_1fup7o1
		t3_1fuowzz	Devo aceitar a proposta de efetivação?	FALSE			reddit	devo aceitar a proposta de efetivacao	devo aceitar a proposta de efetivacao	['devo', 'aceitar', 'a', 'proposta', 'de', 'efetivacao']	devo aceitar a proposta de efetivacao	6	O quê	1	6	A pergunta "Devo aceitar a proposta de efetivação?" busca uma ação a ser executada, neste caso, se a pessoa deve ou não aceitar a proposta de efetivação. Portanto, se enquadra na categoria "O quê", pois trata-se de identificar qual a ação a ser tomada.		t3_1fuowzz
		t3_1ftxyoz	Vcs gostam de ajudar dev Junior?	FALSE			reddit	vcs gostam de ajudar dev junior	vcs gostam de ajudar dev junior	['vcs', 'gostam', 'de', 'ajudar', 'dev', 'junior']	vcs gostam de ajudar dev junior	6	Outro	1	6	A pergunta questiona a opinião ou preferência pessoal de alguém ("vcs gostam de ajudar dev Junior?"), o que não se enquadra diretamente em nenhuma das categorias estabelecidas que lidam com ações, justificativas, responsáveis, localizações, cronologia, métodos ou custos. Portanto, ela se encaixa melhor em "Outro" por tratar de uma opinião pessoal.		t3_1ftxyoz
		t3_1fu28bk	Devo por no LinkedIn que sou PCD?	FALSE			reddit	devo por no linkedin que sou pcd	devo por no linkedin que sou pcd	['devo', 'por', 'no', 'linkedin', 'que', 'sou', 'pcd']	devo por no linkedin que sou pcd	7	O quê	1	7	A pergunta está buscando uma ação específica a ser executada, ou seja, se a pessoa deve ou não colocar no LinkedIn que é PCD (Pessoa com Deficiência). Trata-se de uma decisão sobre o que fazer no perfil, uma escolha a realizar. Portanto, se encaixa na categoria "O quê".		t3_1fu28bk
		t3_1fu7ftk	Vocês aplicam para vagas por esporte?	FALSE			reddit	voces aplicam para vagas por esporte	voces aplicam para vagas por esporte	['voces', 'aplicam', 'para', 'vagas', 'por', 'esporte']	voces aplicam para vagas por esporte	6	O quê	1	6	A pergunta "Vocês aplicam para vagas por esporte?" está indagando sobre uma ação que as pessoas podem realizar, no caso, a ação de se candidatar para vagas de emprego. A questão foca na motivação ou razão pela qual alguém pode realizar essa ação, que é "por esporte," mas essencialmente está questionando se essa ação específica (aplicar para vagas) é realizada. Assim, é classificada como "O quê" p…		t3_1fu7ftk
		t3_1fuikal	Projeto local com tecnologias mais atuais, ou projeto internacional com tecnologia antiga?	FALSE			reddit	projeto local com tecnologias mais atuais ou projeto internacional com tecnologia antiga	projeto local com tecnologias mais atuais ou projeto internacional com tecnologia antiga	['projeto', 'local', 'com', 'tecnologias', 'mais', 'atuais', 'ou', 'projeto', 'internacional', 'com', 'tecnologia', 'antiga']	projeto local com tecnologias mais atuais ou projeto internacional com tecnologia antiga	12	Outro	0.833333	10	A pergunta apresentada não se enquadra claramente em nenhuma das categorias específicas fornecidas. Ela parece ser uma pergunta comparativa pedindo por uma opinião ou discussão sobre a escolha entre dois tipos de projetos, um com tecnologias mais atuais localmente e outro internacional, mas com tecnologias antigas. Não está solicitando uma ação específica, informação temporal, de localização, mét…		t3_1fuikal
		t3_1fud9ze	Java ou C#?	FALSE			reddit	java ou c	java ou c	['java', 'ou', 'c']	java ou c	3	Outro	1	3	A pergunta "Java ou C#?" é bastante vaga e não necessariamente se encaixa claramente em nenhuma das categorias listadas. Ela parece ser uma pergunta sobre escolha ou preferência entre duas linguagens de programação, mas não especifica uma ação, justificativa, pessoa, localização, tempo, método ou custo específico. Portanto, classifica-se como "Outro".		t3_1fud9ze
		t3_1ftzn4d	Vale a pena esse emprego?	FALSE			reddit	vale a pena esse emprego	vale a pena esse emprego	['vale', 'a', 'pena', 'esse', 'emprego']	vale a pena esse emprego	5	Outro	1	5	A pergunta "Vale a pena esse emprego?" é uma questão subjetiva que depende de múltiplos fatores, como condições pessoais e profissionais. Não se encaixa em nenhuma das categorias específicas como "O quê", "Por quê", "Quem", "Onde", "Quando", "Como" ou "Quanto", pois está buscando uma opinião ou julgamento de valor.		t3_1ftzn4d
		t3_1ftygpd	Amazon SD1 - Vale a pena?	FALSE			reddit	amazon sd1 vale a pena	amazon sd1 vale a pena	['amazon', 'sd1', 'vale', 'a', 'pena']	amazon sd1 vale a pena	5	Por quê	1	5	A pergunta "Amazon SD1 - Vale a pena?" busca uma justificativa ou avaliação sobre se o Amazon SD1 é ou não vantajoso. O questionamento se algo "vale a pena" implica na busca de razões ou motivos para justificar seu uso ou escolha, o que se alinha com a categoria Por quê, que envolve perguntas sobre justificativas e motivações.		t3_1ftygpd
		t3_1ftt8u3	tech lead ou tech recruiter?	FALSE			reddit	tech lead ou tech recruiter	tech lead ou tech recruiter	['tech', 'lead', 'ou', 'tech', 'recruiter']	tech lead ou tech recruiter	5	Outro	0.8	4	A pergunta "tech lead ou tech recruiter?" não fornece contexto suficiente para classificá-la em uma das categorias específicas, pois pode ser interpretada de várias maneiras. Pode estar pedindo uma comparação entre os dois, perguntando sobre uma escolha de carreira ou qualquer outra coisa sem um contexto claro. Portanto, não se encaixa diretamente em nenhum dos tipos específicos de perguntas forn…		t3_1ftt8u3
		t3_1ftoz9q	Posso pedir demissão na primeira semana de trabalho?	FALSE			reddit	posso pedir demissao na primeira semana de trabalho	posso pedir demissao na primeira semana de trabalho	['posso', 'pedir', 'demissao', 'na', 'primeira', 'semana', 'de', 'trabalho']	posso pedir demissao na primeira semana de trabalho	8	O quê	1	8	A pergunta "Posso pedir demissão na primeira semana de trabalho?" está buscando saber se uma ação específica pode ser realizada. A dúvida gira em torno da possibilidade de executar a ação de pedir demissão, caracterizando-a como uma pergunta do tipo "O quê".		t3_1ftoz9q
		t3_1ftp38v	Vale a pena tentar?	FALSE			reddit	vale a pena tentar	vale a pena tentar	['vale', 'a', 'pena', 'tentar']	vale a pena tentar	4	Outro	1	4	A pergunta "Vale a pena tentar?" não se encaixa claramente nas categorias fornecidas, porque não é sobre a identificação de uma ação ou objeto (O quê), não busca justificativas (Por quê), não indaga sobre quem (Quem), não se refere a um local (Onde), não está ligada ao tempo (Quando), não pergunta sobre o método ou estado de algo (Como), e não está relacionada a custo ou quantidade (Quanto). A pe…		t3_1ftp38v
		t3_1ftluxy	Instabilidade total em TI, o sonho de carreira acabou?	FALSE			reddit	instabilidade total em ti o sonho de carreira acabou	instabilidade total em ti o sonho de carreira acabou	['instabilidade', 'total', 'em', 'ti', 'o', 'sonho', 'de', 'carreira', 'acabou']	instabilidade total em ti o sonho de carreira acabou	9	Outro	1	9	A pergunta "Instabilidade total em TI, o sonho de carreira acabou?" não se encaixa nas categorias listadas. Não busca uma ação específica a ser executada (O quê), nem uma justificativa ou motivação (Por quê). Não questiona sobre um responsável ou culpado (Quem), local (Onde), tempo (Quando), método ou estado (Como), ou custo (Quanto). Parece ser uma afirmação retórica ou expressão de uma opinião …		t3_1ftluxy
		t3_1ftlmej	Ja usaram esse gitub para vagas é confiavel?	FALSE			reddit	ja usaram esse gitub para vagas e confiavel	ja usaram esse gitub para vagas e confiavel	['ja', 'usaram', 'esse', 'gitub', 'para', 'vagas', 'e', 'confiavel']	ja usaram esse gitub para vagas e confiavel	8	O quê	1	8	A pergunta está buscando saber sobre a confiabilidade de uma plataforma para obtenção de vagas. O uso do termo "confiável" junto ao uso de "esse gitub para vagas" pede por uma ação implícita referente a verificação ou validação do uso dessa ferramenta específica. Isso se enquadra na categoria "O quê", pois está explorando a identificação da confiabilidade de uma ferramenta para um determinado pro…		t3_1ftlmej
		t3_1ftkvi9	Compensa ser analista de dados?	FALSE			reddit	compensa ser analista de dados	compensa ser analista de dados	['compensa', 'ser', 'analista', 'de', 'dados']	compensa ser analista de dados	5	Por quê	1	5	A pergunta "Compensa ser analista de dados?" busca uma justificativa ou motivação para seguir a carreira de analista de dados. A resposta esperada deve explicar os benefícios, vantagens ou razões pelas quais vale a pena exercer essa profissão, caracterizando-se como uma busca por motivos ou objetivos. Portanto, enquadra-se na categoria "Por quê".		t3_1ftkvi9
		t3_1ftl8qv	Vale a pena trocar meu estágio em estatal por um em Startup?	FALSE			reddit	vale a pena trocar meu estagio em estatal por um em startup	vale a pena trocar meu estagio em estatal por um em startup	['vale', 'a', 'pena', 'trocar', 'meu', 'estagio', 'em', 'estatal', 'por', 'um', 'em', 'startup']	vale a pena trocar meu estagio em estatal por um em startup	12	O quê	0.916667	11	A pergunta está relacionada a uma decisão a ser tomada: trocar ou não o estágio. Ela envolve a escolha de uma ação específica, ou seja, identificar qual é a melhor ação a ser executada (manter ou trocar o estágio). Portanto, se enquadra na categoria "O quê", que é usada para perguntas que buscam uma ação a ser executada.		t3_1ftl8qv
		t3_1ftd4y0	Vocês realmente gostam de programar?	FALSE			reddit	voces realmente gostam de programar	voces realmente gostam de programar	['voces', 'realmente', 'gostam', 'de', 'programar']	voces realmente gostam de programar	5	Outro	1	5	A pergunta "Vocês realmente gostam de programar?" não busca uma ação específica, justificativa, responsável, localização, ordem cronológica, método, ou custo relacionado a algum tema. Em vez disso, está buscando uma opinião ou sentimento pessoal em relação à atividade de programar, que não se encaixa em nenhuma das categorias fornecidas.		t3_1ftd4y0
		t3_1ft4gie	Fui me candidatar a uma vaga no AgiBank pela gupy e pediram meu RG no formulário, isso é normal?	FALSE			reddit	fui me candidatar a uma vaga no agibank pela gupy e pediram meu rg no formulario isso e normal	fui me candidatar a uma vaga no agibank pela gupy e pediram meu rg no formulario isso e normal	['fui', 'me', 'candidatar', 'a', 'uma', 'vaga', 'no', 'agibank', 'pela', 'gupy', 'e', 'pediram', 'meu', 'rg', 'no', 'formulario', 'isso', 'e', 'normal']	fui me candidatar a uma vaga no agibank pela gupy e pediram meu rg no formulario isso e normal	19	Como	0.894737	17	A pergunta está buscando entender se o pedido do RG no formulário é uma prática comum ou normal, ou seja, está em busca de uma explicação sobre a norma ou metodologia empregada no processo de candidatura.		t3_1ft4gie
		t3_1fsvxto	Migrar pra Portugal vale a pena ainda?	FALSE			reddit	migrar pra portugal vale a pena ainda	migrar pra portugal vale a pena ainda	['migrar', 'pra', 'portugal', 'vale', 'a', 'pena', 'ainda']	migrar pra portugal vale a pena ainda	7	Por quê	1	7	A pergunta "Migrar pra Portugal vale a pena ainda?" busca uma justificativa ou motivação sobre a ação de migrar para Portugal, questionando se há benefícios ou razões válidas para fazê-lo. Ela está pedindo uma análise sobre a viabilidade e as vantagens ou desvantagens de tomar essa decisão atualmente.		t3_1fsvxto
		t3_1ft9mbj	Alguém trabalhou na Arthur J. Gallagher ?	FALSE			reddit	alguem trabalhou na arthur j gallagher	alguem trabalhou na arthur j gallagher	['alguem', 'trabalhou', 'na', 'arthur', 'j', 'gallagher']	alguem trabalhou na arthur j gallagher	6	Quem	1	6	A pergunta está buscando saber alguma pessoa que tenha trabalhado na Arthur J. Gallagher, ou seja, está questionando sobre quem já teve essa experiência.		t3_1ft9mbj
		t3_1ft5nsq	Leetcode vale a pena?	FALSE			reddit	leetcode vale a pena	leetcode vale a pena	['leetcode', 'vale', 'a', 'pena']	leetcode vale a pena	4	Por quê	1	4	A pergunta busca uma justificativa ou motivação sobre a utilidade ou vantagem de usar o site LeetCode. Está implícito que a pessoa está se questionando sobre os benefícios ou razões para investir tempo e possivelmente dinheiro no uso do LeetCode.		t3_1ft5nsq
		t3_1ft5jav	(Aws, Azure, GCP) para Eng de Dados?	FALSE			reddit	aws azure gcp para eng de dados	aws azure gcp para eng de dados	['aws', 'azure', 'gcp', 'para', 'eng', 'de', 'dados']	aws azure gcp para eng de dados	7	O quê	1	7	A pergunta parece estar solicitando uma recomendação ou comparação entre AWS, Azure e GCP para Engenharia de Dados. Portanto, se refere à identificação de uma plataforma ou tecnologia adequada, enquadrando-se na categoria "O quê".		t3_1ft5jav
		t3_1fsx2in	Alguém conhece a empresa Meta? (Não é a do Facebook)	FALSE			reddit	alguem conhece a empresa meta nao e a do facebook	alguem conhece a empresa meta nao e a do facebook	['alguem', 'conhece', 'a', 'empresa', 'meta', 'nao', 'e', 'a', 'do', 'facebook']	alguem conhece a empresa meta nao e a do facebook	10	Quem	0.9	9	A pergunta busca identificar ou confirmar a existência de uma entidade específica (no caso, a empresa Meta que não é a do Facebook) e saber se alguém possui conhecimento sobre ela. Isso se alinha com a categoria "Quem", que envolve questões sobre identidade ou reconhecimento de sujeitos ou entidades.		t3_1fsx2in
		t3_1fswzb9	Empresas que ajudam br com vaga na gringa	FALSE			reddit	empresas que ajudam br com vaga na gringa	empresas que ajudam br com vaga na gringa	['empresas', 'que', 'ajudam', 'br', 'com', 'vaga', 'na', 'gringa']	empresas que ajudam br com vaga na gringa	8	Onde	1	8	A pergunta está buscando indicação de empresas, o que sugere a busca por locais que oferecem um serviço específico, neste caso, ajuda para obter vagas internacionais ("na gringa"). Portanto, a categoria mais adequada é "Onde", pois se refere a lugares/organizações que fornecem esse suporte.		t3_1fswzb9
		t3_1fsncqc	Sair do remoto para morar nos EUA?	FALSE			reddit	sair do remoto para morar nos eua	sair do remoto para morar nos eua	['sair', 'do', 'remoto', 'para', 'morar', 'nos', 'eua']	sair do remoto para morar nos eua	7	Onde	1	7	A pergunta aborda a possibilidade de transição de trabalho remoto para morar nos EUA. Embora não esteja formulada como uma pergunta direta, o foco está em considerar a mudança para um local específico, que é morar nos EUA. Isso implica uma questão sobre "onde" residir, trazendo assim o aspecto geográfico como prevalente na intenção do questionamento.		t3_1fsncqc
		t3_1fsv8d6	Continuo meu estagio ?	FALSE			reddit	continuo meu estagio	continuo meu estagio	['continuo', 'meu', 'estagio']	continuo meu estagio	3	O quê	1	3	A pergunta "Continuo meu estágio?" está buscando uma ação a ser executada, que é a decisão sobre continuar ou não o estágio. Portanto, ela se enquadra na categoria "O quê", pois refere-se a uma escolha ou resolução a tomar.		t3_1fsv8d6
		t3_1fsve1r	Você trocaria salário por conhecimento?	FALSE			reddit	voce trocaria salario por conhecimento	voce trocaria salario por conhecimento	['voce', 'trocaria', 'salario', 'por', 'conhecimento']	voce trocaria salario por conhecimento	5	O quê	1	5	A pergunta "Você trocaria salário por conhecimento?" está buscando uma ação específica — a ação de trocar algo. A escolha de trocar salário por conhecimento sugere uma decisão ou ação a ser tomada. Assim, a pergunta se enquadra na categoria "O quê".		t3_1fsve1r
		t3_1fsgeum	Posso monetizar um Saas open source ?	FALSE			reddit	posso monetizar um saas open source	posso monetizar um saas open source	['posso', 'monetizar', 'um', 'saas', 'open', 'source']	posso monetizar um saas open source	6	O quê	1	6	A pergunta está buscando identificar se é possível executar a ação de monetizar um Saas open source, ou seja, está em busca de uma possível ação a ser tomada. Portanto, se enquadra na categoria "O quê", pois se refere à identificação de uma possibilidade de ação.		t3_1fsgeum
		t3_1fsfj1e	Alguém usa WSL?	FALSE			reddit	alguem usa wsl	alguem usa wsl	['alguem', 'usa', 'wsl']	alguem usa wsl	3	Quem	1	3	A pergunta "Alguém usa WSL?" está buscando identificar quem utiliza o Windows Subsystem for Linux (WSL). Ela está tentando saber sobre pessoas ou grupos que fazem uso dessa ferramenta. Isso se encaixa na categoria "Quem" pois o foco é sobre quem está executando a ação de usar o WSL.		t3_1fsfj1e
		t3_1fsbaq3	Estágio com salário de 1200 vale a pena?	FALSE			reddit	estagio com salario de 1200 vale a pena	estagio com salario de 1200 vale a pena	['estagio', 'com', 'salario', 'de', '1200', 'vale', 'a', 'pena']	estagio com salario de 1200 vale a pena	8	Quanto	1	8	A pergunta está questionando o valor financeiro (1200) do salário de um estágio e buscando uma avaliação sobre se esse valor compensa ou não. Assim, ela se enquadra na categoria "Quanto", pois envolve avaliação de custos e benefícios associados ao valor do salário.		t3_1fsbaq3
		t3_1fs8kmh	Dicas para conseguir vaga no exterior com visa?	FALSE			reddit	dicas para conseguir vaga no exterior com visa	dicas para conseguir vaga no exterior com visa	['dicas', 'para', 'conseguir', 'vaga', 'no', 'exterior', 'com', 'visa']	dicas para conseguir vaga no exterior com visa	8	Como	1	8	A pergunta "Dicas para conseguir vaga no exterior com visa?" está buscando métodos ou orientações sobre como uma ação, neste caso "conseguir vaga no exterior com visa", pode ser realizada. Assim, enquadra-se na categoria "Como".		t3_1fs8kmh
		t3_1fs6xwp	existe algum equivalente ao Amplitude mas de graça?	FALSE			reddit	existe algum equivalente ao amplitude mas de graca	existe algum equivalente ao amplitude mas de graca	['existe', 'algum', 'equivalente', 'ao', 'amplitude', 'mas', 'de', 'graca']	existe algum equivalente ao amplitude mas de graca	8	O quê	1	8	A pergunta está buscando a identificação ou sugestão de um software que seja equivalente ao Amplitude, mas que seja gratuito. Trata-se de uma busca por uma alternativa ou por uma ação a ser tomada na escolha de uma ferramenta, portanto, se encaixa na categoria "O quê".		t3_1fs6xwp
		t3_1fs2erg	USP ou uma universidade privada?	FALSE			reddit	usp ou uma universidade privada	usp ou uma universidade privada	['usp', 'ou', 'uma', 'universidade', 'privada']	usp ou uma universidade privada	5	Outro	1	5	A pergunta "USP ou uma universidade privada?" é uma escolha entre duas opções, mas não fornece contexto suficiente para categorizá-la precisamente em uma das categorias como O quê, Por quê, Quem, Onde, Quando, Como ou Quanto. Não busca especificamente uma ação, justificativa, identificação de pessoa responsável, localização, cronologia, método ou quantidade/custo, portanto, encaixa-se na categori…		t3_1fs2erg
		t3_1frvrs2	devs power apps, veem futuro na sua stack?	FALSE			reddit	devs power apps veem futuro na sua stack	devs power apps veem futuro na sua stack	['devs', 'power', 'apps', 'veem', 'futuro', 'na', 'sua', 'stack']	devs power apps veem futuro na sua stack	8	Outro	1	8	A pergunta "devs power apps, veem futuro na sua stack?" não se enquadra diretamente nas categorias fornecidas. Ela está pedindo a opinião ou visão dos desenvolvedores (devs) sobre perspectivas futuras, o que não é uma busca por justificativa (Por quê), ação (O quê), responsável (Quem), localização (Onde), ordem cronológica (Quando), método (Como), ou custo (Quanto). A pergunta está mais relaciona…		t3_1frvrs2
		t3_1fru87r	Será que é possível?	FALSE			reddit	sera que e possivel	sera que e possivel	['sera', 'que', 'e', 'possivel']	sera que e possivel	4	Outro	1	4	A pergunta "Será que é possível?" não fornece informações suficientes para determinar seu contexto ou categoria específica. Não é possível identificar se se refere a uma ação, motivo, pessoa, local, tempo, método ou custo, sem mais contexto ou especificidade sobre o assunto que está sendo questionado. Portanto, ela é classificada como "Outro".		t3_1fru87r
		t3_1frp7ah	Alguém usa V lang, para programar ou vender software ou empresa mesmo?	FALSE			reddit	alguem usa v lang para programar ou vender software ou empresa mesmo	alguem usa v lang para programar ou vender software ou empresa mesmo	['alguem', 'usa', 'v', 'lang', 'para', 'programar', 'ou', 'vender', 'software', 'ou', 'empresa', 'mesmo']	alguem usa v lang para programar ou vender software ou empresa mesmo	12	Outro	0.916667	11	A pergunta busca saber se alguma pessoa utiliza a linguagem de programação V lang, mas não se encaixa claramente nas categorias fornecidas. Não busca uma ação específica a ser realizada (O quê), uma justificativa ou motivação (Por quê), quem é responsável por uma ação (Quem), locais específicos (Onde), temporalidade (Quando), métodos ou estados (Como), nem algum tipo de custo (Quanto). Portanto, …		t3_1frp7ah
		t3_1frohew	CC é melhor que ADS?	FALSE			reddit	cc e melhor que ads	cc e melhor que ads	['cc', 'e', 'melhor', 'que', 'ads']	cc e melhor que ads	5	Outro	1	5	A pergunta "CC é melhor que ADS?" não se enquadra claramente em nenhuma das categorias dadas. Ela está comparando duas entidades (presumivelmente áreas de estudo, como Ciência da Computação e Análise e Desenvolvimento de Sistemas) e perguntando sobre uma avaliação ou opinião sobre qual delas é "melhor". Não se trata diretamente de uma ação, justificativa, pessoa, local, tempo, método ou custo, ma…		t3_1frohew
		t3_1fro8pl	Aceitariam um concurso pra trabalhar em uma câmara municipal com salário bruto de 4900?	FALSE			reddit	aceitariam um concurso pra trabalhar em uma camara municipal com salario bruto de 4900	aceitariam um concurso pra trabalhar em uma camara municipal com salario bruto de 4900	['aceitariam', 'um', 'concurso', 'pra', 'trabalhar', 'em', 'uma', 'camara', 'municipal', 'com', 'salario', 'bruto', 'de', '4900']	aceitariam um concurso pra trabalhar em uma camara municipal com salario bruto de 4900	14	Outro	1	14	A pergunta trata de uma decisão pessoal, que envolve avaliar um convite para trabalhar em uma câmara municipal com um salário específico. Ela combina elementos de avaliação pessoal, emprego e valor do salário, mas não se encaixa diretamente em nenhuma das categorias claramente, já que não busca um dado específico como tempo, local, justificativa ou método, que são os focos das categorias listadas.		t3_1fro8pl
		t3_1frmpgt	Opiniões sinceras sobre o "curso.dev" do Filipe Deschamps?	FALSE			reddit	opinioes sinceras sobre o cursodev do filipe deschamps	opinioes sinceras sobre o cursodev do filipe deschamps	['opinioes', 'sinceras', 'sobre', 'o', 'cursodev', 'do', 'filipe', 'deschamps']	opinioes sinceras sobre o cursodev do filipe deschamps	8	O quê	1	8	A pergunta está buscando a identificação de opiniões e avaliações sobre o "curso.dev" do Filipe Deschamps, o que se relaciona a uma ação de expressar uma opinião ou identificar características do curso. Assim, enquadra-se na categoria "O quê" por estar ligada à identificação e avaliação de algo.		t3_1frmpgt
		t3_1frhy92	Porque as pessoas insistem em dizer que frontend é mais fácil que backend?	FALSE			reddit	porque as pessoas insistem em dizer que frontend e mais facil que backend	porque as pessoas insistem em dizer que frontend e mais facil que backend	['porque', 'as', 'pessoas', 'insistem', 'em', 'dizer', 'que', 'frontend', 'e', 'mais', 'facil', 'que', 'backend']	porque as pessoas insistem em dizer que frontend e mais facil que backend	13	Por quê	0.923077	12	A pergunta busca entender a razão ou justificativa para a percepção de que frontend é considerado mais fácil que backend. A palavra "insistem" sugere a busca por uma explicação sobre o porquê dessa crença ou afirmação ser comum entre as pessoas. Portanto, ela se encaixa na categoria "Por quê", que foca em justificativas e motivações.		t3_1frhy92
		t3_1frct2a	Olá, criei a extensão Easy Logger para controlar logs de aplicações de forma simples. Basta configurar os apps que deseja monitorar, e ela faz o resto. Fácil de usar, controlada pelo localStorage, gerencia: log, info, warn e error no console. No link do github tem um vídeo explicativo.	FALSE			reddit	ola criei a extensao easy logger para controlar logs de aplicacoes de forma simples basta configurar os apps que deseja monitorar e ela faz o resto facil de usar controlada pelo localstorage gerencia log info warn e error no console no link do github tem um video explicativo	ola criei a extensao easy logger para controlar logs de aplicacoes de forma simples basta configurar os apps que deseja monitorar e ela faz o resto facil de usar controlada pelo localstorage gerencia log info warn e error no console no link do github tem um video explicativo	['ola', 'criei', 'a', 'extensao', 'easy', 'logger', 'para', 'controlar', 'logs', 'de', 'aplicacoes', 'de', 'forma', 'simples', 'basta', 'configurar', 'os', 'apps', 'que', 'deseja', 'monitorar', 'e', 'ela', 'faz', 'o', 'resto', 'facil', 'de', 'usar', 'controlada', 'pelo', 'localstorage', 'gerencia', 'log', 'info', 'warn', 'e', 'error', 'no', 'console', 'no', 'link', 'do', 'github', 'tem', 'um', 'v…	ola criei a extensao easy logger para controlar logs de aplicacoes de forma simples basta configurar os apps que deseja monitorar e ela faz o resto facil de usar controlada pelo localstorage gerencia log info warn e error no console no link do github tem um video explicativo	48	Outro	0.916667	44	A mensagem fornecida não se configura como uma pergunta. É uma declaração informativa sobre a criação e funcionalidades de uma extensão chamada Easy Logger. Não há uma solicitação de informação explícita ou implícita, daí não se enquadrar em nenhuma das categorias de perguntas oferecidas.		t3_1frct2a
		t3_1fr272h	Terminar faculdade rápido ou ganhar bem?	FALSE			reddit	terminar faculdade rapido ou ganhar bem	terminar faculdade rapido ou ganhar bem	['terminar', 'faculdade', 'rapido', 'ou', 'ganhar', 'bem']	terminar faculdade rapido ou ganhar bem	6	Outro	1	6	A pergunta "Terminar faculdade rápido ou ganhar bem?" apresenta uma escolha entre duas opções distintas, mas não é formulada de forma a se enquadrar claramente em nenhuma das categorias pré-definidas. Não se trata de uma busca por uma ação, justificativa, pessoa, local, ponto no tempo, método ou custo específico. Portanto, não se encaixa nas categorias estabelecidas e, assim sendo, é classificada…		t3_1fr272h
		t3_1fr2fh6	As empresas ainda contratam Júnior?	FALSE			reddit	as empresas ainda contratam junior	as empresas ainda contratam junior	['as', 'empresas', 'ainda', 'contratam', 'junior']	as empresas ainda contratam junior	5	O quê	1	5	A pergunta "As empresas ainda contratam Júnior?" busca saber sobre uma ação específica por parte das empresas, que é a contratação de profissionais no nível Júnior. A questão pede a identificação se essa prática ainda está em execução, alinhando-se à categoria "O quê", que envolve a busca por saber se uma ação está sendo realizada.		t3_1fr2fh6
		t3_1fqxpez	Monitor que fica na vertical vale a pena pra front-end?	FALSE			reddit	monitor que fica na vertical vale a pena pra frontend	monitor que fica na vertical vale a pena pra frontend	['monitor', 'que', 'fica', 'na', 'vertical', 'vale', 'a', 'pena', 'pra', 'frontend']	monitor que fica na vertical vale a pena pra frontend	10	Por quê	1	10	A pergunta "Monitor que fica na vertical vale a pena pra front-end?" está buscando uma justificativa ou motivação para decidir se o uso de um monitor na vertical traz benefícios ou vantagens para o trabalho de front-end. Portanto, ela se enquadra na categoria "Por quê", pois busca entender os motivos pelos quais essa configuração de monitor poderia ser vantajosa ou não.		t3_1fqxpez
		t3_1fqw0rm	Dev investidor - fundos imobiliários?	FALSE			reddit	dev investidor fundos imobiliarios	dev investidor fundos imobiliarios	['dev', 'investidor', 'fundos', 'imobiliarios']	dev investidor fundos imobiliarios	4	Outro	1	4	A pergunta apresentada não tem uma estrutura clara que permita a sua classificação nas categorias fornecidas. Ela parece estar incompleta ou fora de contexto, não delineando um questionamento específico sobre ação, responsabilidade, localização, cronologia, método, custo ou justificativa. Por isso, é classificada como "Outro", visto que não se encaixa em nenhuma das categorias definidas.		t3_1fqw0rm
		t3_1fqwbeu	É plausível criar um programa full stack java sozinho até novembro?	FALSE			reddit	e plausivel criar um programa full stack java sozinho ate novembro	e plausivel criar um programa full stack java sozinho ate novembro	['e', 'plausivel', 'criar', 'um', 'programa', 'full', 'stack', 'java', 'sozinho', 'ate', 'novembro']	e plausivel criar um programa full stack java sozinho ate novembro	11	Quanto	1	11	A pergunta está questionando sobre a viabilidade de criar um programa em um determinado prazo (até novembro). Isso implica considerar o tempo necessário para completar a tarefa, o que a classifica na categoria "Quanto", já que envolve o custo em termos de tempo.		t3_1fqwbeu
		t3_1fqkhs7	Techs recruiters que não sabem nada de TI?	FALSE			reddit	techs recruiters que nao sabem nada de ti	techs recruiters que nao sabem nada de ti	['techs', 'recruiters', 'que', 'nao', 'sabem', 'nada', 'de', 'ti']	techs recruiters que nao sabem nada de ti	8	Outro	1	8	A pergunta não apresenta uma estrutura clara que permita categorizá-la em uma das opções fornecidas. Não está claro qual é a informação ou explicação desejada, já que se trata mais de uma afirmação implícita do que uma pergunta direta ancorada em algum contexto específico ou categorizável. A frase parece mais um comentário ou crítica a uma situação do que uma pergunta específica que busque inform…		t3_1fqkhs7
		t3_1fqme92	Melhor forma de se tornar DBA/Engenheiro de Dados?	FALSE			reddit	melhor forma de se tornar dbaengenheiro de dados	melhor forma de se tornar dbaengenheiro de dados	['melhor', 'forma', 'de', 'se', 'tornar', 'dbaengenheiro', 'de', 'dados']	melhor forma de se tornar dbaengenheiro de dados	8	Como	0.875	7	A pergunta "Melhor forma de se tornar DBA/Engenheiro de Dados?" busca saber como alcançar o objetivo de se tornar um DBA (Database Administrator) ou Engenheiro de Dados, ou seja, está pedindo orientação sobre os métodos ou o caminho a ser seguido para chegar a esse resultado.		t3_1fqme92
		t3_1fq82cp	Devo continuar estudando pra data science ou focar em engenharia de software?	FALSE			reddit	devo continuar estudando pra data science ou focar em engenharia de software	devo continuar estudando pra data science ou focar em engenharia de software	['devo', 'continuar', 'estudando', 'pra', 'data', 'science', 'ou', 'focar', 'em', 'engenharia', 'de', 'software']	devo continuar estudando pra data science ou focar em engenharia de software	12	O quê	1	12	A pergunta está buscando uma decisão ou orientação sobre qual caminho seguir em termos de estudo, ou seja, se deve continuar com data science ou focar em engenharia de software. Isso se alinha com a categorização de "O quê", pois trata de uma escolha a ser feita ou uma ação a ser definida.		t3_1fq82cp
		t3_1fq7iez	Já recebeu uma proposta que assustou?	FALSE			reddit	ja recebeu uma proposta que assustou	ja recebeu uma proposta que assustou	['ja', 'recebeu', 'uma', 'proposta', 'que', 'assustou']	ja recebeu uma proposta que assustou	6	O quê	1	6	A pergunta "Já recebeu uma proposta que assustou?" busca identificar se uma determinada situação, ou seja, uma proposta que cause medo ou desconforto, já ocorreu com a pessoa. A palavra "proposta" está ligada à ideia de uma ação ou oferta específica, e o termo "assustou" refere-se ao impacto ou a natureza dessa oferta. Portanto, a pergunta se encaixa na categoria "O quê", que se refere à identifi…		t3_1fq7iez
		t3_1fq3aqx	Microsoft anuncia que vai investir R$ 14,7 bilhões em tecnologia no Brasil	FALSE			reddit	microsoft anuncia que vai investir r$ 147 bilhoes em tecnologia no brasil	microsoft anuncia que vai investir r$ 147 bilhoes em tecnologia no brasil	['microsoft', 'anuncia', 'que', 'vai', 'investir', 'r$', '147', 'bilhoes', 'em', 'tecnologia', 'no', 'brasil']	microsoft anuncia que vai investir r$ 147 bilhoes em tecnologia no brasil	12	Outro	1	12	A frase apresentada não é uma pergunta, mas sim uma declaração de um fato. Portanto, não se enquadra em nenhuma das categorias de perguntas listadas. Um anúncio de investimento não pede por uma ação, justificativa, identificação de responsável, localização, cronologia, metodologia ou quantificação em termos de categoria de pergunta, embora mencione um valor financeiro, não está questionando sobre…		t3_1fq3aqx
		t3_1fq2mpo	Se você fosse eu...? (H/27)	FALSE			reddit	se voce fosse eu h27	se voce fosse eu h27	['se', 'voce', 'fosse', 'eu', 'h27']	se voce fosse eu h27	5	Outro	1	5	A pergunta "Se você fosse eu...? (H/27)" não se enquadra em nenhuma das categorias especificadas, pois não busca uma ação específica, justificação, identificação de responsáveis, localização, tempo, método ou custo. Ela parece incompleta ou hipotética e não fornece contexto suficiente para ser classificada dentro das categorias listadas.		t3_1fq2mpo
		t3_1fq0efw	Compensa fazer faculdade ds engenharia da computação após terminar análise de sistemas ou outra faculdade seria melhor?	FALSE			reddit	compensa fazer faculdade ds engenharia da computacao apos terminar analise de sistemas ou outra faculdade seria melhor	compensa fazer faculdade ds engenharia da computacao apos terminar analise de sistemas ou outra faculdade seria melhor	['compensa', 'fazer', 'faculdade', 'ds', 'engenharia', 'da', 'computacao', 'apos', 'terminar', 'analise', 'de', 'sistemas', 'ou', 'outra', 'faculdade', 'seria', 'melhor']	compensa fazer faculdade ds engenharia da computacao apos terminar analise de sistemas ou outra faculdade seria melhor	17	Por quê	0.941176	16	A pergunta está buscando uma justificativa ou avaliação de valor, questionando se vale a pena fazer uma faculdade específica após concluir um curso de análise de sistemas. Portanto, o foco está em entender a motivação ou razão para escolher entre uma faculdade de engenharia da computação ou outra.		t3_1fq0efw
		t3_1fpy93g	Dois empregos ou Um emprego?	FALSE			reddit	dois empregos ou um emprego	dois empregos ou um emprego	['dois', 'empregos', 'ou', 'um', 'emprego']	dois empregos ou um emprego	5	Outro	1	5	A pergunta "Dois empregos ou Um emprego?" não se encaixa diretamente em nenhuma das categorias estabelecidas. Não está pedindo uma ação específica, justificativa, pessoa, localização, tempo, método ou custo. A pergunta se apresenta como uma escolha ou reflexão entre duas opções (ter dois empregos ou um só), sem indicar um contexto claro que a classifique como uma das categorias mencionadas.		t3_1fpy93g
		t3_1fpwnny	Sugestão de que caminho seguir	FALSE			reddit	sugestao de que caminho seguir	sugestao de que caminho seguir	['sugestao', 'de', 'que', 'caminho', 'seguir']	sugestao de que caminho seguir	5	O quê	1	5	A pergunta busca uma sugestão de ação, ou seja, está pedindo indicações sobre qual caminho a ser seguido. Trata-se de uma questão que envolve escolhas sobre o que fazer.		t3_1fpwnny
		t3_1fpvmrp	Carreira em cybersec, faculdade de tecnólogo vale para entrar na área?	FALSE			reddit	carreira em cybersec faculdade de tecnologo vale para entrar na area	carreira em cybersec faculdade de tecnologo vale para entrar na area	['carreira', 'em', 'cybersec', 'faculdade', 'de', 'tecnologo', 'vale', 'para', 'entrar', 'na', 'area']	carreira em cybersec faculdade de tecnologo vale para entrar na area	11	Como	1	11	A pergunta busca informações sobre o método ou condição (ter uma faculdade de tecnólogo) para ingressar na carreira de segurança cibernética, portanto, está relacionada a como uma ação pode ser executada ou como alcançar um objetivo.		t3_1fpvmrp
		t3_1fpvalv	VPS Hostinger é boa?	FALSE			reddit	vps hostinger e boa	vps hostinger e boa	['vps', 'hostinger', 'e', 'boa']	vps hostinger e boa	4	O quê	1	4	A pergunta "VPS Hostinger é boa?" busca uma avaliação ou característica sobre o serviço de VPS oferecido pela Hostinger. Neste caso, a pergunta se enquadra na categoria "O quê" porque o usuário está pedindo uma identificação ou avaliação de qualidade do produto específico, ou seja, busca saber se o serviço é bom.		t3_1fpvalv
		t3_1fpb5kh	Culpa por ganhar bem e fingir que trabalho	FALSE			reddit	culpa por ganhar bem e fingir que trabalho	culpa por ganhar bem e fingir que trabalho	['culpa', 'por', 'ganhar', 'bem', 'e', 'fingir', 'que', 'trabalho']	culpa por ganhar bem e fingir que trabalho	8	Outro	1	8	A frase "Culpa por ganhar bem e fingir que trabalho" não apresenta uma estrutura clara de pergunta e não se enquadra em nenhuma das categorias fornecidas. Não há um pedido de esclarecimento ou uma busca de informação específica que permita classificá-la como uma pergunta dentro das categorias mencionadas.		t3_1fpb5kh
		t3_1fp4yes	Vocês podem por favor não ser tão produtivos no escritório?	FALSE			reddit	voces podem por favor nao ser tao produtivos no escritorio	voces podem por favor nao ser tao produtivos no escritorio	['voces', 'podem', 'por', 'favor', 'nao', 'ser', 'tao', 'produtivos', 'no', 'escritorio']	voces podem por favor nao ser tao produtivos no escritorio	10	O quê	1	10	A pergunta está solicitando uma ação específica e direta (não serem tão produtivos no escritório), o que a classifica na categoria "O quê", que abrange pedidos de ações a serem executadas ou evitadas.		t3_1fp4yes
		t3_1fpk5yz	GML é uma linguagem fácil de aprender pra alguém que não sabe nada de programação??	FALSE			reddit	gml e uma linguagem facil de aprender pra alguem que nao sabe nada de programacao	gml e uma linguagem facil de aprender pra alguem que nao sabe nada de programacao	['gml', 'e', 'uma', 'linguagem', 'facil', 'de', 'aprender', 'pra', 'alguem', 'que', 'nao', 'sabe', 'nada', 'de', 'programacao']	gml e uma linguagem facil de aprender pra alguem que nao sabe nada de programacao	15	Como	0.933333	14	A pergunta busca entender como é o processo de aprendizado da linguagem GML para uma pessoa sem conhecimentos prévios em programação, ou seja, está questionando sobre a forma ou o método de aprendizado nesta situação específica.		t3_1fpk5yz
		t3_1fpiig0	Alguém já fez a transição de Dev para Product Manager? Deu certo?	FALSE			reddit	alguem ja fez a transicao de dev para product manager deu certo	alguem ja fez a transicao de dev para product manager deu certo	['alguem', 'ja', 'fez', 'a', 'transicao', 'de', 'dev', 'para', 'product', 'manager', 'deu', 'certo']	alguem ja fez a transicao de dev para product manager deu certo	12	Outro	1	12	A pergunta não se encaixa precisamente em nenhuma das categorias listadas, pois é mais uma experiência pessoal sobre uma transição de carreira ("Alguém já fez a transição de Dev para Product Manager? Deu certo?"). Não está buscando uma ação, justificativa, pessoa, localização, tempo, método ou custo específico.		t3_1fpiig0
		t3_1fph3zc	Fiz a entrevista tecnica e agora?	FALSE			reddit	fiz a entrevista tecnica e agora	fiz a entrevista tecnica e agora	['fiz', 'a', 'entrevista', 'tecnica', 'e', 'agora']	fiz a entrevista tecnica e agora	6	O quê	1	6	A pergunta "Fiz a entrevista técnica e agora?" busca saber qual a próxima ação a ser executada após a realização da entrevista técnica. Ela está em busca de uma orientação sobre os próximos passos a serem tomados, portanto se encaixa na categoria "O quê", que se refere a ações a serem realizadas ou identificações de algo que precisa ser feito.		t3_1fph3zc
		t3_1fphftj	devo recomeçar do zero?	FALSE			reddit	devo recomecar do zero	devo recomecar do zero	['devo', 'recomecar', 'do', 'zero']	devo recomecar do zero	4	O quê	1	4	A pergunta "devo recomeçar do zero?" busca identificar se uma ação específica, no caso "recomeçar do zero", deve ser executada. A pessoa está pedindo uma orientação ou sugestão sobre a ação a ser tomada, que se enquadra na categoria "O quê".		t3_1fphftj
		t3_1fpdkhw	Melhores lugares para vagas remotas internacionais?	FALSE			reddit	melhores lugares para vagas remotas internacionais	melhores lugares para vagas remotas internacionais	['melhores', 'lugares', 'para', 'vagas', 'remotas', 'internacionais']	melhores lugares para vagas remotas internacionais	6	Onde	1	6	A pergunta "Melhores lugares para vagas remotas internacionais?" busca a indicação de lugares específicos, neste caso, plataformas, sites ou comunidades que são melhores para encontrar vagas remotas internacionais. A palavra "lugares" reforça que a pergunta é sobre "onde" se pode encontrar tais vagas.		t3_1fpdkhw
		t3_1fp4o7i	Estou fazendo um Home Office Reverso?	FALSE			reddit	estou fazendo um home office reverso	estou fazendo um home office reverso	['estou', 'fazendo', 'um', 'home', 'office', 'reverso']	estou fazendo um home office reverso	6	Outro	1	6	A pergunta "Estou fazendo um Home Office Reverso?" não se encaixa claramente nas categorias fornecidas. Parece ser uma autoavaliação ou uma verificação pessoal do estado ou situação de trabalho da pessoa que pergunta, e não busca uma resposta que se alinha com ações, motivos, identificações, localizações, cronologias, métodos ou quantificações. Assim, não é possível classificá-la nas categorias l…		t3_1fp4o7i
		t3_1fpa6rk	.Net e Angular ou React e Node na gringa?	FALSE			reddit	net e angular ou react e node na gringa	net e angular ou react e node na gringa	['net', 'e', 'angular', 'ou', 'react', 'e', 'node', 'na', 'gringa']	net e angular ou react e node na gringa	9	Outro	0.888889	8	A pergunta ".Net e Angular ou React e Node na gringa?" não apresenta uma estrutura clara que se encaixe em nenhuma das categorias definidas. Não está explícito o que está sendo perguntado em termos de ação, motivo, pessoa, lugar, tempo, método ou custo. Parece se referir a uma escolha ou comparação entre dois conjuntos de tecnologias e sua aplicação "na gringa", mas sem uma pergunta específica co…		t3_1fpa6rk
		t3_1fp9onx	Melhor forma de compartilhar arquivos?	FALSE			reddit	melhor forma de compartilhar arquivos	melhor forma de compartilhar arquivos	['melhor', 'forma', 'de', 'compartilhar', 'arquivos']	melhor forma de compartilhar arquivos	5	Como	1	5	A pergunta busca saber de que maneira ou método se deve empregar para realizar a ação de compartilhar arquivos. Está interessada nas formas ou métodos para executar o compartilhamento, o que a categoriza como uma pergunta de "Como".		t3_1fp9onx
		t3_1fp7ftn	PHP vale apena?	FALSE			reddit	php vale apena	php vale apena	['php', 'vale', 'apena']	php vale apena	3	O quê	1	3	A pergunta "PHP vale a pena?" está buscando uma avaliação ou recomendação sobre se a linguagem PHP deve ser utilizada ou não. Trata-se de entender a ação a ser tomada (utilizar ou não utilizar PHP) com base em seus benefícios ou desvantagens, o que se alinha à categoria "O quê", que cobre perguntas sobre identificação de algo ou a ação a ser executada.		t3_1fp7ftn
		t3_1fp7tf6	Certificações vale apena?	FALSE			reddit	certificacoes vale apena	certificacoes vale apena	['certificacoes', 'vale', 'apena']	certificacoes vale apena	3	Por quê	1	3	A pergunta "Certificações vale a pena?" está pedindo uma justificativa ou explicação sobre o valor ou benefício de obter certificações, logo, está buscando uma motivação ou objetivo de algo ser feito. Isso a classifica como uma pergunta do tipo "Por quê", já que o foco está na razão por trás de realizar ou não a ação de buscar certificações.		t3_1fp7tf6
		t3_1fp4cd9	Ajuda! Aceitar proposta CLT de uma nova empresa presencial e abandonar o PJ remoto?	FALSE			reddit	ajuda aceitar proposta clt de uma nova empresa presencial e abandonar o pj remoto	ajuda aceitar proposta clt de uma nova empresa presencial e abandonar o pj remoto	['ajuda', 'aceitar', 'proposta', 'clt', 'de', 'uma', 'nova', 'empresa', 'presencial', 'e', 'abandonar', 'o', 'pj', 'remoto']	ajuda aceitar proposta clt de uma nova empresa presencial e abandonar o pj remoto	14	O quê	1	14	A pergunta está buscando uma orientação sobre uma decisão a ser tomada: se deve ou não aceitar uma proposta de emprego CLT e sair de um emprego PJ. Está pedindo por conselhos sobre a ação correta a ser executada.		t3_1fp4cd9
		t3_1fp3uum	Com dúvidas? Não sabe que faculdade fazer? Leia este post antes de postar no r/brdev	FALSE			reddit	com duvidas nao sabe que faculdade fazer leia este post antes de postar no rbrdev	com duvidas nao sabe que faculdade fazer leia este post antes de postar no rbrdev	['com', 'duvidas', 'nao', 'sabe', 'que', 'faculdade', 'fazer', 'leia', 'este', 'post', 'antes', 'de', 'postar', 'no', 'rbrdev']	com duvidas nao sabe que faculdade fazer leia este post antes de postar no rbrdev	15	Outro	1	15	A frase apresentada não é uma pergunta direta. Ela parece ser uma introdução ou uma instrução sugerindo que alguém deve ler um post específico antes de fazer outra ação, que é postar no r/brdev. Embora mencione uma dúvida sobre qual faculdade escolher, não está formulada como uma pergunta que busca uma resposta. Portanto, não se enquadra nas categorias de perguntas apresentadas.		t3_1fp3uum
		t3_1fp3qc7	Sair de ADS pra fazer engenharia de Software ou Ciência da computação?	FALSE			reddit	sair de ads pra fazer engenharia de software ou ciencia da computacao	sair de ads pra fazer engenharia de software ou ciencia da computacao	['sair', 'de', 'ads', 'pra', 'fazer', 'engenharia', 'de', 'software', 'ou', 'ciencia', 'da', 'computacao']	sair de ads pra fazer engenharia de software ou ciencia da computacao	12	O quê	0.916667	11	A pergunta busca uma ação a ser executada, que é a decisão de trocar o curso de ADS (Análise e Desenvolvimento de Sistemas) por Engenharia de Software ou Ciência da Computação. Está pedindo uma recomendação sobre qual curso seguir, portanto, se encaixa na categoria "O quê" por buscar identificação de uma escolha a ser feita.		t3_1fp3qc7
		t3_1for75u	Trabalhar muito e ganhar muito ou ser do tipo "deu minha hora, tchau"?	FALSE			reddit	trabalhar muito e ganhar muito ou ser do tipo deu minha hora tchau	trabalhar muito e ganhar muito ou ser do tipo deu minha hora tchau	['trabalhar', 'muito', 'e', 'ganhar', 'muito', 'ou', 'ser', 'do', 'tipo', 'deu', 'minha', 'hora', 'tchau']	trabalhar muito e ganhar muito ou ser do tipo deu minha hora tchau	13	O quê	0.923077	12	A pergunta está propondo dois cenários de ação envolvendo trabalho: "trabalhar muito e ganhar muito" versus "ser do tipo 'deu minha hora, tchau'". Isso indica que a pergunta busca uma definição sobre qual ação ou modo de vida profissional se deve optar, tratando-se, assim, de uma questão de escolha entre duas opções de ação ou comportamento. Portanto, a pergunta tem relação com o que fazer em ter…		t3_1for75u
		t3_1fp235v	Migrar de Stack ou n?	FALSE			reddit	migrar de stack ou n	migrar de stack ou n	['migrar', 'de', 'stack', 'ou', 'n']	migrar de stack ou n	5	Outro	1	5	A pergunta "Migrar de Stack ou n?" é uma questão confusa e não está clara o suficiente para ser categorizada em nenhuma das categorias definidas. A ausência de contexto não permite identificar se a pergunta busca uma ação (O quê), uma justificativa (Por quê), ou outro tipo de informação. Além disso, a pergunta está mal formulada e incompleta, o que dificulta a categorização precisa. Portanto, cla…		t3_1fp235v
		t3_1foufvn	É possível aumentar o conhecimento em 3 semanas?	FALSE			reddit	e possivel aumentar o conhecimento em 3 semanas	e possivel aumentar o conhecimento em 3 semanas	['e', 'possivel', 'aumentar', 'o', 'conhecimento', 'em', '3', 'semanas']	e possivel aumentar o conhecimento em 3 semanas	8	Quanto	1	8	A pergunta "É possível aumentar o conhecimento em 3 semanas?" envolve a consideração de um intervalo de tempo específico (3 semanas) para avaliar a viabilidade de uma ação (aumentar o conhecimento). Portanto, está relacionada à quantificação temporal, encaixando-se na categoria "Quanto".		t3_1foufvn
		t3_1foqty4	É possível conseguir boas vagas de analista tendo sido apenas dev?	FALSE			reddit	e possivel conseguir boas vagas de analista tendo sido apenas dev	e possivel conseguir boas vagas de analista tendo sido apenas dev	['e', 'possivel', 'conseguir', 'boas', 'vagas', 'de', 'analista', 'tendo', 'sido', 'apenas', 'dev']	e possivel conseguir boas vagas de analista tendo sido apenas dev	11	O quê	1	11	A pergunta busca identificar a possibilidade de uma ação ou situação específica, ou seja, a capacidade de conseguir boas vagas de analista após ter sido desenvolvedor. Está relacionada com a identificação de uma situação ou oportunidade no mercado de trabalho.		t3_1foqty4
		t3_1fomquv	Double CLT (?)	FALSE			reddit	double clt	double clt	['double', 'clt']	double clt	2	Outro	1	2	A pergunta "Double CLT (?)" não fornece informações suficientes para classificá-la adequadamente em uma das categorias. O texto é muito vago e não indica claramente uma questão sobre ação, justificativa, pessoa, local, tempo, método ou custo. Sem mais contexto, não é possível determinar o tipo de informação que está sendo solicitada.		t3_1fomquv
		t3_1foh6zo	TDD ?	FALSE			reddit	tdd	tdd	['tdd']	tdd	1	Outro	1	1	A pergunta "TDD ?" é vaga e não fornece contexto suficiente para classificá-la em nenhuma das categorias específicas fornecidas. Ela carece de detalhes que indicariam se está perguntando sobre o que é TDD, por que se usa TDD, como implementar TDD, etc. Portanto, é classificada como "Outro" devido à falta de especificidade e contexto.		t3_1foh6zo
		t3_1foi2i5	Estagiario serve pra algo?	FALSE			reddit	estagiario serve pra algo	estagiario serve pra algo	['estagiario', 'serve', 'pra', 'algo']	estagiario serve pra algo	4	O quê	1	4	A pergunta busca identificar a utilidade ou função de um estagiário, ou seja, quer saber qual é o propósito ou valor de ter um estagiário em um determinado contexto. Portanto, está perguntando o que o estagiário faz ou para que serve.		t3_1foi2i5
		t3_1fnji58	Pessoal tem que entender que prog/desenvolvimento é emprego e não "estilo de vida"	FALSE			reddit	pessoal tem que entender que progdesenvolvimento e emprego e nao estilo de vida	pessoal tem que entender que progdesenvolvimento e emprego e nao estilo de vida	['pessoal', 'tem', 'que', 'entender', 'que', 'progdesenvolvimento', 'e', 'emprego', 'e', 'nao', 'estilo', 'de', 'vida']	pessoal tem que entender que progdesenvolvimento e emprego e nao estilo de vida	13	Outro	0.846154	11	A declaração apresentada não é uma pergunta ou pedido de informação, mas sim uma afirmação ou opinião sobre a percepção de emprego em programação/desenvolvimento. Portanto, ela não se encaixa em nenhuma das categorias de perguntas listadas.		t3_1fnji58
		t3_1foduqi	Matemática e realmente necessário?	FALSE			reddit	matematica e realmente necessario	matematica e realmente necessario	['matematica', 'e', 'realmente', 'necessario']	matematica e realmente necessario	4	Por quê	1	4	A pergunta "Matemática é realmente necessário?" busca justificativa ou motivo para a necessidade da matemática, tentando entender a razão pela qual a matemática é considerada importante ou essencial. Portanto, ela se enquadra na categoria "Por quê", que lida com perguntas que buscam justificativas ou o objetivo de algo.		t3_1foduqi
		t3_1focb6o	C++ ou Java para Estrutura de Dados Lineares?	FALSE			reddit	c++ ou java para estrutura de dados lineares	c++ ou java para estrutura de dados lineares	['c++', 'ou', 'java', 'para', 'estrutura', 'de', 'dados', 'lineares']	c++ ou java para estrutura de dados lineares	8	O quê	1	8	A pergunta está solicitando uma recomendação sobre qual linguagem de programação usar para Estrutura de Dados Lineares, sendo uma escolha entre C++ ou Java. A busca por uma ação ou decisão a ser feita se encaixa na categoria "O quê".		t3_1focb6o
		t3_1focpd4	Energia Nuclear para IA. Seria esse o futuro?	FALSE			reddit	energia nuclear para ia seria esse o futuro	energia nuclear para ia seria esse o futuro	['energia', 'nuclear', 'para', 'ia', 'seria', 'esse', 'o', 'futuro']	energia nuclear para ia seria esse o futuro	8	O quê	1	8	A pergunta está buscando uma ideia ou conceito que pode ser considerado o futuro para a Energia Nuclear aplicada à Inteligência Artificial (IA). Está questionando se essa combinação seria uma tendência ou caminho a ser seguido, caracterizando a busca por identificação de algo ou um conceito futuro.		t3_1focpd4
		t3_1fo9wtn	Pós em JOGOS DIGITAIS... vale a pena?	FALSE			reddit	pos em jogos digitais vale a pena	pos em jogos digitais vale a pena	['pos', 'em', 'jogos', 'digitais', 'vale', 'a', 'pena']	pos em jogos digitais vale a pena	7	Por quê	1	7	A pergunta "Pós em JOGOS DIGITAIS... vale a pena?" busca uma justificativa ou motivação para saber se investir em uma pós-graduação na área de jogos digitais traz benefícios ou é justificado de alguma forma. Está em busca de razões que expliquem se tal escolha é vantajosa ou não.		t3_1fo9wtn
		t3_1fo5dcp	Essa classe C# está boa? Profissional? Padrão de projeto, etc	FALSE			reddit	essa classe c esta boa profissional padrao de projeto etc	essa classe c esta boa profissional padrao de projeto etc	['essa', 'classe', 'c', 'esta', 'boa', 'profissional', 'padrao', 'de', 'projeto', 'etc']	essa classe c esta boa profissional padrao de projeto etc	10	Como	1	10	A pergunta busca saber sobre o estado de algo, neste caso, a qualidade ou adequação de uma classe C# em termos de profissionalismo e aderência a padrões de projeto. Isso está relacionado a como a classe foi ou deve ser estruturada.		t3_1fo5dcp
		t3_1fnyxdr	Java com react ou angular?	FALSE			reddit	java com react ou angular	java com react ou angular	['java', 'com', 'react', 'ou', 'angular']	java com react ou angular	5	O quê	1	5	A pergunta "Java com react ou angular?" está buscando uma identificação ou escolha entre duas opções de frameworks (React ou Angular) para usar com Java. Trata-se de uma decisão sobre qual tecnologia será empregada, encaixando-se na categoria "O quê".		t3_1fnyxdr
		t3_1fnvtw5	Será que tenho chance de virar dev?	FALSE			reddit	sera que tenho chance de virar dev	sera que tenho chance de virar dev	['sera', 'que', 'tenho', 'chance', 'de', 'virar', 'dev']	sera que tenho chance de virar dev	7	Outro	1	7	A pergunta "Será que tenho chance de virar dev?" não se encaixa claramente em nenhuma das categorias predefinidas. Ela expressa uma dúvida pessoal sobre a possibilidade de se tornar um desenvolvedor, mas não pede uma ação específica, explicação, identificação, localização, cronologia, método, responsável ou custo. Portanto, é mais uma reflexão ou questionamento interno sobre potencial ou viabilid…		t3_1fnvtw5
		t3_1fnvngj	Mestrado com salário de empresa é possível?	FALSE			reddit	mestrado com salario de empresa e possivel	mestrado com salario de empresa e possivel	['mestrado', 'com', 'salario', 'de', 'empresa', 'e', 'possivel']	mestrado com salario de empresa e possivel	7	Como	1	7	A pergunta "Mestrado com salário de empresa é possível?" está buscando entender como a combinação de realizar um mestrado enquanto se recebe um salário de uma empresa pode ser viável. Ela está inquirindo sobre o método ou maneira de conciliar ambas as atividades, ou seja, buscando uma forma de tornar isso possível.		t3_1fnvngj
		t3_1fnnggp	Engenharia de software noturno e trabalho CLT ao dia, é possível?	FALSE			reddit	engenharia de software noturno e trabalho clt ao dia e possivel	engenharia de software noturno e trabalho clt ao dia e possivel	['engenharia', 'de', 'software', 'noturno', 'e', 'trabalho', 'clt', 'ao', 'dia', 'e', 'possivel']	engenharia de software noturno e trabalho clt ao dia e possivel	11	Como	0.909091	10	A pergunta busca saber a viabilidade de conciliar duas atividades diferentes, engenharia de software noturna e trabalho CLT durante o dia. Ela quer entender como essas ações podem ser realizadas simultaneamente, então se refere ao método ou estado de conciliação dessas atividades.		t3_1fnnggp
		t3_1fnumcc	DBA vale a pena?	FALSE			reddit	dba vale a pena	dba vale a pena	['dba', 'vale', 'a', 'pena']	dba vale a pena	4	Outro	1	4	A pergunta "DBA vale a pena?" parece estar solicitando uma opinião sobre o investimento em um curso ou atuação como DBA (Administrador de Banco de Dados). Embora subjetiva, não se enquadra claramente nas categorias de pergunta buscando uma ação (O quê), justificativa (Por quê), ou qualquer outra específica de informação prática como lugar, tempo, método ou custo. É uma pergunta que essencialmente…		t3_1fnumcc
		t3_1fnqvm4	Estágio em Engenharia de Dados, estou no caminho certo?	FALSE			reddit	estagio em engenharia de dados estou no caminho certo	estagio em engenharia de dados estou no caminho certo	['estagio', 'em', 'engenharia', 'de', 'dados', 'estou', 'no', 'caminho', 'certo']	estagio em engenharia de dados estou no caminho certo	9	Outro	1	9	A pergunta não se enquadra claramente em nenhuma das categorias específicas fornecidas. Ela é mais sobre a busca por validação ou confirmação de uma decisão pessoal sobre carreira. Não está perguntando especificamente sobre uma ação, justificativa, responsável, local, tempo, método ou custo que se encaixaria nas categorias descritas. Parece ser mais uma questão de opinião pessoal ou conselho de d…		t3_1fnqvm4
		t3_1fnloga	O design do projeto é muito importante no começo?	FALSE			reddit	o design do projeto e muito importante no comeco	o design do projeto e muito importante no comeco	['o', 'design', 'do', 'projeto', 'e', 'muito', 'importante', 'no', 'comeco']	o design do projeto e muito importante no comeco	9	Por quê	1	9	A pergunta questiona a importância do design no início de um projeto, buscando uma justificativa ou razão para essa importância. Portanto, ela se enquadra na categoria "Por quê", pois está pedindo uma explicação sobre a relevância do design em um determinado contexto temporal (no começo do projeto).		t3_1fnloga
		t3_1fn79m0	Nome de faculdade importa no currículo?	FALSE			reddit	nome de faculdade importa no curriculo	nome de faculdade importa no curriculo	['nome', 'de', 'faculdade', 'importa', 'no', 'curriculo']	nome de faculdade importa no curriculo	6	O quê	1	6	A pergunta indaga sobre a importância do nome da faculdade no currículo, ou seja, está buscando entender se há um fator específico (o nome da faculdade) que é relevante ou não em um contexto particular (currículo), o que alinha com a identificação ou especificação de um elemento ou ação.		t3_1fn79m0
		t3_1fmy0hi	Choque de realidade ao trocar de empresa	FALSE			reddit	choque de realidade ao trocar de empresa	choque de realidade ao trocar de empresa	['choque', 'de', 'realidade', 'ao', 'trocar', 'de', 'empresa']	choque de realidade ao trocar de empresa	7	Outro	0.857143	6	A pergunta "Choque de realidade ao trocar de empresa" não se encaixa claramente em nenhuma das categorias listadas, pois não é uma pergunta direta que busca uma ação, justificativa, pessoa, local, tempo, modo ou custo específico. Ao invés disso, parece ser uma afirmação ou reflexão sobre uma experiência vivida ao trocar de empresa, e não uma pergunta que se enquadre em uma das categorias definida…		t3_1fmy0hi
		t3_1fn358x	Pós EAD vale a pena?	FALSE			reddit	pos ead vale a pena	pos ead vale a pena	['pos', 'ead', 'vale', 'a', 'pena']	pos ead vale a pena	5	Por quê	1	5	A pergunta "Pós EAD vale a pena?" está buscando uma justificativa ou razão para determinar se a realização de uma pós-graduação a distância (EAD) é vantajosa. A questão implícita é sobre as motivações ou benefícios que justificam a escolha por esse formato de ensino, caindo assim na categoria de perguntas que buscam justificativas ou razões para uma ação ou decisão.		t3_1fn358x
		t3_1fmrvoa	Será que tem problema ir para outro país trabalhando home office?	FALSE			reddit	sera que tem problema ir para outro pais trabalhando home office	sera que tem problema ir para outro pais trabalhando home office	['sera', 'que', 'tem', 'problema', 'ir', 'para', 'outro', 'pais', 'trabalhando', 'home', 'office']	sera que tem problema ir para outro pais trabalhando home office	11	O quê	1	11	A pergunta busca identificar se há algum problema associado à ação de ir para outro país enquanto trabalha em home office. Está pedindo uma avaliação da situação para determinar se tal ação pode ser problemática, o que se encaixa na categoria "O quê", que abrange a identificação de problemas ou a ação a ser executada.		t3_1fmrvoa
		t3_1fm72ev	Junior tem que ser jogado na fogueira pra aprender?	FALSE			reddit	junior tem que ser jogado na fogueira pra aprender	junior tem que ser jogado na fogueira pra aprender	['junior', 'tem', 'que', 'ser', 'jogado', 'na', 'fogueira', 'pra', 'aprender']	junior tem que ser jogado na fogueira pra aprender	9	Outro	1	9	A pergunta apresentada contém uma expressão figurativa e não busca informações que possam ser claramente classificadas em nenhuma das categorias especificadas. A expressão "ser jogado na fogueira" é uma metáfora que pode se referir a colocar alguém em uma situação desafiadora ou de alto risco para aprendizado, mas não há uma pergunta objetiva sobre ação, motivo, responsável, local, tempo, método …		t3_1fm72ev
		t3_1fmdol2	Ouço sons do MS Teams aleatoriamente. Estou louco?	FALSE			reddit	ouco sons do ms teams aleatoriamente estou louco	ouco sons do ms teams aleatoriamente estou louco	['ouco', 'sons', 'do', 'ms', 'teams', 'aleatoriamente', 'estou', 'louco']	ouco sons do ms teams aleatoriamente estou louco	8	Outro	1	8	A pergunta apresentada não se enquadra em nenhuma das categorias fornecidas. Não se trata de uma busca por ações, justificativas, responsáveis, locais, tempos, métodos ou custos. A pergunta parece expressar uma preocupação pessoal sobre uma experiência subjetiva (ouvir sons aleatórios) e uma dúvida pessoal (estar ou não "louco").		t3_1fmdol2
		t3_1fmhewa	Passaporte europeu ajuda a conseguir trabalho remoto fora do Brasil?	FALSE			reddit	passaporte europeu ajuda a conseguir trabalho remoto fora do brasil	passaporte europeu ajuda a conseguir trabalho remoto fora do brasil	['passaporte', 'europeu', 'ajuda', 'a', 'conseguir', 'trabalho', 'remoto', 'fora', 'do', 'brasil']	passaporte europeu ajuda a conseguir trabalho remoto fora do brasil	10	Por quê	1	10	A pergunta busca entender qual é a razão ou justificativa pela qual ter um passaporte europeu poderia ajudar a conseguir trabalho remoto fora do Brasil. Está inquirindo sobre a motivação ou o benefício desse documento específico para facilitar essa condição de trabalho.		t3_1fmhewa
		t3_1fm4geq	TI É PRA TODOS MAS NEM TODOS SÃO PRA TI?!	FALSE			reddit	ti e pra todos mas nem todos sao pra ti	ti e pra todos mas nem todos sao pra ti	['ti', 'e', 'pra', 'todos', 'mas', 'nem', 'todos', 'sao', 'pra', 'ti']	ti e pra todos mas nem todos sao pra ti	10	Outro	0.7	7	A pergunta "TI É PRA TODOS MAS NEM TODOS SÃO PRA TI?!" não se encaixa diretamente em nenhuma das categorias especificadas. Não é uma pergunta que busca uma ação específica, justificativa, responsável, localização, tempo, método, ou custo. Em vez disso, parece ser uma afirmação retórica ou provocativa sobre a compatibilidade das pessoas com a área de Tecnologia da Informação, sem um pedido claro d…		t3_1fm4geq
		t3_1fln9m0	Desabafo de um cara que almeja ter uma carreira internacional	FALSE			reddit	desabafo de um cara que almeja ter uma carreira internacional	desabafo de um cara que almeja ter uma carreira internacional	['desabafo', 'de', 'um', 'cara', 'que', 'almeja', 'ter', 'uma', 'carreira', 'internacional']	desabafo de um cara que almeja ter uma carreira internacional	10	Outro	1	10	A frase "Desabafo de um cara que almeja ter uma carreira internacional" não é uma pergunta, mas sim uma declaração. Portanto, não se enquadra em nenhuma das categorias de perguntas listadas (O quê, Por quê, Quem, Onde, Quando, Como, Quanto). Não há uma interrogação explícita que indique uma busca específica por informação, justificativa, identidade, local, tempo, método ou custo. Isso torna difíc…		t3_1fln9m0
		t3_1fm9kwl	é interssante investir na area de inteligencia artificial?	FALSE			reddit	e interssante investir na area de inteligencia artificial	e interssante investir na area de inteligencia artificial	['e', 'interssante', 'investir', 'na', 'area', 'de', 'inteligencia', 'artificial']	e interssante investir na area de inteligencia artificial	8	Por quê	1	8	A pergunta "é interessante investir na área de inteligência artificial?" busca por uma justificativa ou razão para investir (ou não) nesse campo. Assim, o foco está em entender a motivação ou o benefício potencial de tal investimento, o que se alinha à categoria "Por quê", que busca justificativas ou objetivos para uma ação.		t3_1fm9kwl
		t3_1flon3e	já sou velho para o mercado ?	FALSE			reddit	ja sou velho para o mercado	ja sou velho para o mercado	['ja', 'sou', 'velho', 'para', 'o', 'mercado']	ja sou velho para o mercado	6	Outro	1	6	A pergunta "já sou velho para o mercado?" expressa uma preocupação pessoal sobre a adequação ou relevância para o mercado de trabalho, mas não se enquadra diretamente em nenhuma das categorias definidas, como ação específica, localização, cronologia, método, responsabilidade ou justificativa. É uma questão mais subjetiva e não claramente relacionada a um pedido de informação factual que se enquad…		t3_1flon3e
		t3_1flwsl6	Javascript é o futuro?	FALSE			reddit	javascript e o futuro	javascript e o futuro	['javascript', 'e', 'o', 'futuro']	javascript e o futuro	4	Outro	1	4	A pergunta "Javascript é o futuro?" não se encaixa diretamente em nenhuma das categorias acima. Ela parece estar buscando uma previsão ou uma opinião sobre a relevância futura de uma tecnologia, sem questionar uma ação específica, motivação, responsável, local, momento, método ou custo. Portanto, ela não corresponde diretamente a nenhuma das categorias fornecidas.		t3_1flwsl6
		t3_1flrkx5	fui explorado?	FALSE			reddit	fui explorado	fui explorado	['fui', 'explorado']	fui explorado	2	Outro	1	2	A pergunta "fui explorado?" não se encaixa claramente em nenhuma das categorias fornecidas. Ela parece ser uma pergunta retórica ou subjetiva, buscando validação ou reflexão sobre uma situação pessoal e não está pedindo informações específicas sobre ações, motivos, pessoas, lugares, tempos, métodos ou custos. Devido à sua natureza subjetiva, classifiquei como "Outro".		t3_1flrkx5
		t3_1fm2joz	42 ou 43 anos é muito velho?	FALSE			reddit	42 ou 43 anos e muito velho	42 ou 43 anos e muito velho	['42', 'ou', '43', 'anos', 'e', 'muito', 'velho']	42 ou 43 anos e muito velho	7	Outro	1	7	A pergunta "42 ou 43 anos é muito velho?" não se enquadra claramente em nenhuma das categorias definidas. Ela parece estar explorando percepções subjetivas sobre idade e não está buscando uma ação, justificativa, identificação de um responsável, localização, momento, método, ou custo específico. Portanto, classifiquei como "Outro".		t3_1fm2joz
		t3_1flqn4g	TI é a profissão do futuro?	FALSE			reddit	ti e a profissao do futuro	ti e a profissao do futuro	['ti', 'e', 'a', 'profissao', 'do', 'futuro']	ti e a profissao do futuro	6	Outro	1	6	A pergunta "TI é a profissão do futuro?" não se encaixa diretamente em nenhuma das categorias especificadas, como "O quê", "Por quê", "Quem", "Onde", "Quando", "Como" e "Quanto". É uma pergunta de opinião ou previsão sobre a relevância futura de uma profissão, que não busca uma ação, justificativa específica, localização, identificação de responsável, cronologia, método ou custo. Portanto, não se…		t3_1flqn4g
		t3_1fln5n5	Trocar ou não trocar de vaga? (Zona de conforto)	FALSE			reddit	trocar ou nao trocar de vaga zona de conforto	trocar ou nao trocar de vaga zona de conforto	['trocar', 'ou', 'nao', 'trocar', 'de', 'vaga', 'zona', 'de', 'conforto']	trocar ou nao trocar de vaga zona de conforto	9	O quê	0.777778	7	A pergunta "Trocar ou não trocar de vaga?" busca uma decisão sobre a execução de uma ação específica, ou seja, se deve ou não fazer a ação de trocar de vaga. Isso se enquadra na categoria "O quê", pois está relacionado à identificação e ação a ser executada.		t3_1fln5n5
		t3_1flmg9a	Existe um lugar centralizado com deep-dives em tecnologias?	FALSE			reddit	existe um lugar centralizado com deepdives em tecnologias	existe um lugar centralizado com deepdives em tecnologias	['existe', 'um', 'lugar', 'centralizado', 'com', 'deepdives', 'em', 'tecnologias']	existe um lugar centralizado com deepdives em tecnologias	8	Onde	1	8	A pergunta busca saber se há um local específico ou centralizado onde podem ser encontrados "deep-dives" em tecnologias, indicando uma questão relacionada a um local ou lugar onde buscar informações. Assim, ela se encaixa na categoria "Onde".		t3_1flmg9a
		t3_1fksyxe	Sentem-se mentalmente cansados ?	FALSE			reddit	sentemse mentalmente cansados	sentemse mentalmente cansados	['sentemse', 'mentalmente', 'cansados']	sentemse mentalmente cansados	3	Outro	1	3	A pergunta "Sentem-se mentalmente cansados?" não busca identificar uma ação, justificativa, responsabilidade, localização, cronologia, método ou custo. Em vez disso, ela é uma pergunta direta sobre o estado pessoal ou sentimento de alguém no momento. Portanto, não se encaixa em nenhuma das categorias definidas.		t3_1fksyxe
		t3_1fl4wov	Vale a pena?	FALSE			reddit	vale a pena	vale a pena	['vale', 'a', 'pena']	vale a pena	3	Por quê	1	3	A pergunta "Vale a pena?" busca justificativas ou razões para saber se uma determinada ação ou escolha é vantajosa ou não. A resposta geralmente envolve uma análise das motivações ou objetivos por trás de seguir ou não com uma determinada ação. Portanto, se alinha com a categoria Por quê, que lida com perguntas sobre justificativas ou motivos.		t3_1fl4wov
		t3_1fl32vc	Sou biólogo, vale a pena ser bioinformata ?	FALSE			reddit	sou biologo vale a pena ser bioinformata	sou biologo vale a pena ser bioinformata	['sou', 'biologo', 'vale', 'a', 'pena', 'ser', 'bioinformata']	sou biologo vale a pena ser bioinformata	7	Por quê	1	7	A pergunta "vale a pena ser bioinformata ?" busca uma justificativa ou razão sobre a mudança de profissão, verificando se a troca para bioinformática compensaria, indicando uma busca pela motivação ou objetivo por trás dessa ação.		t3_1fl32vc
		t3_1fl0f20	[🇧🇷] Marketplace de Veículos. Consegue me ajudar?	FALSE			reddit	🇧🇷 marketplace de veiculos consegue me ajudar	🇧🇷 marketplace de veiculos consegue me ajudar	['🇧', '🇷', 'marketplace', 'de', 'veiculos', 'consegue', 'me', 'ajudar']	🇧 🇷 marketplace de veiculos consegue me ajudar	8	Outro	1	8	A pergunta não fornece detalhes suficientes para encaixar em uma das categorias claramente. Ela parece ser uma solicitação de ajuda ou assistência vaga sem especificar o tipo de ajuda necessária (por exemplo, identificação do veículo, sugestão de locais, custo, etc.), portanto, não se encaixa diretamente em nenhuma das categorias fornecidas.		t3_1fl0f20
		t3_1fl3lj9	Linux ou Windows, família?	FALSE			reddit	linux ou windows familia	linux ou windows familia	['linux', 'ou', 'windows', 'familia']	linux ou windows familia	4	Outro	1	4	A pergunta "Linux ou Windows, família?" não busca identificar uma ação a ser executada, uma justificativa, um responsável, um local, um momento cronológico, um método ou um custo. Parece solicitar uma opinião ou preferência entre dois sistemas operacionais que não se enquadra em nenhuma das categorias especificadas. Portanto, é classificada como "Outro".		t3_1fl3lj9
		t3_1fl3eq7	Mentoria realmente muda a situação da pessoa?	FALSE			reddit	mentoria realmente muda a situacao da pessoa	mentoria realmente muda a situacao da pessoa	['mentoria', 'realmente', 'muda', 'a', 'situacao', 'da', 'pessoa']	mentoria realmente muda a situacao da pessoa	7	Por quê	1	7	A pergunta busca saber se a mentoria altera a situação de uma pessoa, implicando uma busca por justificativas ou razões sobre o impacto da mentoria. Isso se encaixa na categoria "Por quê", pois está explorando a motivação ou a razão de essa situação mudar (ou não) em função da mentoria.		t3_1fl3eq7
		t3_1fkmp2g	Fazer EAD só pelo diploma?	FALSE			reddit	fazer ead so pelo diploma	fazer ead so pelo diploma	['fazer', 'ead', 'so', 'pelo', 'diploma']	fazer ead so pelo diploma	5	Por quê	1	5	A pergunta "Fazer EAD só pelo diploma?" busca entender a justificativa ou motivação para fazer EAD (Educação a Distância), questionando se o único objetivo seria obter o diploma. Isso se alinha com a busca por justificativas de algo, o que caracteriza a categoria "Por quê".		t3_1fkmp2g
		t3_1fkydsq	IOS ou ANDROID?	FALSE			reddit	ios ou android	ios ou android	['ios', 'ou', 'android']	ios ou android	3	Outro	1	3	A pergunta "IOS ou ANDROID?" não se enquadra em nenhuma das categorias especificadas, pois não está formulada como uma questão que busca uma ação, justificativa, pessoa, lugar, tempo, método ou custo. Ela parece mais uma solicitação de opinião ou preferência pessoal entre dois sistemas operacionais, sem um contexto que permita categorizá-la adequadamente nas opções fornecidas.		t3_1fkydsq
		t3_1fkktrk	Experiência ou estudo?	FALSE			reddit	experiencia ou estudo	experiencia ou estudo	['experiencia', 'ou', 'estudo']	experiencia ou estudo	3	Outro	1	3	A pergunta "Experiência ou estudo?" parece estar buscando uma comparação ou escolha entre duas opções, mas não especifica claramente uma ação, justificativa, tempo, lugar, pessoa, método ou quantificação. Assim, não se encaixa diretamente em nenhuma das categorias fornecidas, devendo ser classificada como "Outro".		t3_1fkktrk
		t3_1fk09qy	Vocês já trabalharam em alguma empresa que você REALMENTE gostou?	FALSE			reddit	voces ja trabalharam em alguma empresa que voce realmente gostou	voces ja trabalharam em alguma empresa que voce realmente gostou	['voces', 'ja', 'trabalharam', 'em', 'alguma', 'empresa', 'que', 'voce', 'realmente', 'gostou']	voces ja trabalharam em alguma empresa que voce realmente gostou	10	Outro	1	10	A pergunta faz uma indagação sobre uma experiência pessoal ("Vocês já trabalharam em alguma empresa que você REALMENTE gostou?") sem buscar uma ação específica, justificativa, identificação de responsáveis, local, tempo, método, ou custo associado. É uma questão mais subjetiva e pessoal, não se encaixando claramente em nenhuma das categorias descritas.		t3_1fk09qy
		t3_1fk16z1	Websocket ou requisição HTTP padrão?	FALSE			reddit	websocket ou requisicao http padrao	websocket ou requisicao http padrao	['websocket', 'ou', 'requisicao', 'http', 'padrao']	websocket ou requisicao http padrao	5	O quê	1	5	A pergunta "Websocket ou requisição HTTP padrão?" está solicitando uma escolha entre duas opções distintas. Isso se enquadra em uma pergunta que busca identificar qual ação ou método deve ser utilizado, que se alinha com a categoria "O quê", já que está voltada para a identificação de algo.		t3_1fk16z1
		t3_1fkle6d	macbook vale apena?	FALSE			reddit	macbook vale apena	macbook vale apena	['macbook', 'vale', 'apena']	macbook vale apena	3	Por quê	1	3	A pergunta "macbook vale apena?" está buscando uma justificativa ou motivo para considerar a aquisição de um MacBook. A pessoa quer entender se investir em um MacBook é justificado pelas suas vantagens, benefícios, ou valor que ele pode proporcionar, justificando assim a categoria "Por quê".		t3_1fkle6d
		t3_1fklfev	Zé Delivery ou ClickBus?	FALSE			reddit	ze delivery ou clickbus	ze delivery ou clickbus	['ze', 'delivery', 'ou', 'clickbus']	ze delivery ou clickbus	4	Outro	1	4	A pergunta apresenta uma escolha entre duas opções, Zé Delivery ou ClickBus, sem um contexto claro ou uma estrutura interrogativa suficiente para classificá-la em uma das categorias específicas. Não busca uma resposta que se encaixe claramente em ação, justificativa, cronologia, método, localização, responsável ou custo. Assim, está melhor classificada como "Outro".		t3_1fklfev
		t3_1fk7uxu	Medo de voltar a trabalhar e não ser produtivo?	FALSE			reddit	medo de voltar a trabalhar e nao ser produtivo	medo de voltar a trabalhar e nao ser produtivo	['medo', 'de', 'voltar', 'a', 'trabalhar', 'e', 'nao', 'ser', 'produtivo']	medo de voltar a trabalhar e nao ser produtivo	9	Outro	1	9	A pergunta apresentada não se encaixa adequadamente em nenhuma das categorias listadas. Ela parece refletir uma dúvida ou insegurança pessoal, mas não está formulada como uma busca por informação específica ou ação, tampouco se relaciona diretamente a justificativas, localização, tempo, método ou quantidade. Portanto, a classificação mais apropriada seria "Outro".		t3_1fk7uxu
		t3_1fk4mr2	[LinkedIn] Parei de trabalhar e usei esse tempo para terminar a faculdade. Devo explicitar isso?	FALSE			reddit	linkedin parei de trabalhar e usei esse tempo para terminar a faculdade devo explicitar isso	linkedin parei de trabalhar e usei esse tempo para terminar a faculdade devo explicitar isso	['linkedin', 'parei', 'de', 'trabalhar', 'e', 'usei', 'esse', 'tempo', 'para', 'terminar', 'a', 'faculdade', 'devo', 'explicitar', 'isso']	linkedin parei de trabalhar e usei esse tempo para terminar a faculdade devo explicitar isso	15	O quê	1	15	A pergunta busca uma ação a ser executada, especificamente se a pessoa deve explicitar ou não no LinkedIn que interrompeu o trabalho para terminar a faculdade. Ela está buscando uma recomendação sobre qual é a ação correta a tomar em relação à descrição de sua experiência no LinkedIn.		t3_1fk4mr2
		t3_1fk0wq1	No code vale a pena?	FALSE			reddit	no code vale a pena	no code vale a pena	['no', 'code', 'vale', 'a', 'pena']	no code vale a pena	5	O quê	1	5	A pergunta "No code vale a pena?" envolve entender se a abordagem "no code" (ou desenvolvimento sem código) é uma prática recomendada ou eficiente. Está implícita a busca por uma avaliação ou ação sobre o uso ou não dessa metodologia. Assim, está relacionada ao ato de identificar ou determinar o valor ou eficácia de algo, o que se alinha à categoria "O quê".		t3_1fk0wq1
		t3_1fjs7yj	Com dúvidas? Não sabe que faculdade fazer? Leia este post antes de postar no r/brdev	FALSE			reddit	com duvidas nao sabe que faculdade fazer leia este post antes de postar no rbrdev	com duvidas nao sabe que faculdade fazer leia este post antes de postar no rbrdev	['com', 'duvidas', 'nao', 'sabe', 'que', 'faculdade', 'fazer', 'leia', 'este', 'post', 'antes', 'de', 'postar', 'no', 'rbrdev']	com duvidas nao sabe que faculdade fazer leia este post antes de postar no rbrdev	15	Outro	1	15	A pergunta apresentada não se encaixa claramente em nenhuma das categorias fornecidas. Não é uma pergunta direta ou plena de informações suficientes para ser classificada, mas sim uma declaração que direciona o leitor a obter mais informações a partir do post mencionado. É um convite ou uma chamada para ação, mas não uma pergunta que busca uma resposta direta.		t3_1fjs7yj
		t3_1fjzo9e	Boas alternativas para substituir o conhecimento de uma universidade pública?	FALSE			reddit	boas alternativas para substituir o conhecimento de uma universidade publica	boas alternativas para substituir o conhecimento de uma universidade publica	['boas', 'alternativas', 'para', 'substituir', 'o', 'conhecimento', 'de', 'uma', 'universidade', 'publica']	boas alternativas para substituir o conhecimento de uma universidade publica	10	O quê	1	10	A pergunta está buscando alternativas ou substitutos para o conhecimento adquirido em uma universidade pública. A questão é sobre identificar essas alternativas, o que se encaixa na categoria "O quê", pois foca na identificação de algo (as alternativas).		t3_1fjzo9e
		t3_1fjuzgq	Python ou Java?	FALSE			reddit	python ou java	python ou java	['python', 'ou', 'java']	python ou java	3	Outro	1	3	A pergunta "Python ou Java?" não se encaixa claramente em nenhuma das categorias fornecidas. Não há solicitação de ação ou identificação específica ("O quê"), nem motivos ou justificativas sendo buscados ("Por quê"). Não está pedindo informações sobre pessoas ("Quem"), localização ("Onde"), temporalidade ("Quando"), métodos ou estados ("Como"), ou quantificação de recursos ("Quanto"). A pergunta …		t3_1fjuzgq
		t3_1fjv97i	Existe alguma forma de Atrasar a formação sem perder o ProUni ?	FALSE			reddit	existe alguma forma de atrasar a formacao sem perder o prouni	existe alguma forma de atrasar a formacao sem perder o prouni	['existe', 'alguma', 'forma', 'de', 'atrasar', 'a', 'formacao', 'sem', 'perder', 'o', 'prouni']	existe alguma forma de atrasar a formacao sem perder o prouni	11	Como	1	11	A pergunta busca saber de que forma (ou de que maneira) é possível atrasar a formação acadêmica sem perder o benefício do ProUni. Isso se encaixa na categoria "Como" porque envolve saber o método ou procedimento que pode ser seguido para alcançar esse objetivo.		t3_1fjv97i
		t3_1fjs8mb	Querendo trabalhar com Linux, vale a pena?	FALSE			reddit	querendo trabalhar com linux vale a pena	querendo trabalhar com linux vale a pena	['querendo', 'trabalhar', 'com', 'linux', 'vale', 'a', 'pena']	querendo trabalhar com linux vale a pena	7	Por quê	1	7	A pergunta busca uma justificativa ou motivo para trabalhar com Linux, indagando sobre as vantagens ou razões que tornam o trabalho com Linux uma escolha que "vale a pena". Assim, ela se encaixa na categoria "Por quê", que trata de perguntas que buscam justificativas ou motivos.		t3_1fjs8mb
		t3_1fjl8in	Proatividade ou outra coisa?	FALSE			reddit	proatividade ou outra coisa	proatividade ou outra coisa	['proatividade', 'ou', 'outra', 'coisa']	proatividade ou outra coisa	4	O quê	1	4	A pergunta "Proatividade ou outra coisa?" busca identificar ou distinguir entre a proatividade e uma alternativa não especificada, tratando-se de uma questão sobre identificação de atributos ou qualidades. Assim, se encaixa na categoria "O quê" devido à sua natureza de busca de definição ou identificação.		t3_1fjl8in
		t3_1fjjziw	Gain ou Loss!?	FALSE			reddit	gain ou loss	gain ou loss	['gain', 'ou', 'loss']	gain ou loss	3	Outro	1	3	A pergunta "Gain ou Loss!?" não se adequa a nenhuma das categorias especificadas, pois parece ser uma escolha entre duas opções financeiras ou de investimento, mas não busca uma ação, justificativa, responsável, localização, ordem cronológica, método específico ou avaliação de custo. Não fornece contexto suficiente para uma categorização precisa com base nas opções apresentadas.		t3_1fjjziw
		t3_1fjahsz	Atualização sobre o ultimo post que eu fiz	FALSE			reddit	atualizacao sobre o ultimo post que eu fiz	atualizacao sobre o ultimo post que eu fiz	['atualizacao', 'sobre', 'o', 'ultimo', 'post', 'que', 'eu', 'fiz']	atualizacao sobre o ultimo post que eu fiz	8	Outro	1	8	A pergunta "Atualização sobre o ultimo post que eu fiz" não se enquadra especificamente em nenhuma das categorias de perguntas detalhadas (O quê, Por quê, Quem, Onde, Quando, Como, Quanto). Ela parece ser um pedido de atualização ou continuação de algo previamente postado, sem especificar uma das categorias de questionamento.		t3_1fjahsz
		t3_1fjfppc	Não sei se apliquei a Interface de forma correta.	FALSE			reddit	nao sei se apliquei a interface de forma correta	nao sei se apliquei a interface de forma correta	['nao', 'sei', 'se', 'apliquei', 'a', 'interface', 'de', 'forma', 'correta']	nao sei se apliquei a interface de forma correta	9	Como	1	9	A pergunta refere-se à aplicação de uma interface, o que implica no método ou maneira como a ação foi ou será executada. Assim, ela busca saber se o processo foi realizado da maneira correta, enquadrando-se na categoria "Como".		t3_1fjfppc
		t3_1fj93kd	Posso simplesmente ir direto para Spring?	FALSE			reddit	posso simplesmente ir direto para spring	posso simplesmente ir direto para spring	['posso', 'simplesmente', 'ir', 'direto', 'para', 'spring']	posso simplesmente ir direto para spring	6	Como	1	6	A pergunta "Posso simplesmente ir direto para Spring?" implica em questionar o método ou a viabilidade de uma ação - neste caso, a abordagem ou o processo de começar diretamente a usar o framework Spring. Isso se relaciona com a categoria "Como", já que busca entender a forma de proceder em relação a uma ação ou aprendizado específico.		t3_1fj93kd
		t3_1fj6q0x	Consultoria: CNPJ ou CREA?	FALSE			reddit	consultoria cnpj ou crea	consultoria cnpj ou crea	['consultoria', 'cnpj', 'ou', 'crea']	consultoria cnpj ou crea	4	O quê	1	4	A pergunta é sobre a escolha entre CNPJ ou CREA para uma consultoria. Está buscando saber qual entidade ou registro é mais apropriado, o que se alinha com identificar uma ação a ser executada ou o objeto a ser escolhido. Portanto, enquadra-se na categoria "O quê".		t3_1fj6q0x
		t3_1fj1um7	é difícil sair do “nada” ate chegar em Junior?	FALSE			reddit	e dificil sair do nada ate chegar em junior	e dificil sair do nada ate chegar em junior	['e', 'dificil', 'sair', 'do', 'nada', 'ate', 'chegar', 'em', 'junior']	e dificil sair do nada ate chegar em junior	9	Como	1	9	A pergunta "é difícil sair do “nada” ate chegar em Junior?" busca saber sobre o processo ou o método para alcançar uma posição de nível Junior, partindo do "nada", ou seja, entende-se que está explorando as dificuldades e caminhos envolvidos nesse progresso. Assim, ela se enquadra na categoria "Como", que abrange questões relacionadas a métodos e estados de algo.		t3_1fj1um7
		t3_1fim0dk	Para ser junior você tem que ter conhecimento de senior hoje em dia.	FALSE			reddit	para ser junior voce tem que ter conhecimento de senior hoje em dia	para ser junior voce tem que ter conhecimento de senior hoje em dia	['para', 'ser', 'junior', 'voce', 'tem', 'que', 'ter', 'conhecimento', 'de', 'senior', 'hoje', 'em', 'dia']	para ser junior voce tem que ter conhecimento de senior hoje em dia	13	Outro	1	13	A pergunta faz uma afirmação sobre a percepção do nível de conhecimento necessário para ser considerado júnior, mas não é uma pergunta que se enquadra especificamente em nenhuma das categorias fornecidas. Ela não solicita uma ação, não busca justificativas, não pergunta por responsáveis, locais, momentos, métodos ou custos. A falta de um verbo como "é necessário", "por que" ou "o que" deixa a fra…		t3_1fim0dk
		t3_1fj1i2v	Focar em Django para a construção de sistemas web vale a pena?	FALSE			reddit	focar em django para a construcao de sistemas web vale a pena	focar em django para a construcao de sistemas web vale a pena	['focar', 'em', 'django', 'para', 'a', 'construcao', 'de', 'sistemas', 'web', 'vale', 'a', 'pena']	focar em django para a construcao de sistemas web vale a pena	12	Por quê	0.916667	11	A pergunta indaga se concentrar em Django para desenvolver sistemas web é vantajoso, o que busca uma justificativa para validar a decisão de usar ou não Django. Está pedindo uma motivação ou argumento sobre qual a vantagem de utilizar essa tecnologia, ou seja, por que é (ou não) uma boa escolha.		t3_1fj1i2v
		t3_1fipmbg	Oque fazer	FALSE			reddit	oque fazer	oque fazer	['oque', 'fazer']	oque fazer	2	O quê	1	2	A pergunta "O que fazer" busca uma ação a ser executada ou uma solução para um problema, enquadrando-se na categoria "O quê" que lida com ações ou identificações.		t3_1fipmbg
		t3_1filn7w	Respondi essa questão assim!	FALSE			reddit	respondi essa questao assim	respondi essa questao assim	['respondi', 'essa', 'questao', 'assim']	respondi essa questao assim	4	Outro	1	4	A pergunta "Respondi essa questão assim!" não fornece informações suficientes para ser classificada em nenhuma das categorias fornecidas. Não é feita nenhuma pergunta explícita ou implícita para determinar a ação, razão, pessoa, local, tempo, método ou quantidade. Portanto, é adequada a classificação como "Outro".		t3_1filn7w
		t3_1ficiy9	Experiências na Luizalabs?	FALSE			reddit	experiencias na luizalabs	experiencias na luizalabs	['experiencias', 'na', 'luizalabs']	experiencias na luizalabs	3	Outro	1	3	A pergunta "Experiências na Luizalabs?" não se alinha claramente com nenhuma das categorias especificadas (O quê, Por quê, Quem, Onde, Quando, Como, Quanto). Ela parece estar pedindo relatos ou histórias pessoais, sem uma questão específica sobre ação, motivo, responsabilidade, local, tempo, método ou custo. Portanto, a classificação mais adequada é "Outro".		t3_1ficiy9
		t3_1fikdv6	aceito ou não a proposta?	FALSE			reddit	aceito ou nao a proposta	aceito ou nao a proposta	['aceito', 'ou', 'nao', 'a', 'proposta']	aceito ou nao a proposta	5	O quê	1	5	A pergunta "aceito ou não a proposta?" busca identificar qual ação deve ser executada em relação à proposta em questão. A pessoa está buscando decidir qual é a melhor ação a ser tomada: aceitar ou não aceitar. Portanto, está relacionada à busca de uma ação ou decisão específica a ser tomada, encaixando-se na categoria "O quê".		t3_1fikdv6
		t3_1figxeg	WMS é uma área boa pra se seguir?	FALSE			reddit	wms e uma area boa pra se seguir	wms e uma area boa pra se seguir	['wms', 'e', 'uma', 'area', 'boa', 'pra', 'se', 'seguir']	wms e uma area boa pra se seguir	8	O quê	1	8	A pergunta busca uma identificação de algo, especificamente se WMS (Warehouse Management System) é uma área boa para seguir, o que envolve avaliar o campo profissional para decidir se vale a pena investir na carreira nessa área. Portanto, está em busca de uma determinação sobre a qualidade ou adequação dessa área, que se alinha com a busca de identificação ou caracterização típica da categoria "O…		t3_1figxeg
		t3_1fif42i	Vale a pena fazer os projetos do youtube?	FALSE			reddit	vale a pena fazer os projetos do youtube	vale a pena fazer os projetos do youtube	['vale', 'a', 'pena', 'fazer', 'os', 'projetos', 'do', 'youtube']	vale a pena fazer os projetos do youtube	8	Por quê	1	8	A pergunta está buscando uma justificativa ou motivação para realizar os projetos do YouTube, ou seja, busca entender se há um benefício ou razão suficiente para engajar-se nesses projetos.		t3_1fif42i
		t3_1fic7bf	[OC] Usando o brdev pra divulgar meu projeto; Gerador de terreno procedural que eu fiz com minha engine :)	FALSE			reddit	oc usando o brdev pra divulgar meu projeto gerador de terreno procedural que eu fiz com minha engine	oc usando o brdev pra divulgar meu projeto gerador de terreno procedural que eu fiz com minha engine	['oc', 'usando', 'o', 'brdev', 'pra', 'divulgar', 'meu', 'projeto', 'gerador', 'de', 'terreno', 'procedural', 'que', 'eu', 'fiz', 'com', 'minha', 'engine']	oc usando o brdev pra divulgar meu projeto gerador de terreno procedural que eu fiz com minha engine	18	Outro	1	18	A frase apresentada parece ser mais uma declaração ou apresentação do que uma pergunta, pois não há um questionamento direto ou explícito. Ela consiste em um indivíduo divulgando um projeto pessoal, sem solicitar informações adicionais ou explicações. Assim, não se encaixa em nenhuma das categorias pré-definidas para perguntas.		t3_1fic7bf
		t3_1fi3oeb	Sou muito covarde por desistir? Isso vai manchar minha carteira?	FALSE			reddit	sou muito covarde por desistir isso vai manchar minha carteira	sou muito covarde por desistir isso vai manchar minha carteira	['sou', 'muito', 'covarde', 'por', 'desistir', 'isso', 'vai', 'manchar', 'minha', 'carteira']	sou muito covarde por desistir isso vai manchar minha carteira	10	Outro	1	10	A primeira parte da pergunta "Sou muito covarde por desistir?" é subjetiva e pessoal, envolvendo julgamento interno e não se enquadra em nenhuma das categorias estabelecidas, pois não está buscando uma ação, justificativa, pessoa, lugar, tempo, método ou custo específico. A segunda pergunta "Isso vai manchar minha carteira?" refere-se a possíveis consequências de uma decisão pessoal e também não …		t3_1fi3oeb
		t3_1fi8ydx	Flutter para projetos pessoais?	FALSE			reddit	flutter para projetos pessoais	flutter para projetos pessoais	['flutter', 'para', 'projetos', 'pessoais']	flutter para projetos pessoais	4	O quê	1	4	A pergunta "Flutter para projetos pessoais?" está buscando identificar se Flutter é uma boa opção ou recomendação para projetos pessoais. Isso se enquadra na categoria de identificação de algo ou busca de uma ação a ser executada.		t3_1fi8ydx
		t3_1fi8vgu	Saudades do Presencial?	FALSE			reddit	saudades do presencial	saudades do presencial	['saudades', 'do', 'presencial']	saudades do presencial	3	Outro	1	3	A pergunta "Saudades do Presencial?" não se enquadra nas categorias de ação, motivação, responsável, localização, tempo, método ou custo especificados. Não demanda uma resposta objetiva relacionada a ação ou estado, mas sim refere-se a uma expressão emocional ou nostálgica sobre a modalidade presencial de algo (possivelmente trabalho, aula, etc.), que não se encaixa nas categorias oferecidas.		t3_1fi8vgu
		t3_1fi5wmn	é possível passar uma varíavel para dentro da função import()?	FALSE			reddit	e possivel passar uma variavel para dentro da funcao import	e possivel passar uma variavel para dentro da funcao import	['e', 'possivel', 'passar', 'uma', 'variavel', 'para', 'dentro', 'da', 'funcao', 'import']	e possivel passar uma variavel para dentro da funcao import	10	Como	1	10	A pergunta "é possível passar uma varíavel para dentro da função import()?" busca entender o método ou a forma de realizar uma ação específica no contexto de programação, especificamente se é possível modificar a maneira como a função import() recebe variáveis. Portanto, está relacionada a descobrir como realizar ou implementar uma ação.		t3_1fi5wmn
		t3_1fi5tem	Pós em Área que não Atua!	FALSE			reddit	pos em area que nao atua	pos em area que nao atua	['pos', 'em', 'area', 'que', 'nao', 'atua']	pos em area que nao atua	6	Outro	1	6	A pergunta "Pós em Área que não Atua!" é muito vaga e não fornece informações suficientes para determinar a intenção ou o contexto necessário para categorizar adequadamente. Não é apresentada de forma a se enquadrar em nenhuma das categorias específicas fornecidas (O quê, Por quê, Quem, Onde, Quando, Como, Quanto). Não há uma pergunta explícita que possa ser claramente classificada.		t3_1fi5tem
		t3_1fhxq87	Trabalhar com Salesforce tá valendo a pena ainda?	FALSE			reddit	trabalhar com salesforce ta valendo a pena ainda	trabalhar com salesforce ta valendo a pena ainda	['trabalhar', 'com', 'salesforce', 'ta', 'valendo', 'a', 'pena', 'ainda']	trabalhar com salesforce ta valendo a pena ainda	8	Por quê	1	8	A pergunta busca entender a justificativa ou motivação para considerar se trabalhar com Salesforce ainda é vantajoso, implicando uma avaliação sobre as razões pelas quais essa carreira pode valer a pena ou não.		t3_1fhxq87
		t3_1fhx5fc	Eng. de Software ou Eng. de Dados?	FALSE			reddit	eng de software ou eng de dados	eng de software ou eng de dados	['eng', 'de', 'software', 'ou', 'eng', 'de', 'dados']	eng de software ou eng de dados	7	Outro	0.714286	5	A pergunta "Eng. de Software ou Eng. de Dados?" não se enquadra claramente em nenhuma das categorias fornecidas. A questão parece ser uma escolha ou comparação entre duas áreas de atuação, sem explorar ações, causas, responsabilidade, localização, cronologia, métodos ou custos. Portanto, é mais adequado classificá-la como "Outro".		t3_1fhx5fc
		t3_1fhub5g	Java está virando o "novo Javascript"?	FALSE			reddit	java esta virando o novo javascript	java esta virando o novo javascript	['java', 'esta', 'virando', 'o', 'novo', 'javascript']	java esta virando o novo javascript	6	Outro	1	6	A pergunta "Java está virando o 'novo Javascript'?" não se enquadra diretamente em nenhuma das categorias fornecidas. Ela sugere uma comparação ou tendência entre duas linguagens de programação, mas não busca uma ação específica, justificativa, responsável, localização, tempo, método ou custo. A pergunta parece demandar uma opinião ou análise sobre uma possível mudança de status ou uso das lingua…		t3_1fhub5g
		t3_1fhua5l	Criar um SaaS ou trabalhar pra gringa?	FALSE			reddit	criar um saas ou trabalhar pra gringa	criar um saas ou trabalhar pra gringa	['criar', 'um', 'saas', 'ou', 'trabalhar', 'pra', 'gringa']	criar um saas ou trabalhar pra gringa	7	O quê	1	7	A pergunta "Criar um SaaS ou trabalhar pra gringa?" está solicitando uma escolha entre duas ações possíveis: criar um Software as a Service (SaaS) ou trabalhar para uma empresa estrangeira ("gringa"). A natureza da pergunta está centrada em identificar qual ação deve ser executada ou escolhida entre as opções apresentadas. Portanto, ela se enquadra na categoria "O quê", pois está focada em determ…		t3_1fhua5l
		t3_1fhdeb5	Já desenvolveram com esse tipo de pessoa?	FALSE			reddit	ja desenvolveram com esse tipo de pessoa	ja desenvolveram com esse tipo de pessoa	['ja', 'desenvolveram', 'com', 'esse', 'tipo', 'de', 'pessoa']	ja desenvolveram com esse tipo de pessoa	7	Quem	1	7	A pergunta "Já desenvolveram com esse tipo de pessoa?" busca identificar quem são as pessoas com as quais o desenvolvimento foi feito, ou quem é o tipo de pessoa na questão. Portanto, a categoria "Quem" é a mais apropriada.		t3_1fhdeb5
		t3_1fhlh3x	Vocês sabem sobre base de dados de perguntas pra quiz? Tipo jogo milhão, etc?	FALSE			reddit	voces sabem sobre base de dados de perguntas pra quiz tipo jogo milhao etc	voces sabem sobre base de dados de perguntas pra quiz tipo jogo milhao etc	['voces', 'sabem', 'sobre', 'base', 'de', 'dados', 'de', 'perguntas', 'pra', 'quiz', 'tipo', 'jogo', 'milhao', 'etc']	voces sabem sobre base de dados de perguntas pra quiz tipo jogo milhao etc	14	O quê	0.928571	13	A pergunta está buscando informações sobre bases de dados específicas para perguntas de quiz, como em jogos do tipo "jogo milhão". Isso se refere a identificar algo específico, que são essas bases de dados, o que encaixa na categoria "O quê".		t3_1fhlh3x
		t3_1fhlul4	Quero montar um app e website de inventário de produtos	FALSE			reddit	quero montar um app e website de inventario de produtos	quero montar um app e website de inventario de produtos	['quero', 'montar', 'um', 'app', 'e', 'website', 'de', 'inventario', 'de', 'produtos']	quero montar um app e website de inventario de produtos	10	O quê	0.9	9	A pergunta expressa uma intenção de desenvolver um aplicativo e um website para gerenciamento de inventário de produtos, o que caracteriza uma ação ou projeto que a pessoa quer executar. Portanto, a categoria mais apropriada é "O quê", pois envolve identificar a ação desejada (neste caso, criar um app e website).		t3_1fhlul4
		t3_1fhk55f	Dois reais ou uma startup misteriosa?	FALSE			reddit	dois reais ou uma startup misteriosa	dois reais ou uma startup misteriosa	['dois', 'reais', 'ou', 'uma', 'startup', 'misteriosa']	dois reais ou uma startup misteriosa	6	Outro	1	6	A pergunta "Dois reais ou uma startup misteriosa?" não se encaixa claramente em nenhuma das categorias padrão fornecidas. Ela não busca uma ação, justificativa, responsável, localização, momento, método ou custo específico. A pergunta parece estar pedindo por uma escolha ou preferência entre duas opções, mas carece de contexto suficiente para ser categorizada nas opções listadas, portanto, é clas…		t3_1fhk55f
		t3_1fhcmqs	Antes da OpenAI anunciar uma IA que dizem ser capaz de pensar, o Prolog já não fazia isso?	FALSE			reddit	antes da openai anunciar uma ia que dizem ser capaz de pensar o prolog ja nao fazia isso	antes da openai anunciar uma ia que dizem ser capaz de pensar o prolog ja nao fazia isso	['antes', 'da', 'openai', 'anunciar', 'uma', 'ia', 'que', 'dizem', 'ser', 'capaz', 'de', 'pensar', 'o', 'prolog', 'ja', 'nao', 'fazia', 'isso']	antes da openai anunciar uma ia que dizem ser capaz de pensar o prolog ja nao fazia isso	18	O quê	1	18	A pergunta questiona sobre a capacidade de uma linguagem de programação (Prolog) em relação a uma habilidade específica (pensar) que uma IA anunciada pela OpenAI também afirma ter. Está buscando identificar se uma capacidade atribuída à IA já era um atributo de algo preexistente, o que se encaixa na categoria "O quê" ao discutir a identificação de funcionalidades ou características.		t3_1fhcmqs
		t3_1fh2qa4	Existem empresas que têm um trabalho mais difícil que outras?	FALSE			reddit	existem empresas que tem um trabalho mais dificil que outras	existem empresas que tem um trabalho mais dificil que outras	['existem', 'empresas', 'que', 'tem', 'um', 'trabalho', 'mais', 'dificil', 'que', 'outras']	existem empresas que tem um trabalho mais dificil que outras	10	O quê	0.9	9	A pergunta busca identificar se há empresas que possuem um "trabalho mais difícil" em comparação a outras. Portanto, está identificando uma característica ou condição relacionada ao trabalho, o que se alinha com a categoria "O quê", que é usada para perguntas que buscam identificar algo, uma ação ou uma característica de algo.		t3_1fh2qa4
		t3_1fgnlgw	Vale a pena ir pra área de dev?	FALSE			reddit	vale a pena ir pra area de dev	vale a pena ir pra area de dev	['vale', 'a', 'pena', 'ir', 'pra', 'area', 'de', 'dev']	vale a pena ir pra area de dev	8	Por quê	1	8	A pergunta "Vale a pena ir pra área de dev?" busca uma justificativa ou motivação sobre se é vantajoso ou não seguir a carreira de desenvolvimento (dev). Isso implica em querer entender os benefícios ou razões para entrar nesse campo, encaixando-se na categoria "Por quê".		t3_1fgnlgw
		t3_1fgh625	Ajuda com desafio técnico em Java/Spring para vaga de Dev Júnior – dicas?	FALSE			reddit	ajuda com desafio tecnico em javaspring para vaga de dev junior dicas	ajuda com desafio tecnico em javaspring para vaga de dev junior dicas	['ajuda', 'com', 'desafio', 'tecnico', 'em', 'javaspring', 'para', 'vaga', 'de', 'dev', 'junior', 'dicas']	ajuda com desafio tecnico em javaspring para vaga de dev junior dicas	12	O quê	1	12	A pergunta está pedindo por dicas ou orientações para lidar com um desafio técnico específico em Java/Spring relacionado a uma vaga de desenvolvedor júnior. Isso se encaixa na busca por uma ação ou solução relacionada a esse desafio, alinhando-se com a categoria "O quê".		t3_1fgh625
		t3_1fg8qjp	Testes gringos fazem sentido?	FALSE			reddit	testes gringos fazem sentido	testes gringos fazem sentido	['testes', 'gringos', 'fazem', 'sentido']	testes gringos fazem sentido	4	Por quê	1	4	A pergunta "Testes gringos fazem sentido?" busca entender a justificativa ou a motivação por trás da utilização de testes estrangeiros, questionando a lógica ou o propósito de tais testes serem relevantes ou aplicáveis. Assim, ela se enquadra na categoria "Por quê", que se refere a perguntas que procuram justificativas ou razões para algo.		t3_1fg8qjp
		t3_1fg8c9k	Alguém já passou por isso?	FALSE			reddit	alguem ja passou por isso	alguem ja passou por isso	['alguem', 'ja', 'passou', 'por', 'isso']	alguem ja passou por isso	5	Outro	1	5	A pergunta "Alguém já passou por isso?" não se encaixa claramente em nenhuma das categorias fornecidas. Ela não busca ação, justificativa, identificação de pessoa responsável, localização, cronologia, método, ou custo. Ao invés disso, a pergunta está perguntando sobre a experiência de outros indivíduos, o que não é capturado por nenhuma das categorias específicas definidas.		t3_1fg8c9k
		t3_1fg8s15	Stripe é um bom gateway de pagamentos?	FALSE			reddit	stripe e um bom gateway de pagamentos	stripe e um bom gateway de pagamentos	['stripe', 'e', 'um', 'bom', 'gateway', 'de', 'pagamentos']	stripe e um bom gateway de pagamentos	7	O quê	1	7	A pergunta está buscando identificar ou qualificar algo específico, no caso, um gateway de pagamentos, para entender se ele é uma boa opção. Ela está pedindo uma avaliação ou identificação sobre a qualidade ou adequação da Stripe como um gateway de pagamentos. Esta é uma característica típica das perguntas da categoria "O quê".		t3_1fg8s15
		t3_1ffmo24	Bons desenvolvedores que não sabem vender	FALSE			reddit	bons desenvolvedores que nao sabem vender	bons desenvolvedores que nao sabem vender	['bons', 'desenvolvedores', 'que', 'nao', 'sabem', 'vender']	bons desenvolvedores que nao sabem vender	6	Outro	1	6	A frase "Bons desenvolvedores que não sabem vender" não possui uma estrutura de pergunta. Não há informações suficientes para classificá-la em uma das categorias de pergunta propostas, pois não indica uma busca por ação, justificativa, identificação de responsável, local, tempo, método ou custo. É uma afirmação ou uma observação que pode estar relacionada a uma discussão ou tópico mais amplo, mas…		t3_1ffmo24
		t3_1fft2j5	Deixar xp curta no currículo/linkedin?	FALSE			reddit	deixar xp curta no curriculolinkedin	deixar xp curta no curriculolinkedin	['deixar', 'xp', 'curta', 'no', 'curriculolinkedin']	deixar xp curta no curriculolinkedin	5	O quê	1	5	A pergunta "Deixar xp curta no currículo/linkedin?" busca entender qual ação deve ser tomada em relação à inclusão de experiências profissionais curtas no currículo ou LinkedIn, ou seja, está relacionada a uma decisão ou ação específica a ser executada sobre o conteúdo do currículo.		t3_1fft2j5
		t3_1fg00hq	Dev R$ 100K/mês na gringa, vocês existem?	FALSE			reddit	dev r$ 100kmes na gringa voces existem	dev r$ 100kmes na gringa voces existem	['dev', 'r$', '100kmes', 'na', 'gringa', 'voces', 'existem']	dev r$ 100kmes na gringa voces existem	7	Outro	1	7	A pergunta "Dev R$ 100K/mês na gringa, vocês existem?" não se encaixa claramente em nenhuma das categorias especificadas. A pergunta sugere questionamento sobre a existência de desenvolvedores que ganham R$ 100K/mês fora do Brasil, mas não fica claro se busca identificar uma ação, justificativa, localização, tempo, método, custo ou responsável, encaixando-se mais em uma busca por confirmação da e…		t3_1fg00hq
		t3_1ffvuxt	O valor do meu salario é justo para o mercado atual?	FALSE			reddit	o valor do meu salario e justo para o mercado atual	o valor do meu salario e justo para o mercado atual	['o', 'valor', 'do', 'meu', 'salario', 'e', 'justo', 'para', 'o', 'mercado', 'atual']	o valor do meu salario e justo para o mercado atual	11	Quanto	0.909091	10	A pergunta envolve a avaliação do valor do salário em relação ao mercado atual, o que está relacionado a custo financeiro. Ela busca determinar se o montante que está sendo pago é adequado ou justo em comparação com padrões semelhantes no mercado, caracterizando uma questão de "quanto".		t3_1ffvuxt
		t3_1fg0jdq	Vale a pena começar pelo mercado Mobile (Android)?	FALSE			reddit	vale a pena comecar pelo mercado mobile android	vale a pena comecar pelo mercado mobile android	['vale', 'a', 'pena', 'comecar', 'pelo', 'mercado', 'mobile', 'android']	vale a pena comecar pelo mercado mobile android	8	Por quê	1	8	A pergunta "Vale a pena começar pelo mercado Mobile (Android)?" busca saber a justificativa ou os motivos para iniciar ou não uma carreira/concentração no mercado Mobile, especificamente Android. A pessoa pergunta se há vantagens ou razões para iniciar com essa escolha, o que se alinha com a busca por justificativas ou motivações.		t3_1fg0jdq
		t3_1ffvry7	Python no backend vem crescendo?	FALSE			reddit	python no backend vem crescendo	python no backend vem crescendo	['python', 'no', 'backend', 'vem', 'crescendo']	python no backend vem crescendo	5	Outro	1	5	A pergunta "Python no backend vem crescendo?" não se encaixa perfeitamente em nenhuma das categorias fornecidas. Ela parece ser uma pergunta aberta, buscando informação ou opinião sobre uma tendência no uso de Python no desenvolvimento backend, sem se fixar especificamente em quem, onde, quando, como, por quê, quanto ou um quê específico.		t3_1ffvry7
		t3_1ffvc0r	Vale a pena investir em Cibersegurança?	FALSE			reddit	vale a pena investir em ciberseguranca	vale a pena investir em ciberseguranca	['vale', 'a', 'pena', 'investir', 'em', 'ciberseguranca']	vale a pena investir em ciberseguranca	6	Por quê	1	6	A pergunta busca justificativas ou razões para investir em Cibersegurança, questionando sobre a motivação ou o objetivo de tal investimento ser vantajoso ou não.		t3_1ffvc0r
		t3_1ffcf51	O caminho para o primeiro emprego é JAVA?	FALSE			reddit	o caminho para o primeiro emprego e java	o caminho para o primeiro emprego e java	['o', 'caminho', 'para', 'o', 'primeiro', 'emprego', 'e', 'java']	o caminho para o primeiro emprego e java	8	O quê			CATEGORIA: O quê		t3_1ffcf51
		t3_1ffb34n	Vocês também tem dificuldade em "se vender" na entrevista?	FALSE			reddit	voces tambem tem dificuldade em se vender na entrevista	voces tambem tem dificuldade em se vender na entrevista	['voces', 'tambem', 'tem', 'dificuldade', 'em', 'se', 'vender', 'na', 'entrevista']	voces tambem tem dificuldade em se vender na entrevista	9	Como			CATEGORIA: Como		t3_1ffb34n
		t3_1ff6ztl	Queria uma opinião de vocês overemployed com estágio	FALSE			reddit	queria uma opiniao de voces overemployed com estagio	queria uma opiniao de voces overemployed com estagio	['queria', 'uma', 'opiniao', 'de', 'voces', 'overemployed', 'com', 'estagio']	queria uma opiniao de voces overemployed com estagio	8	Outro			CATEGORIA: Outro		t3_1ff6ztl
		t3_1ffahdq	Integração com o BigQuery	FALSE			reddit	integracao com o bigquery	integracao com o bigquery	['integracao', 'com', 'o', 'bigquery']	integracao com o bigquery	4	Outro			CATEGORIA: Outro		t3_1ffahdq
		t3_1ff5zx0	Devo voltar para o meu antigo emprego depois de 1 mês na consultoria atual?	FALSE			reddit	devo voltar para o meu antigo emprego depois de 1 mes na consultoria atual	devo voltar para o meu antigo emprego depois de 1 mes na consultoria atual	['devo', 'voltar', 'para', 'o', 'meu', 'antigo', 'emprego', 'depois', 'de', '1', 'mes', 'na', 'consultoria', 'atual']	devo voltar para o meu antigo emprego depois de 1 mes na consultoria atual	14	O quê			CATEGORIA: O quê		t3_1ff5zx0
		t3_1ff4rq4	Bom vamos la, tenho 22 anos e no momento trabalho com area de produção em uma empresa textil, e queria mudar pra area da programação.	FALSE			reddit	bom vamos la tenho 22 anos e no momento trabalho com area de producao em uma empresa textil e queria mudar pra area da programacao	bom vamos la tenho 22 anos e no momento trabalho com area de producao em uma empresa textil e queria mudar pra area da programacao	['bom', 'vamos', 'la', 'tenho', '22', 'anos', 'e', 'no', 'momento', 'trabalho', 'com', 'area', 'de', 'producao', 'em', 'uma', 'empresa', 'textil', 'e', 'queria', 'mudar', 'pra', 'area', 'da', 'programacao']	bom vamos la tenho 22 anos e no momento trabalho com area de producao em uma empresa textil e queria mudar pra area da programacao	25	Outro			CATEGORIA: Outro		t3_1ff4rq4
		t3_1ff0uth	Consegui entrevista, mas não me sinto preparado. Alguma dica?	FALSE			reddit	consegui entrevista mas nao me sinto preparado alguma dica	consegui entrevista mas nao me sinto preparado alguma dica	['consegui', 'entrevista', 'mas', 'nao', 'me', 'sinto', 'preparado', 'alguma', 'dica']	consegui entrevista mas nao me sinto preparado alguma dica	9	Como			CATEGORIA: Como		t3_1ff0uth
		t3_1fewqib	Criei meu portfólio pessoal e queria opiniões	FALSE			reddit	criei meu portfolio pessoal e queria opinioes	criei meu portfolio pessoal e queria opinioes	['criei', 'meu', 'portfolio', 'pessoal', 'e', 'queria', 'opinioes']	criei meu portfolio pessoal e queria opinioes	7	O quê			CATEGORIA: O quê		t3_1fewqib
		t3_1fedlrq	Já viram alguém ser demitido por incompetência?	FALSE			reddit	ja viram alguem ser demitido por incompetencia	ja viram alguem ser demitido por incompetencia	['ja', 'viram', 'alguem', 'ser', 'demitido', 'por', 'incompetencia']	ja viram alguem ser demitido por incompetencia	7	Quem			CATEGORIA: Quem		t3_1fedlrq
		t3_1fepqfa	Existe estragar carreira por movimentar para outra empresa?	FALSE			reddit	existe estragar carreira por movimentar para outra empresa	existe estragar carreira por movimentar para outra empresa	['existe', 'estragar', 'carreira', 'por', 'movimentar', 'para', 'outra', 'empresa']	existe estragar carreira por movimentar para outra empresa	8	O quê			CATEGORIA: O quê		t3_1fepqfa
		t3_1fe1k7l	I.A's generativas estão realmente entregando algum valor real?	FALSE			reddit	ias generativas estao realmente entregando algum valor real	ias generativas estao realmente entregando algum valor real	['ias', 'generativas', 'estao', 'realmente', 'entregando', 'algum', 'valor', 'real']	ias generativas estao realmente entregando algum valor real	8	O quê			CATEGORIA: O quê		t3_1fe1k7l
		t3_1fe74v4	Certificação de linguagem de programação (framework e etc tbm) vale a pena?	FALSE			reddit	certificacao de linguagem de programacao framework e etc tbm vale a pena	certificacao de linguagem de programacao framework e etc tbm vale a pena	['certificacao', 'de', 'linguagem', 'de', 'programacao', 'framework', 'e', 'etc', 'tbm', 'vale', 'a', 'pena']	certificacao de linguagem de programacao framework e etc tbm vale a pena	12	Por quê			CATEGORIA: Por quê		t3_1fe74v4
		t3_1femza3	Vale a pena criar uma solução de IA self-hosted para gerar voz/vídeo, ou os custos são muito altos?	FALSE			reddit	vale a pena criar uma solucao de ia selfhosted para gerar vozvideo ou os custos sao muito altos	vale a pena criar uma solucao de ia selfhosted para gerar vozvideo ou os custos sao muito altos	['vale', 'a', 'pena', 'criar', 'uma', 'solucao', 'de', 'ia', 'selfhosted', 'para', 'gerar', 'vozvideo', 'ou', 'os', 'custos', 'sao', 'muito', 'altos']	vale a pena criar uma solucao de ia selfhosted para gerar vozvideo ou os custos sao muito altos	18	Quanto			CATEGORIA: Quanto		t3_1femza3
		t3_1fem4vi	Algum de vocês já trabalhou com python no QGIS? Contem as experiências	FALSE			reddit	algum de voces ja trabalhou com python no qgis contem as experiencias	algum de voces ja trabalhou com python no qgis contem as experiencias	['algum', 'de', 'voces', 'ja', 'trabalhou', 'com', 'python', 'no', 'qgis', 'contem', 'as', 'experiencias']	algum de voces ja trabalhou com python no qgis contem as experiencias	12	Quem			CATEGORIA: Quem		t3_1fem4vi
		t3_1fe7a5k	Alguém criou um app ou software e não consegue vender?	FALSE			reddit	alguem criou um app ou software e nao consegue vender	alguem criou um app ou software e nao consegue vender	['alguem', 'criou', 'um', 'app', 'ou', 'software', 'e', 'nao', 'consegue', 'vender']	alguem criou um app ou software e nao consegue vender	10	Quem			CATEGORIA: Quem		t3_1fe7a5k
		t3_1fel4n3	Trabalhar com programação afeta muito a visão?	FALSE			reddit	trabalhar com programacao afeta muito a visao	trabalhar com programacao afeta muito a visao	['trabalhar', 'com', 'programacao', 'afeta', 'muito', 'a', 'visao']	trabalhar com programacao afeta muito a visao	7	Quanto			CATEGORIA: Quanto		t3_1fel4n3
		t3_1feg8xh	Entrega de código-fonte antes ou depois da homologação?	FALSE			reddit	entrega de codigofonte antes ou depois da homologacao	entrega de codigofonte antes ou depois da homologacao	['entrega', 'de', 'codigofonte', 'antes', 'ou', 'depois', 'da', 'homologacao']	entrega de codigofonte antes ou depois da homologacao	8	Quando			CATEGORIA: Quando		t3_1feg8xh
		t3_1fe8l4u	Desenvolvimento de jogos ?	FALSE			reddit	desenvolvimento de jogos	desenvolvimento de jogos	['desenvolvimento', 'de', 'jogos']	desenvolvimento de jogos	3	Outro			CATEGORIA: Outro		t3_1fe8l4u
		t3_1fecpee	Quero sair do call center e voltar para a TI	FALSE			reddit	quero sair do call center e voltar para a ti	quero sair do call center e voltar para a ti	['quero', 'sair', 'do', 'call', 'center', 'e', 'voltar', 'para', 'a', 'ti']	quero sair do call center e voltar para a ti	10	O quê			CATEGORIA: O quê		t3_1fecpee
		t3_1fed7tn	Javascript simplificado?	FALSE			reddit	javascript simplificado	javascript simplificado	['javascript', 'simplificado']	javascript simplificado	2	Outro			CATEGORIA: Outro		t3_1fed7tn
		t3_1fdww7u	Nova empresa, furada ou coisa boa?	FALSE			reddit	nova empresa furada ou coisa boa	nova empresa furada ou coisa boa	['nova', 'empresa', 'furada', 'ou', 'coisa', 'boa']	nova empresa furada ou coisa boa	6	O quê			CATEGORIA: O quê		t3_1fdww7u
		t3_1fe9ivr	Com dúvidas? Não sabe que faculdade fazer? Leia este post antes de postar no r/brdev	FALSE			reddit	com duvidas nao sabe que faculdade fazer leia este post antes de postar no rbrdev	com duvidas nao sabe que faculdade fazer leia este post antes de postar no rbrdev	['com', 'duvidas', 'nao', 'sabe', 'que', 'faculdade', 'fazer', 'leia', 'este', 'post', 'antes', 'de', 'postar', 'no', 'rbrdev']	com duvidas nao sabe que faculdade fazer leia este post antes de postar no rbrdev	15	Outro			CATEGORIA: Outro		t3_1fe9ivr
		t3_1fdyhjm	32 anos, ainda dá tempo ?	FALSE			reddit	32 anos ainda da tempo	32 anos ainda da tempo	['32', 'anos', 'ainda', 'da', 'tempo']	32 anos ainda da tempo	5	Outro			CATEGORIA: Outro		t3_1fdyhjm
		t3_1fe1ywy	vale a pena ser indicado pra vaga de sênior sendo q sou júnior/trainee?	FALSE			reddit	vale a pena ser indicado pra vaga de senior sendo q sou juniortrainee	vale a pena ser indicado pra vaga de senior sendo q sou juniortrainee	['vale', 'a', 'pena', 'ser', 'indicado', 'pra', 'vaga', 'de', 'senior', 'sendo', 'q', 'sou', 'juniortrainee']	vale a pena ser indicado pra vaga de senior sendo q sou juniortrainee	13	Por quê			CATEGORIA: Por quê		t3_1fe1ywy
		t3_1fdt51s	Estou sendo negligente com minha carreira?	FALSE			reddit	estou sendo negligente com minha carreira	estou sendo negligente com minha carreira	['estou', 'sendo', 'negligente', 'com', 'minha', 'carreira']	estou sendo negligente com minha carreira	6	O quê			CATEGORIA: O quê		t3_1fdt51s
		t3_1fdv6rc	Focar em outra graduação ou em programação?	FALSE			reddit	focar em outra graduacao ou em programacao	focar em outra graduacao ou em programacao	['focar', 'em', 'outra', 'graduacao', 'ou', 'em', 'programacao']	focar em outra graduacao ou em programacao	7	O quê			CATEGORIA: O quê		t3_1fdv6rc
		t3_1fdlk9d	Quero ralar peito do Brasil em 2025	FALSE			reddit	quero ralar peito do brasil em 2025	quero ralar peito do brasil em 2025	['quero', 'ralar', 'peito', 'do', 'brasil', 'em', '2025']	quero ralar peito do brasil em 2025	7	Quando			CATEGORIA: Quando		t3_1fdlk9d
		t3_1fdl33b	Algum servidor público aqui?	FALSE			reddit	algum servidor publico aqui	algum servidor publico aqui	['algum', 'servidor', 'publico', 'aqui']	algum servidor publico aqui	4	Quem			CATEGORIA: Quem		t3_1fdl33b
		t3_1fdgxm4	É doideira estudar várias áreas?	FALSE			reddit	e doideira estudar varias areas	e doideira estudar varias areas	['e', 'doideira', 'estudar', 'varias', 'areas']	e doideira estudar varias areas	5	Outro			CATEGORIA: Outro		t3_1fdgxm4
		t3_1fdhiwp	Migrar de área, vale a pena?	FALSE			reddit	migrar de area vale a pena	migrar de area vale a pena	['migrar', 'de', 'area', 'vale', 'a', 'pena']	migrar de area vale a pena	6	Por quê			CATEGORIA: Por quê		t3_1fdhiwp
		t3_1fd873m	2a Graduação ou Pós?	FALSE			reddit	2a graduacao ou pos	2a graduacao ou pos	['2a', 'graduacao', 'ou', 'pos']	2a graduacao ou pos	4	Outro			CATEGORIA: Outro		t3_1fd873m
		t3_1fd7idu	Aceitaria ou não?	FALSE			reddit	aceitaria ou nao	aceitaria ou nao	['aceitaria', 'ou', 'nao']	aceitaria ou nao	3	Outro			CATEGORIA: Outro		t3_1fd7idu
		t3_1fd5zkp	Pessoas que trabalham em multinacionais	FALSE			reddit	pessoas que trabalham em multinacionais	pessoas que trabalham em multinacionais	['pessoas', 'que', 'trabalham', 'em', 'multinacionais']	pessoas que trabalham em multinacionais	5	Outro			CATEGORIA: Outro		t3_1fd5zkp
		t3_1fd5uqo	Faz sentido matemática computacional p trabalhar com TI?	FALSE			reddit	faz sentido matematica computacional p trabalhar com ti	faz sentido matematica computacional p trabalhar com ti	['faz', 'sentido', 'matematica', 'computacional', 'p', 'trabalhar', 'com', 'ti']	faz sentido matematica computacional p trabalhar com ti	8	Por quê			CATEGORIA: Por quê		t3_1fd5uqo
		t3_1fcy50a	Vaga que não possuo experiência	FALSE			reddit	vaga que nao possuo experiencia	vaga que nao possuo experiencia	['vaga', 'que', 'nao', 'possuo', 'experiencia']	vaga que nao possuo experiencia	5	Outro			CATEGORIA: Outro		t3_1fcy50a
		t3_1fcyij1	Ao sair de uma empresa, é errado levar alguns códigos ou algoritmos consigo para base de conhecimento pessoal?	FALSE			reddit	ao sair de uma empresa e errado levar alguns codigos ou algoritmos consigo para base de conhecimento pessoal	ao sair de uma empresa e errado levar alguns codigos ou algoritmos consigo para base de conhecimento pessoal	['ao', 'sair', 'de', 'uma', 'empresa', 'e', 'errado', 'levar', 'alguns', 'codigos', 'ou', 'algoritmos', 'consigo', 'para', 'base', 'de', 'conhecimento', 'pessoal']	ao sair de uma empresa e errado levar alguns codigos ou algoritmos consigo para base de conhecimento pessoal	18	O quê			CATEGORIA: O quê		t3_1fcyij1
		t3_1fcxxfn	Visualg para iPad ou algum site?	FALSE			reddit	visualg para ipad ou algum site	visualg para ipad ou algum site	['visualg', 'para', 'ipad', 'ou', 'algum', 'site']	visualg para ipad ou algum site	6	O quê			CATEGORIA: O quê		t3_1fcxxfn
		t3_1fcw749	Alguém tem recomendação de cursos de UI/UX gratuito?	FALSE			reddit	alguem tem recomendacao de cursos de uiux gratuito	alguem tem recomendacao de cursos de uiux gratuito	['alguem', 'tem', 'recomendacao', 'de', 'cursos', 'de', 'uiux', 'gratuito']	alguem tem recomendacao de cursos de uiux gratuito	8	Onde			CATEGORIA: Onde		t3_1fcw749
		t3_1fco8sn	[CHOQUE DE GERAÇÕES] Diferenças gritantes	FALSE			reddit	choque de geracoes diferencas gritantes	choque de geracoes diferencas gritantes	['choque', 'de', 'geracoes', 'diferencas', 'gritantes']	choque de geracoes diferencas gritantes	5	Outro			CATEGORIA: Outro		t3_1fco8sn
		t3_1fcnvyh	estou indo pelo caminho certo?	FALSE			reddit	estou indo pelo caminho certo	estou indo pelo caminho certo	['estou', 'indo', 'pelo', 'caminho', 'certo']	estou indo pelo caminho certo	5	Outro			CATEGORIA: Outro		t3_1fcnvyh
		t3_1fcdowb	A Comunidade Está Sabotando Novos Desenvolvedores?	FALSE			reddit	a comunidade esta sabotando novos desenvolvedores	a comunidade esta sabotando novos desenvolvedores	['a', 'comunidade', 'esta', 'sabotando', 'novos', 'desenvolvedores']	a comunidade esta sabotando novos desenvolvedores	6	O quê			CATEGORIA: O quê		t3_1fcdowb
		t3_1fc5dyv	Demitido por tentar dar um passo maior que a perna	FALSE			reddit	demitido por tentar dar um passo maior que a perna	demitido por tentar dar um passo maior que a perna	['demitido', 'por', 'tentar', 'dar', 'um', 'passo', 'maior', 'que', 'a', 'perna']	demitido por tentar dar um passo maior que a perna	10	Outro			CATEGORIA: Outro		t3_1fc5dyv
		t3_1fcdojh	Alguém se arrepende de ter feito Engenharia de software?	FALSE			reddit	alguem se arrepende de ter feito engenharia de software	alguem se arrepende de ter feito engenharia de software	['alguem', 'se', 'arrepende', 'de', 'ter', 'feito', 'engenharia', 'de', 'software']	alguem se arrepende de ter feito engenharia de software	9	Quem			CATEGORIA: Quem		t3_1fcdojh
		t3_1fcezoc	Data Bricks Vale a Pena ? (Eng. De dados)	FALSE			reddit	data bricks vale a pena eng de dados	data bricks vale a pena eng de dados	['data', 'bricks', 'vale', 'a', 'pena', 'eng', 'de', 'dados']	data bricks vale a pena eng de dados	8	Por quê			CATEGORIA: Por quê		t3_1fcezoc
		t3_1fcmef9	Estágio Home-office ou Freelance?	FALSE			reddit	estagio homeoffice ou freelance	estagio homeoffice ou freelance	['estagio', 'homeoffice', 'ou', 'freelance']	estagio homeoffice ou freelance	4	O quê			CATEGORIA: O quê		t3_1fcmef9
		t3_1fckqcm	É difícil conseguir estágio mesmo por segunda graduação?	FALSE			reddit	e dificil conseguir estagio mesmo por segunda graduacao	e dificil conseguir estagio mesmo por segunda graduacao	['e', 'dificil', 'conseguir', 'estagio', 'mesmo', 'por', 'segunda', 'graduacao']	e dificil conseguir estagio mesmo por segunda graduacao	8	Como			CATEGORIA: Como		t3_1fckqcm
		t3_1fc4746	Existe paz na vida da T.I. ?	FALSE			reddit	existe paz na vida da ti	existe paz na vida da ti	['existe', 'paz', 'na', 'vida', 'da', 'ti']	existe paz na vida da ti	6	Outro			CATEGORIA: Outro		t3_1fc4746
		t3_1fc89g8	Recomendação de serviços de armazenamento em nuvem?	FALSE			reddit	recomendacao de servicos de armazenamento em nuvem	recomendacao de servicos de armazenamento em nuvem	['recomendacao', 'de', 'servicos', 'de', 'armazenamento', 'em', 'nuvem']	recomendacao de servicos de armazenamento em nuvem	7	O quê			CATEGORIA: O quê		t3_1fc89g8
		t3_1fbx16v	Projetos que chamam atenção de big techs	FALSE			reddit	projetos que chamam atencao de big techs	projetos que chamam atencao de big techs	['projetos', 'que', 'chamam', 'atencao', 'de', 'big', 'techs']	projetos que chamam atencao de big techs	7	O quê			CATEGORIA: O quê		t3_1fbx16v
		t3_1fbw3on	10 meses estagiando e agora?	FALSE			reddit	10 meses estagiando e agora	10 meses estagiando e agora	['10', 'meses', 'estagiando', 'e', 'agora']	10 meses estagiando e agora	5	O quê			CATEGORIA: O quê		t3_1fbw3on
		t3_1fbud7c	Vou começar a faculdade semana que vem	FALSE			reddit	vou comecar a faculdade semana que vem	vou comecar a faculdade semana que vem	['vou', 'comecar', 'a', 'faculdade', 'semana', 'que', 'vem']	vou comecar a faculdade semana que vem	7	Outro			CATEGORIA: Outro		t3_1fbud7c
		t3_1fcgafa	Você já subiu código em produção fora do padrão só porque não sabia outra forma de resolver?	FALSE			reddit	voce ja subiu codigo em producao fora do padrao so porque nao sabia outra forma de resolver	voce ja subiu codigo em producao fora do padrao so porque nao sabia outra forma de resolver	['voce', 'ja', 'subiu', 'codigo', 'em', 'producao', 'fora', 'do', 'padrao', 'so', 'porque', 'nao', 'sabia', 'outra', 'forma', 'de', 'resolver']	voce ja subiu codigo em producao fora do padrao so porque nao sabia outra forma de resolver	17	Por quê			CATEGORIA: Por quê		t3_1fcgafa
		t3_1fbm9qo	Fazer mestrado e trabalhar ao mesmo tempo é viável?	FALSE			reddit	fazer mestrado e trabalhar ao mesmo tempo e viavel	fazer mestrado e trabalhar ao mesmo tempo e viavel	['fazer', 'mestrado', 'e', 'trabalhar', 'ao', 'mesmo', 'tempo', 'e', 'viavel']	fazer mestrado e trabalhar ao mesmo tempo e viavel	9	Como			CATEGORIA: Como		t3_1fbm9qo
		t3_1fbkn5d	Sou estágiário. Eu deveria estudar depois do trabalho?	FALSE			reddit	sou estagiario eu deveria estudar depois do trabalho	sou estagiario eu deveria estudar depois do trabalho	['sou', 'estagiario', 'eu', 'deveria', 'estudar', 'depois', 'do', 'trabalho']	sou estagiario eu deveria estudar depois do trabalho	8	O quê			CATEGORIA: O quê		t3_1fbkn5d
		t3_1fbd1w2	Salário de 7K CLT + benefícios é uma boa proposta para desenvolvedor Java Pleno?	FALSE			reddit	salario de 7k clt + beneficios e uma boa proposta para desenvolvedor java pleno	salario de 7k clt + beneficios e uma boa proposta para desenvolvedor java pleno	['salario', 'de', '7k', 'clt', '+', 'beneficios', 'e', 'uma', 'boa', 'proposta', 'para', 'desenvolvedor', 'java', 'pleno']	salario de 7k clt + beneficios e uma boa proposta para desenvolvedor java pleno	14	Quanto			CATEGORIA: Quanto		t3_1fbd1w2
		t3_1fbjcy3	Estou atrasado?	FALSE			reddit	estou atrasado	estou atrasado	['estou', 'atrasado']	estou atrasado	2	Quando			CATEGORIA: Quando		t3_1fbjcy3
		t3_1fb6eho	da pra conseguir trabalho na área sem ter feito estágio?	FALSE			reddit	da pra conseguir trabalho na area sem ter feito estagio	da pra conseguir trabalho na area sem ter feito estagio	['da', 'pra', 'conseguir', 'trabalho', 'na', 'area', 'sem', 'ter', 'feito', 'estagio']	da pra conseguir trabalho na area sem ter feito estagio	10	Como			CATEGORIA: Como		t3_1fb6eho
		t3_1faouer	Estou sendo explorado ou é o novo normal?	FALSE			reddit	estou sendo explorado ou e o novo normal	estou sendo explorado ou e o novo normal	['estou', 'sendo', 'explorado', 'ou', 'e', 'o', 'novo', 'normal']	estou sendo explorado ou e o novo normal	8	Outro			CATEGORIA: Outro		t3_1faouer
		t3_1faifu0	Fazer segunda graduação ead (só pelo diploma) para entrar na área, vale a pena?	FALSE			reddit	fazer segunda graduacao ead so pelo diploma para entrar na area vale a pena	fazer segunda graduacao ead so pelo diploma para entrar na area vale a pena	['fazer', 'segunda', 'graduacao', 'ead', 'so', 'pelo', 'diploma', 'para', 'entrar', 'na', 'area', 'vale', 'a', 'pena']	fazer segunda graduacao ead so pelo diploma para entrar na area vale a pena	14	Por quê			CATEGORIA: Por quê		t3_1faifu0
		t3_1fafn9a	Consigo trancar a faculdade e reativar ao achar um estágio?	FALSE			reddit	consigo trancar a faculdade e reativar ao achar um estagio	consigo trancar a faculdade e reativar ao achar um estagio	['consigo', 'trancar', 'a', 'faculdade', 'e', 'reativar', 'ao', 'achar', 'um', 'estagio']	consigo trancar a faculdade e reativar ao achar um estagio	10	Como			CATEGORIA: Como		t3_1fafn9a
		t3_1faegqe	Estar fazendo uma EAD vai me prejudicar?	FALSE			reddit	estar fazendo uma ead vai me prejudicar	estar fazendo uma ead vai me prejudicar	['estar', 'fazendo', 'uma', 'ead', 'vai', 'me', 'prejudicar']	estar fazendo uma ead vai me prejudicar	7	Por quê			CATEGORIA: Por quê		t3_1faegqe
		t3_1fa61e3	Vocês ja foram responsáveis por alguem ser demitido?	FALSE			reddit	voces ja foram responsaveis por alguem ser demitido	voces ja foram responsaveis por alguem ser demitido	['voces', 'ja', 'foram', 'responsaveis', 'por', 'alguem', 'ser', 'demitido']	voces ja foram responsaveis por alguem ser demitido	8	Quem			CATEGORIA: Quem		t3_1fa61e3
		t3_1fa2anw	Mandei embora um colega de trabalho sem querer	FALSE			reddit	mandei embora um colega de trabalho sem querer	mandei embora um colega de trabalho sem querer	['mandei', 'embora', 'um', 'colega', 'de', 'trabalho', 'sem', 'querer']	mandei embora um colega de trabalho sem querer	8	O quê			CATEGORIA: O quê		t3_1fa2anw
		t3_1f9x3mo	É muita mancada desistir de uma proposta aceita com pouco tempo antes do início?	FALSE			reddit	e muita mancada desistir de uma proposta aceita com pouco tempo antes do inicio	e muita mancada desistir de uma proposta aceita com pouco tempo antes do inicio	['e', 'muita', 'mancada', 'desistir', 'de', 'uma', 'proposta', 'aceita', 'com', 'pouco', 'tempo', 'antes', 'do', 'inicio']	e muita mancada desistir de uma proposta aceita com pouco tempo antes do inicio	14	O quê			CATEGORIA: O quê		t3_1f9x3mo
		t3_1f95qnn	Entrevista utilizando HackerRank?	FALSE			reddit	entrevista utilizando hackerrank	entrevista utilizando hackerrank	['entrevista', 'utilizando', 'hackerrank']	entrevista utilizando hackerrank	3	Outro			CATEGORIA: Outro		t3_1f95qnn
		t3_1f9jegp	Conselhos para alguém querendo migrar de carreira	FALSE			reddit	conselhos para alguem querendo migrar de carreira	conselhos para alguem querendo migrar de carreira	['conselhos', 'para', 'alguem', 'querendo', 'migrar', 'de', 'carreira']	conselhos para alguem querendo migrar de carreira	7	O quê			CATEGORIA: O quê		t3_1f9jegp
		t3_1f9r3ib	Sugestões de cursos de JavaScript focado em backend?	FALSE			reddit	sugestoes de cursos de javascript focado em backend	sugestoes de cursos de javascript focado em backend	['sugestoes', 'de', 'cursos', 'de', 'javascript', 'focado', 'em', 'backend']	sugestoes de cursos de javascript focado em backend	8	O quê			CATEGORIA: O quê		t3_1f9r3ib
		t3_1f9p0wp	Pessoal ,pode fazer perguntas sobre lógica de programação aqui ? ( Ou é mais para programadores avançados)	FALSE			reddit	pessoal pode fazer perguntas sobre logica de programacao aqui ou e mais para programadores avancados	pessoal pode fazer perguntas sobre logica de programacao aqui ou e mais para programadores avancados	['pessoal', 'pode', 'fazer', 'perguntas', 'sobre', 'logica', 'de', 'programacao', 'aqui', 'ou', 'e', 'mais', 'para', 'programadores', 'avancados']	pessoal pode fazer perguntas sobre logica de programacao aqui ou e mais para programadores avancados	15	O quê			CATEGORIA: O quê		t3_1f9p0wp
		t3_1f9ppf2	Autocomplete das IDE diz alguma coisa sobre o programador?	FALSE			reddit	autocomplete das ide diz alguma coisa sobre o programador	autocomplete das ide diz alguma coisa sobre o programador	['autocomplete', 'das', 'ide', 'diz', 'alguma', 'coisa', 'sobre', 'o', 'programador']	autocomplete das ide diz alguma coisa sobre o programador	9	O quê			CATEGORIA: O quê		t3_1f9ppf2
		t3_1f9kaod	Criar projeto pessoal para usar ferramenta xyz... Faz sentido?	FALSE			reddit	criar projeto pessoal para usar ferramenta xyz faz sentido	criar projeto pessoal para usar ferramenta xyz faz sentido	['criar', 'projeto', 'pessoal', 'para', 'usar', 'ferramenta', 'xyz', 'faz', 'sentido']	criar projeto pessoal para usar ferramenta xyz faz sentido	9	O quê			CATEGORIA: O quê		t3_1f9kaod
		t3_1f9d8ct	7 Anos de .NET – Sou Pleno ou Sênior? Preciso da Opinião de Devs Mais Experientes!	FALSE			reddit	7 anos de net sou pleno ou senior preciso da opiniao de devs mais experientes	7 anos de net sou pleno ou senior preciso da opiniao de devs mais experientes	['7', 'anos', 'de', 'net', 'sou', 'pleno', 'ou', 'senior', 'preciso', 'da', 'opiniao', 'de', 'devs', 'mais', 'experientes']	7 anos de net sou pleno ou senior preciso da opiniao de devs mais experientes	15	Outro			CATEGORIA: Outro		t3_1f9d8ct
		t3_1f9dqad	Oque é programação orientada a objeto?	FALSE			reddit	oque e programacao orientada a objeto	oque e programacao orientada a objeto	['oque', 'e', 'programacao', 'orientada', 'a', 'objeto']	oque e programacao orientada a objeto	6	O quê			CATEGORIA: O quê		t3_1f9dqad
		t3_1f9bzkz	Que tipo de validação de código gerado por IA é essa?	FALSE			reddit	que tipo de validacao de codigo gerado por ia e essa	que tipo de validacao de codigo gerado por ia e essa	['que', 'tipo', 'de', 'validacao', 'de', 'codigo', 'gerado', 'por', 'ia', 'e', 'essa']	que tipo de validacao de codigo gerado por ia e essa	11	O quê			CATEGORIA: O quê		t3_1f9bzkz
		t3_1f9bodb	Ser na média ou ser o melhor da empresa?	FALSE			reddit	ser na media ou ser o melhor da empresa	ser na media ou ser o melhor da empresa	['ser', 'na', 'media', 'ou', 'ser', 'o', 'melhor', 'da', 'empresa']	ser na media ou ser o melhor da empresa	9	O quê			CATEGORIA: O quê		t3_1f9bodb
		t3_1f99aa5	mais uma graduação? ou não?	FALSE			reddit	mais uma graduacao ou nao	mais uma graduacao ou nao	['mais', 'uma', 'graduacao', 'ou', 'nao']	mais uma graduacao ou nao	5	O quê			CATEGORIA: O quê		t3_1f99aa5
		t3_1f95th7	Técnico de Informática ou Estágio?	FALSE			reddit	tecnico de informatica ou estagio	tecnico de informatica ou estagio	['tecnico', 'de', 'informatica', 'ou', 'estagio']	tecnico de informatica ou estagio	5	O quê			CATEGORIA: O quê		t3_1f95th7
		t3_1f96u5a	R$ 2,00 ou um feedback duvidoso?	FALSE			reddit	r$ 200 ou um feedback duvidoso	r$ 200 ou um feedback duvidoso	['r$', '200', 'ou', 'um', 'feedback', 'duvidoso']	r$ 200 ou um feedback duvidoso	6	O quê			CATEGORIA: O quê		t3_1f96u5a
		t3_1f906gk	empresa grande ou startup misteriosa?	FALSE			reddit	empresa grande ou startup misteriosa	empresa grande ou startup misteriosa	['empresa', 'grande', 'ou', 'startup', 'misteriosa']	empresa grande ou startup misteriosa	5	Outro			CATEGORIA: Outro		t3_1f906gk
		t3_1funt2j	Eu, 34M, estou pensando em mudar de carreira e cursar medicina aos 35. Tarde demais?	FALSE			reddit	eu 34m estou pensando em mudar de carreira e cursar medicina aos 35 tarde demais	eu 34m estou pensando em mudar de carreira e cursar medicina aos 35 tarde demais	['eu', '34', 'm', 'estou', 'pensando', 'em', 'mudar', 'de', 'carreira', 'e', 'cursar', 'medicina', 'aos', '35', 'tarde', 'demais']	eu 34 m estou pensando em mudar de carreira e cursar medicina aos 35 tarde demais	16	Outro			CATEGORIA: Outro		t3_1funt2j
		t3_1fuhbzw	Está pesando em migrar pra TI? Então eu tenho alguns conselhos para lhe ajudar a tomar uma decisão	FALSE			reddit	esta pesando em migrar pra ti entao eu tenho alguns conselhos para lhe ajudar a tomar uma decisao	esta pesando em migrar pra ti entao eu tenho alguns conselhos para lhe ajudar a tomar uma decisao	['esta', 'pesando', 'em', 'migrar', 'pra', 'ti', 'entao', 'eu', 'tenho', 'alguns', 'conselhos', 'para', 'lhe', 'ajudar', 'a', 'tomar', 'uma', 'decisao']	esta pesando em migrar pra ti entao eu tenho alguns conselhos para lhe ajudar a tomar uma decisao	18	Outro			CATEGORIA: Outro		t3_1fuhbzw
		t3_1fukvda	Terminei a faculdade mas estou perdido,poderiam me ajudar?	FALSE			reddit	terminei a faculdade mas estou perdidopoderiam me ajudar	terminei a faculdade mas estou perdidopoderiam me ajudar	['terminei', 'a', 'faculdade', 'mas', 'estou', 'perdidopoderiam', 'me', 'ajudar']	terminei a faculdade mas estou perdidopoderiam me ajudar	8	O quê			CATEGORIA: O quê		t3_1fukvda
		t3_1fupi04	Curiosidade em conseguir uma carreira dentro do futebol, é uma boa?	FALSE			reddit	curiosidade em conseguir uma carreira dentro do futebol e uma boa	curiosidade em conseguir uma carreira dentro do futebol e uma boa	['curiosidade', 'em', 'conseguir', 'uma', 'carreira', 'dentro', 'do', 'futebol', 'e', 'uma', 'boa']	curiosidade em conseguir uma carreira dentro do futebol e uma boa	11	Por quê			CATEGORIA: Por quê		t3_1fupi04
		t3_1fuowe1	Alguém já fez ou conhece alguém que fez trainee na grant Thornton?	FALSE			reddit	alguem ja fez ou conhece alguem que fez trainee na grant thornton	alguem ja fez ou conhece alguem que fez trainee na grant thornton	['alguem', 'ja', 'fez', 'ou', 'conhece', 'alguem', 'que', 'fez', 'trainee', 'na', 'grant', 'thornton']	alguem ja fez ou conhece alguem que fez trainee na grant thornton	12	Quem			CATEGORIA: Quem		t3_1fuowe1
		t3_1fuef4k	Mudança de área - Consultor de Investimentos independente?	FALSE			reddit	mudanca de area consultor de investimentos independente	mudanca de area consultor de investimentos independente	['mudanca', 'de', 'area', 'consultor', 'de', 'investimentos', 'independente']	mudanca de area consultor de investimentos independente	7	Como			CATEGORIA: Como		t3_1fuef4k
		t3_1fucjl1	Mudando para area de tecnologia, alguma dica para os estudos e sobre o mercado de trabalho??	FALSE			reddit	mudando para area de tecnologia alguma dica para os estudos e sobre o mercado de trabalho	mudando para area de tecnologia alguma dica para os estudos e sobre o mercado de trabalho	['mudando', 'para', 'area', 'de', 'tecnologia', 'alguma', 'dica', 'para', 'os', 'estudos', 'e', 'sobre', 'o', 'mercado', 'de', 'trabalho']	mudando para area de tecnologia alguma dica para os estudos e sobre o mercado de trabalho	16	Como			CATEGORIA: Como		t3_1fucjl1
		t3_1fucm07	Seguir com uma segunda graduação ou pós graduação?	FALSE			reddit	seguir com uma segunda graduacao ou pos graduacao	seguir com uma segunda graduacao ou pos graduacao	['seguir', 'com', 'uma', 'segunda', 'graduacao', 'ou', 'pos', 'graduacao']	seguir com uma segunda graduacao ou pos graduacao	8	O quê			CATEGORIA: O quê		t3_1fucm07
		t3_1fuedry	É possível combinar Economia e Programação/Data Science sem trocar de curso?	FALSE			reddit	e possivel combinar economia e programacaodata science sem trocar de curso	e possivel combinar economia e programacaodata science sem trocar de curso	['e', 'possivel', 'combinar', 'economia', 'e', 'programacaodata', 'science', 'sem', 'trocar', 'de', 'curso']	e possivel combinar economia e programacaodata science sem trocar de curso	11	Como			CATEGORIA: Como		t3_1fuedry
		t3_1fu6o3t	Arquitetura ou área da programação? (Pensando em estabilidade financeira)	FALSE			reddit	arquitetura ou area da programacao pensando em estabilidade financeira	arquitetura ou area da programacao pensando em estabilidade financeira	['arquitetura', 'ou', 'area', 'da', 'programacao', 'pensando', 'em', 'estabilidade', 'financeira']	arquitetura ou area da programacao pensando em estabilidade financeira	9	O quê			CATEGORIA: O quê		t3_1fu6o3t
		t3_1fuc8up	Dúvida: Vale a pena cursar outra faculdade? Ou é perda de tempo no meu caso?	FALSE			reddit	duvida vale a pena cursar outra faculdade ou e perda de tempo no meu caso	duvida vale a pena cursar outra faculdade ou e perda de tempo no meu caso	['duvida', 'vale', 'a', 'pena', 'cursar', 'outra', 'faculdade', 'ou', 'e', 'perda', 'de', 'tempo', 'no', 'meu', 'caso']	duvida vale a pena cursar outra faculdade ou e perda de tempo no meu caso	15	Outro			CATEGORIA: Outro		t3_1fuc8up
		t3_1ftykpx	Ajuda com escolha de curso? . . . . . . . . .....	FALSE			reddit	ajuda com escolha de curso	ajuda com escolha de curso	['ajuda', 'com', 'escolha', 'de', 'curso']	ajuda com escolha de curso	5	O quê			CATEGORIA: O quê		t3_1ftykpx
		t3_1fu13h1	Alguém pode me dar uma luz sobre que faculdade fazer?	FALSE			reddit	alguem pode me dar uma luz sobre que faculdade fazer	alguem pode me dar uma luz sobre que faculdade fazer	['alguem', 'pode', 'me', 'dar', 'uma', 'luz', 'sobre', 'que', 'faculdade', 'fazer']	alguem pode me dar uma luz sobre que faculdade fazer	10	O quê			CATEGORIA: O quê		t3_1fu13h1
		t3_1ftu724	Sou pedreiro e queria trabalhar no exterior alguma dica?	FALSE			reddit	sou pedreiro e queria trabalhar no exterior alguma dica	sou pedreiro e queria trabalhar no exterior alguma dica	['sou', 'pedreiro', 'e', 'queria', 'trabalhar', 'no', 'exterior', 'alguma', 'dica']	sou pedreiro e queria trabalhar no exterior alguma dica	9	Onde			CATEGORIA: Onde		t3_1ftu724
		t3_1ftv628	Sou muito ruim no estágio, devo desistir da área??	FALSE			reddit	sou muito ruim no estagio devo desistir da area	sou muito ruim no estagio devo desistir da area	['sou', 'muito', 'ruim', 'no', 'estagio', 'devo', 'desistir', 'da', 'area']	sou muito ruim no estagio devo desistir da area	9	O quê			CATEGORIA: O quê		t3_1ftv628
		t3_1fty1ta	Devo desistir do concurso público para ir trabalhar na empresa da família?	FALSE			reddit	devo desistir do concurso publico para ir trabalhar na empresa da familia	devo desistir do concurso publico para ir trabalhar na empresa da familia	['devo', 'desistir', 'do', 'concurso', 'publico', 'para', 'ir', 'trabalhar', 'na', 'empresa', 'da', 'familia']	devo desistir do concurso publico para ir trabalhar na empresa da familia	12	O quê			CATEGORIA: O quê		t3_1fty1ta
		t3_1ftucze	Orientação: Pedir transferência ou começar o curso do zero?	FALSE			reddit	orientacao pedir transferencia ou comecar o curso do zero	orientacao pedir transferencia ou comecar o curso do zero	['orientacao', 'pedir', 'transferencia', 'ou', 'comecar', 'o', 'curso', 'do', 'zero']	orientacao pedir transferencia ou comecar o curso do zero	9	O quê			CATEGORIA: O quê		t3_1ftucze
		t3_1fttayy	Dica de futuro na área de planejamento urbano/infraestrutura?	FALSE			reddit	dica de futuro na area de planejamento urbanoinfraestrutura	dica de futuro na area de planejamento urbanoinfraestrutura	['dica', 'de', 'futuro', 'na', 'area', 'de', 'planejamento', 'urbanoinfraestrutura']	dica de futuro na area de planejamento urbanoinfraestrutura	8	O quê			CATEGORIA: O quê		t3_1fttayy
		t3_1ftphqh	vale a pena terminar uma faculdade "só por fazer"?	FALSE			reddit	vale a pena terminar uma faculdade so por fazer	vale a pena terminar uma faculdade so por fazer	['vale', 'a', 'pena', 'terminar', 'uma', 'faculdade', 'so', 'por', 'fazer']	vale a pena terminar uma faculdade so por fazer	9	Por quê			CATEGORIA: Por quê		t3_1ftphqh
		t3_1ftelv5	Vale a pena fazer um Curso de assistente de TI no Senac em busca de entrar nesse mercado de trabalho?	FALSE			reddit	vale a pena fazer um curso de assistente de ti no senac em busca de entrar nesse mercado de trabalho	vale a pena fazer um curso de assistente de ti no senac em busca de entrar nesse mercado de trabalho	['vale', 'a', 'pena', 'fazer', 'um', 'curso', 'de', 'assistente', 'de', 'ti', 'no', 'senac', 'em', 'busca', 'de', 'entrar', 'nesse', 'mercado', 'de', 'trabalho']	vale a pena fazer um curso de assistente de ti no senac em busca de entrar nesse mercado de trabalho	20	Por quê			CATEGORIA: Por quê		t3_1ftelv5
		t3_1ftdunc	Realmente vale a pena sair da minha faculdade e pagar mais em outra ??	FALSE			reddit	realmente vale a pena sair da minha faculdade e pagar mais em outra	realmente vale a pena sair da minha faculdade e pagar mais em outra	['realmente', 'vale', 'a', 'pena', 'sair', 'da', 'minha', 'faculdade', 'e', 'pagar', 'mais', 'em', 'outra']	realmente vale a pena sair da minha faculdade e pagar mais em outra	13	Quanto			CATEGORIA: Quanto		t3_1ftdunc
		t3_1ftltse	17 anos, terminando ensino médio e perdido, alguém pode me ajudar numa "luz"?	FALSE			reddit	17 anos terminando ensino medio e perdido alguem pode me ajudar numa luz	17 anos terminando ensino medio e perdido alguem pode me ajudar numa luz	['17', 'anos', 'terminando', 'ensino', 'medio', 'e', 'perdido', 'alguem', 'pode', 'me', 'ajudar', 'numa', 'luz']	17 anos terminando ensino medio e perdido alguem pode me ajudar numa luz	13	O quê			CATEGORIA: O quê		t3_1ftltse
		t3_1ftbnbz	até que ponto é "de boa" mentir no seu currículo para conseguir um emprego melhor?	FALSE			reddit	ate que ponto e de boa mentir no seu curriculo para conseguir um emprego melhor	ate que ponto e de boa mentir no seu curriculo para conseguir um emprego melhor	['ate', 'que', 'ponto', 'e', 'de', 'boa', 'mentir', 'no', 'seu', 'curriculo', 'para', 'conseguir', 'um', 'emprego', 'melhor']	ate que ponto e de boa mentir no seu curriculo para conseguir um emprego melhor	15	O quê			CATEGORIA: O quê		t3_1ftbnbz
		t3_1ft9zqt	Devo desistir da computação e migrar para engenharia elétrica?	FALSE			reddit	devo desistir da computacao e migrar para engenharia eletrica	devo desistir da computacao e migrar para engenharia eletrica	['devo', 'desistir', 'da', 'computacao', 'e', 'migrar', 'para', 'engenharia', 'eletrica']	devo desistir da computacao e migrar para engenharia eletrica	9	O quê			CATEGORIA: O quê		t3_1ft9zqt
		t3_1ft8enn	Faculdade particular exige estágio obrigatório? Ajudem um millenial	FALSE			reddit	faculdade particular exige estagio obrigatorio ajudem um millenial	faculdade particular exige estagio obrigatorio ajudem um millenial	['faculdade', 'particular', 'exige', 'estagio', 'obrigatorio', 'ajudem', 'um', 'millenial']	faculdade particular exige estagio obrigatorio ajudem um millenial	8	O quê			CATEGORIA: O quê		t3_1ft8enn
		t3_1ft84ie	Recrutadora avisou que sou finalista, devo considerar um bom sinal?	FALSE			reddit	recrutadora avisou que sou finalista devo considerar um bom sinal	recrutadora avisou que sou finalista devo considerar um bom sinal	['recrutadora', 'avisou', 'que', 'sou', 'finalista', 'devo', 'considerar', 'um', 'bom', 'sinal']	recrutadora avisou que sou finalista devo considerar um bom sinal	10	O quê			CATEGORIA: O quê		t3_1ft84ie
		t3_1ft5cxg	Trocar design por arquitetura aos 25: estou no caminho certo?	FALSE			reddit	trocar design por arquitetura aos 25 estou no caminho certo	trocar design por arquitetura aos 25 estou no caminho certo	['trocar', 'design', 'por', 'arquitetura', 'aos', '25', 'estou', 'no', 'caminho', 'certo']	trocar design por arquitetura aos 25 estou no caminho certo	10	O quê			CATEGORIA: O quê		t3_1ft5cxg
		t3_1ft544i	Dúvida: Continuar em uni privada ou ir para federal?	FALSE			reddit	duvida continuar em uni privada ou ir para federal	duvida continuar em uni privada ou ir para federal	['duvida', 'continuar', 'em', 'uni', 'privada', 'ou', 'ir', 'para', 'federal']	duvida continuar em uni privada ou ir para federal	9	O quê			CATEGORIA: O quê		t3_1ft544i
		t3_1fsvbmj	Estou pensando em refazer minha graduação, é muita loucura?	FALSE			reddit	estou pensando em refazer minha graduacao e muita loucura	estou pensando em refazer minha graduacao e muita loucura	['estou', 'pensando', 'em', 'refazer', 'minha', 'graduacao', 'e', 'muita', 'loucura']	estou pensando em refazer minha graduacao e muita loucura	9	O quê			CATEGORIA: O quê		t3_1fsvbmj
		t3_1ft1f32	PJ pagando 90 reais a diária seria boa?????????????????????????	FALSE			reddit	pj pagando 90 reais a diaria seria boa	pj pagando 90 reais a diaria seria boa	['pj', 'pagando', '90', 'reais', 'a', 'diaria', 'seria', 'boa']	pj pagando 90 reais a diaria seria boa	8	Quanto			CATEGORIA: Quanto		t3_1ft1f32
		t3_1fszj3u	Atualmente vale a pena realizar cursos pela modalidade EAD?	FALSE			reddit	atualmente vale a pena realizar cursos pela modalidade ead	atualmente vale a pena realizar cursos pela modalidade ead	['atualmente', 'vale', 'a', 'pena', 'realizar', 'cursos', 'pela', 'modalidade', 'ead']	atualmente vale a pena realizar cursos pela modalidade ead	9	Por quê			CATEGORIA: Por quê		t3_1fszj3u
		t3_1fsxdd5	Alguém da área de TI, especialmente desenvolvimento de software para me dar um conselho/opinião?	FALSE			reddit	alguem da area de ti especialmente desenvolvimento de software para me dar um conselhoopiniao	alguem da area de ti especialmente desenvolvimento de software para me dar um conselhoopiniao	['alguem', 'da', 'area', 'de', 'ti', 'especialmente', 'desenvolvimento', 'de', 'software', 'para', 'me', 'dar', 'um', 'conselhoopiniao']	alguem da area de ti especialmente desenvolvimento de software para me dar um conselhoopiniao	14	Quem			CATEGORIA: Quem		t3_1fsxdd5
		t3_1fszdqz	Devo fazer curso técnico ou estudar para concurso?	FALSE			reddit	devo fazer curso tecnico ou estudar para concurso	devo fazer curso tecnico ou estudar para concurso	['devo', 'fazer', 'curso', 'tecnico', 'ou', 'estudar', 'para', 'concurso']	devo fazer curso tecnico ou estudar para concurso	8	O quê			CATEGORIA: O quê		t3_1fszdqz
		t3_1ft0uub	Valeu a pena recusar a oportunidade ou cometi um erro?	FALSE			reddit	valeu a pena recusar a oportunidade ou cometi um erro	valeu a pena recusar a oportunidade ou cometi um erro	['valeu', 'a', 'pena', 'recusar', 'a', 'oportunidade', 'ou', 'cometi', 'um', 'erro']	valeu a pena recusar a oportunidade ou cometi um erro	10	Outro			CATEGORIA: Outro		t3_1ft0uub
		t3_1fsqnwm	Devo desistir da área de modelação 3D e seguir veterinária?	FALSE			reddit	devo desistir da area de modelacao 3d e seguir veterinaria	devo desistir da area de modelacao 3d e seguir veterinaria	['devo', 'desistir', 'da', 'area', 'de', 'modelacao', '3d', 'e', 'seguir', 'veterinaria']	devo desistir da area de modelacao 3d e seguir veterinaria	10	O quê			CATEGORIA: O quê		t3_1fsqnwm
		t3_1fsdt7j	Quero trocar meu curso de ads por nutrição. Vale a pena?	FALSE			reddit	quero trocar meu curso de ads por nutricao vale a pena	quero trocar meu curso de ads por nutricao vale a pena	['quero', 'trocar', 'meu', 'curso', 'de', 'ads', 'por', 'nutricao', 'vale', 'a', 'pena']	quero trocar meu curso de ads por nutricao vale a pena	11	Por quê			CATEGORIA: Por quê		t3_1fsdt7j
		t3_1fsex3o	Ser designer gráfico em 2024 vale a pena? IA's e Canva são um risco?	FALSE			reddit	ser designer grafico em 2024 vale a pena ias e canva sao um risco	ser designer grafico em 2024 vale a pena ias e canva sao um risco	['ser', 'designer', 'grafico', 'em', '2024', 'vale', 'a', 'pena', 'ias', 'e', 'canva', 'sao', 'um', 'risco']	ser designer grafico em 2024 vale a pena ias e canva sao um risco	14	Por quê			CATEGORIA: Por quê		t3_1fsex3o
		t3_1fseui0	habilidades de vendas são transferíveis para outras áreas/setores de trabalho?	FALSE			reddit	habilidades de vendas sao transferiveis para outras areassetores de trabalho	habilidades de vendas sao transferiveis para outras areassetores de trabalho	['habilidades', 'de', 'vendas', 'sao', 'transferiveis', 'para', 'outras', 'areassetores', 'de', 'trabalho']	habilidades de vendas sao transferiveis para outras areassetores de trabalho	10	O quê			CATEGORIA: O quê		t3_1fseui0
		t3_1fse39u	Me ajudem: ADM e Estatística, trocar ou não trocar?	FALSE			reddit	me ajudem adm e estatistica trocar ou nao trocar	me ajudem adm e estatistica trocar ou nao trocar	['me', 'ajudem', 'adm', 'e', 'estatistica', 'trocar', 'ou', 'nao', 'trocar']	me ajudem adm e estatistica trocar ou nao trocar	9	Outro			CATEGORIA: Outro		t3_1fse39u
		t3_1fsbmwa	Ciências Econômicas na PUC-Rio ou no Mackenzie SP?	FALSE			reddit	ciencias economicas na pucrio ou no mackenzie sp	ciencias economicas na pucrio ou no mackenzie sp	['ciencias', 'economicas', 'na', 'pucrio', 'ou', 'no', 'mackenzie', 'sp']	ciencias economicas na pucrio ou no mackenzie sp	8	Onde			CATEGORIA: Onde		t3_1fsbmwa
		t3_1fs6yjt	Alguma dica/estratégia para passar no ENEM pra medicina?	FALSE			reddit	alguma dicaestrategia para passar no enem pra medicina	alguma dicaestrategia para passar no enem pra medicina	['alguma', 'dicaestrategia', 'para', 'passar', 'no', 'enem', 'pra', 'medicina']	alguma dicaestrategia para passar no enem pra medicina	8	Como			CATEGORIA: Como		t3_1fs6yjt
		t3_1fs1cd6	Devo fazer direito na USP (SanFran) ou fazer direito no Mackenzie?	FALSE			reddit	devo fazer direito na usp sanfran ou fazer direito no mackenzie	devo fazer direito na usp sanfran ou fazer direito no mackenzie	['devo', 'fazer', 'direito', 'na', 'usp', 'sanfran', 'ou', 'fazer', 'direito', 'no', 'mackenzie']	devo fazer direito na usp sanfran ou fazer direito no mackenzie	11	O quê			CATEGORIA: O quê		t3_1fs1cd6
		t3_1frdff0	Existe alguma profissão hoje que não esteja saturada?	FALSE			reddit	existe alguma profissao hoje que nao esteja saturada	existe alguma profissao hoje que nao esteja saturada	['existe', 'alguma', 'profissao', 'hoje', 'que', 'nao', 'esteja', 'saturada']	existe alguma profissao hoje que nao esteja saturada	8	O quê			CATEGORIA: O quê		t3_1frdff0
		t3_1frmc6d	Vale a pena entrar em uma universidade pública atualmente?	FALSE			reddit	vale a pena entrar em uma universidade publica atualmente	vale a pena entrar em uma universidade publica atualmente	['vale', 'a', 'pena', 'entrar', 'em', 'uma', 'universidade', 'publica', 'atualmente']	vale a pena entrar em uma universidade publica atualmente	9	Por quê			CATEGORIA: Por quê		t3_1frmc6d
		t3_1frnlkr	Faço estágio e fui chamado pra trabalhar em banco, devo aceitar?	FALSE			reddit	faco estagio e fui chamado pra trabalhar em banco devo aceitar	faco estagio e fui chamado pra trabalhar em banco devo aceitar	['faco', 'estagio', 'e', 'fui', 'chamado', 'pra', 'trabalhar', 'em', 'banco', 'devo', 'aceitar']	faco estagio e fui chamado pra trabalhar em banco devo aceitar	11	O quê			CATEGORIA: O quê		t3_1frnlkr
		t3_1frdtqk	Trabalhar em regime de plantão 24 x 72 horas. Bom ou ruim?	FALSE			reddit	trabalhar em regime de plantao 24 x 72 horas bom ou ruim	trabalhar em regime de plantao 24 x 72 horas bom ou ruim	['trabalhar', 'em', 'regime', 'de', 'plantao', '24', 'x', '72', 'horas', 'bom', 'ou', 'ruim']	trabalhar em regime de plantao 24 x 72 horas bom ou ruim	12	Outro			CATEGORIA: Outro		t3_1frdtqk
		t3_1fri3an	Graduação e carreira para alguém na faixa dos 50 anos?	FALSE			reddit	graduacao e carreira para alguem na faixa dos 50 anos	graduacao e carreira para alguem na faixa dos 50 anos	['graduacao', 'e', 'carreira', 'para', 'alguem', 'na', 'faixa', 'dos', '50', 'anos']	graduacao e carreira para alguem na faixa dos 50 anos	10	Outro			CATEGORIA: Outro		t3_1fri3an
		t3_1frsjgm	É melhor cursar em uma universidade mais próxima de casa ou na melhor avaliada? Estou em dúvida entre cursar ciências da computação na UFF ou UFRJ	FALSE			reddit	e melhor cursar em uma universidade mais proxima de casa ou na melhor avaliada estou em duvida entre cursar ciencias da computacao na uff ou ufrj	e melhor cursar em uma universidade mais proxima de casa ou na melhor avaliada estou em duvida entre cursar ciencias da computacao na uff ou ufrj	['e', 'melhor', 'cursar', 'em', 'uma', 'universidade', 'mais', 'proxima', 'de', 'casa', 'ou', 'na', 'melhor', 'avaliada', 'estou', 'em', 'duvida', 'entre', 'cursar', 'ciencias', 'da', 'computacao', 'na', 'uff', 'ou', 'ufrj']	e melhor cursar em uma universidade mais proxima de casa ou na melhor avaliada estou em duvida entre cursar ciencias da computacao na uff ou ufrj	26	Onde			CATEGORIA: Onde		t3_1frsjgm
		t3_1frdb4a	Me formando em MTM - Licenciatura e com dúvida se permaneço na área ou tento algo no Mercado Financeiro?	FALSE			reddit	me formando em mtm licenciatura e com duvida se permaneco na area ou tento algo no mercado financeiro	me formando em mtm licenciatura e com duvida se permaneco na area ou tento algo no mercado financeiro	['me', 'formando', 'em', 'mtm', 'licenciatura', 'e', 'com', 'duvida', 'se', 'permaneco', 'na', 'area', 'ou', 'tento', 'algo', 'no', 'mercado', 'financeiro']	me formando em mtm licenciatura e com duvida se permaneco na area ou tento algo no mercado financeiro	18	Outro			CATEGORIA: Outro		t3_1frdb4a
		t3_1fr3xjq	Estou quase desistindo da licenciatura... E agora?	FALSE			reddit	estou quase desistindo da licenciatura e agora	estou quase desistindo da licenciatura e agora	['estou', 'quase', 'desistindo', 'da', 'licenciatura', 'e', 'agora']	estou quase desistindo da licenciatura e agora	7	Outro			CATEGORIA: Outro		t3_1fr3xjq
		t3_1fqv3xq	Pergunta: Nessas condições, você trocaria de empresa?	FALSE			reddit	pergunta nessas condicoes voce trocaria de empresa	pergunta nessas condicoes voce trocaria de empresa	['pergunta', 'nessas', 'condicoes', 'voce', 'trocaria', 'de', 'empresa']	pergunta nessas condicoes voce trocaria de empresa	7	O quê			CATEGORIA: O quê		t3_1fqv3xq
		t3_1fqtje1	Estou há 3 anos desempregado. Se esse período se estender isso pode me prejudicar de forma "permanente"?	FALSE			reddit	estou ha 3 anos desempregado se esse periodo se estender isso pode me prejudicar de forma permanente	estou ha 3 anos desempregado se esse periodo se estender isso pode me prejudicar de forma permanente	['estou', 'ha', '3', 'anos', 'desempregado', 'se', 'esse', 'periodo', 'se', 'estender', 'isso', 'pode', 'me', 'prejudicar', 'de', 'forma', 'permanente']	estou ha 3 anos desempregado se esse periodo se estender isso pode me prejudicar de forma permanente	17	Por quê			CATEGORIA: Por quê		t3_1fqtje1
		t3_1fr19db	Dúvida sobre mudança de emprego. Meus motivos são válidos?	FALSE			reddit	duvida sobre mudanca de emprego meus motivos sao validos	duvida sobre mudanca de emprego meus motivos sao validos	['duvida', 'sobre', 'mudanca', 'de', 'emprego', 'meus', 'motivos', 'sao', 'validos']	duvida sobre mudanca de emprego meus motivos sao validos	9	Por quê			CATEGORIA: Por quê		t3_1fr19db
		t3_1fqpmhd	Processo seletivo conflitando com horário de expediente. Ser ou não transparente?	FALSE			reddit	processo seletivo conflitando com horario de expediente ser ou nao transparente	processo seletivo conflitando com horario de expediente ser ou nao transparente	['processo', 'seletivo', 'conflitando', 'com', 'horario', 'de', 'expediente', 'ser', 'ou', 'nao', 'transparente']	processo seletivo conflitando com horario de expediente ser ou nao transparente	11	O quê			CATEGORIA: O quê		t3_1fqpmhd
[truncated: 3,015 more rows]
